# Supplementary material for: Toward global integration of biodiversity big data: a harmonized metabarcode data generation module for terrestrial arthropods
Source: PubMed Central journal article supplement (PMC9295367; doi:10.1093/gigascience/giac065), 2022-07-19
Supplement: giac065_giga-d-21-00420_original_submission.pdf [file giac065_giga-d-21-00420_original_submission.pdf]

# GigaScience

## Toward global integration of biodiversity big data: a harmonised metabarcode data generation module for terrestrial arthropods

--Manuscript Draft--

|                                                      |                                                                                                                                                                                                                                                                                                                                                                                                                                                                                                                                                                                                                                                                                                                                                                                                                                                                                                                                                                                                                                                                                                                                                                                                                                                                                                                                                                                                                                                                                                                                                                                                                                                                                                                                                                                                                                                                                                                                                                                          |                      |
|------------------------------------------------------|------------------------------------------------------------------------------------------------------------------------------------------------------------------------------------------------------------------------------------------------------------------------------------------------------------------------------------------------------------------------------------------------------------------------------------------------------------------------------------------------------------------------------------------------------------------------------------------------------------------------------------------------------------------------------------------------------------------------------------------------------------------------------------------------------------------------------------------------------------------------------------------------------------------------------------------------------------------------------------------------------------------------------------------------------------------------------------------------------------------------------------------------------------------------------------------------------------------------------------------------------------------------------------------------------------------------------------------------------------------------------------------------------------------------------------------------------------------------------------------------------------------------------------------------------------------------------------------------------------------------------------------------------------------------------------------------------------------------------------------------------------------------------------------------------------------------------------------------------------------------------------------------------------------------------------------------------------------------------------------|----------------------|
| <b>Manuscript Number:</b>                            | GIGA-D-21-00420                                                                                                                                                                                                                                                                                                                                                                                                                                                                                                                                                                                                                                                                                                                                                                                                                                                                                                                                                                                                                                                                                                                                                                                                                                                                                                                                                                                                                                                                                                                                                                                                                                                                                                                                                                                                                                                                                                                                                                          |                      |
| <b>Full Title:</b>                                   | Toward global integration of biodiversity big data: a harmonised metabarcode data generation module for terrestrial arthropods                                                                                                                                                                                                                                                                                                                                                                                                                                                                                                                                                                                                                                                                                                                                                                                                                                                                                                                                                                                                                                                                                                                                                                                                                                                                                                                                                                                                                                                                                                                                                                                                                                                                                                                                                                                                                                                           |                      |
| <b>Article Type:</b>                                 | Review                                                                                                                                                                                                                                                                                                                                                                                                                                                                                                                                                                                                                                                                                                                                                                                                                                                                                                                                                                                                                                                                                                                                                                                                                                                                                                                                                                                                                                                                                                                                                                                                                                                                                                                                                                                                                                                                                                                                                                                   |                      |
| <b>Funding Information:</b>                          | Horizon 2020<br>(810729)                                                                                                                                                                                                                                                                                                                                                                                                                                                                                                                                                                                                                                                                                                                                                                                                                                                                                                                                                                                                                                                                                                                                                                                                                                                                                                                                                                                                                                                                                                                                                                                                                                                                                                                                                                                                                                                                                                                                                                 | Dr Anna Papadopoulou |
| <b>Abstract:</b>                                     | <p>Metazoan metabarcoding is emerging as an essential strategy for biodiversity inventory, with diverse projects currently generating massive quantities of community-level data. The potential for integrating across such datasets offers new opportunities to better understand biodiversity and how it might respond to global change. However, large-scale syntheses may be compromised if metabarcoding workflows differ from each other. There are ongoing efforts to improve standardisation for the reporting of inventory data. However, harmonisation at the stage of generating metabarcode data has yet to be addressed. A modular framework for harmonised data generation offers a pathway to navigate the complex structure of terrestrial metazoan biodiversity. Here, through our collective expertise as practitioners, method developers and researchers leading metabarcoding initiatives to inventory terrestrial biodiversity, we seek to initiate a harmonised framework for metabarcode data generation, with a terrestrial arthropod module. We develop an initial set of submodules covering the five main steps of metabarcode data generation: (i) sample acquisition, (ii) sample processing, (iii) DNA extraction, (iv) PCR amplification, library preparation and sequencing, and (v) DNA sequence and metadata deposition, providing a backbone for a terrestrial arthropod module. To achieve this, we (i) identified key points for harmonisation; (ii) reviewed the current state of the art; and (iii) distilled existing knowledge within submodules, thus promoting best practice by providing guidelines and recommendations to reduce the universe of methodological options. We advocate the adoption and further development of the terrestrial arthropod module. We further encourage the development of modules for other biodiversity fractions, as an essential step toward large-scale biodiversity synthesis through harmonization.</p> |                      |
| <b>Corresponding Author:</b>                         | Paula Arribas<br>Instituto de Productos Naturales y Agrobiología<br>San Cristobal de la Laguna, Canarias SPAIN                                                                                                                                                                                                                                                                                                                                                                                                                                                                                                                                                                                                                                                                                                                                                                                                                                                                                                                                                                                                                                                                                                                                                                                                                                                                                                                                                                                                                                                                                                                                                                                                                                                                                                                                                                                                                                                                           |                      |
| <b>Corresponding Author Secondary Information:</b>   |                                                                                                                                                                                                                                                                                                                                                                                                                                                                                                                                                                                                                                                                                                                                                                                                                                                                                                                                                                                                                                                                                                                                                                                                                                                                                                                                                                                                                                                                                                                                                                                                                                                                                                                                                                                                                                                                                                                                                                                          |                      |
| <b>Corresponding Author's Institution:</b>           | Instituto de Productos Naturales y Agrobiología                                                                                                                                                                                                                                                                                                                                                                                                                                                                                                                                                                                                                                                                                                                                                                                                                                                                                                                                                                                                                                                                                                                                                                                                                                                                                                                                                                                                                                                                                                                                                                                                                                                                                                                                                                                                                                                                                                                                          |                      |
| <b>Corresponding Author's Secondary Institution:</b> |                                                                                                                                                                                                                                                                                                                                                                                                                                                                                                                                                                                                                                                                                                                                                                                                                                                                                                                                                                                                                                                                                                                                                                                                                                                                                                                                                                                                                                                                                                                                                                                                                                                                                                                                                                                                                                                                                                                                                                                          |                      |
| <b>First Author:</b>                                 | Paula Arribas                                                                                                                                                                                                                                                                                                                                                                                                                                                                                                                                                                                                                                                                                                                                                                                                                                                                                                                                                                                                                                                                                                                                                                                                                                                                                                                                                                                                                                                                                                                                                                                                                                                                                                                                                                                                                                                                                                                                                                            |                      |
| <b>First Author Secondary Information:</b>           |                                                                                                                                                                                                                                                                                                                                                                                                                                                                                                                                                                                                                                                                                                                                                                                                                                                                                                                                                                                                                                                                                                                                                                                                                                                                                                                                                                                                                                                                                                                                                                                                                                                                                                                                                                                                                                                                                                                                                                                          |                      |
| <b>Order of Authors:</b>                             | Paula Arribas                                                                                                                                                                                                                                                                                                                                                                                                                                                                                                                                                                                                                                                                                                                                                                                                                                                                                                                                                                                                                                                                                                                                                                                                                                                                                                                                                                                                                                                                                                                                                                                                                                                                                                                                                                                                                                                                                                                                                                            |                      |
|                                                      | Carmelo Andújar                                                                                                                                                                                                                                                                                                                                                                                                                                                                                                                                                                                                                                                                                                                                                                                                                                                                                                                                                                                                                                                                                                                                                                                                                                                                                                                                                                                                                                                                                                                                                                                                                                                                                                                                                                                                                                                                                                                                                                          |                      |
|                                                      | Kristine Bohmann                                                                                                                                                                                                                                                                                                                                                                                                                                                                                                                                                                                                                                                                                                                                                                                                                                                                                                                                                                                                                                                                                                                                                                                                                                                                                                                                                                                                                                                                                                                                                                                                                                                                                                                                                                                                                                                                                                                                                                         |                      |
|                                                      | Jeremy R deWaard                                                                                                                                                                                                                                                                                                                                                                                                                                                                                                                                                                                                                                                                                                                                                                                                                                                                                                                                                                                                                                                                                                                                                                                                                                                                                                                                                                                                                                                                                                                                                                                                                                                                                                                                                                                                                                                                                                                                                                         |                      |
|                                                      | Evan P Economo                                                                                                                                                                                                                                                                                                                                                                                                                                                                                                                                                                                                                                                                                                                                                                                                                                                                                                                                                                                                                                                                                                                                                                                                                                                                                                                                                                                                                                                                                                                                                                                                                                                                                                                                                                                                                                                                                                                                                                           |                      |
|                                                      | Vasco Elbrecht                                                                                                                                                                                                                                                                                                                                                                                                                                                                                                                                                                                                                                                                                                                                                                                                                                                                                                                                                                                                                                                                                                                                                                                                                                                                                                                                                                                                                                                                                                                                                                                                                                                                                                                                                                                                                                                                                                                                                                           |                      |
|                                                      | Stefan Geisen                                                                                                                                                                                                                                                                                                                                                                                                                                                                                                                                                                                                                                                                                                                                                                                                                                                                                                                                                                                                                                                                                                                                                                                                                                                                                                                                                                                                                                                                                                                                                                                                                                                                                                                                                                                                                                                                                                                                                                            |                      |
|                                                      |                                                                                                                                                                                                                                                                                                                                                                                                                                                                                                                                                                                                                                                                                                                                                                                                                                                                                                                                                                                                                                                                                                                                                                                                                                                                                                                                                                                                                                                                                                                                                                                                                                                                                                                                                                                                                                                                                                                                                                                          |                      |

|                                                                                                                                                                                                                                                                                                                                                                                                                                    |                           |
|------------------------------------------------------------------------------------------------------------------------------------------------------------------------------------------------------------------------------------------------------------------------------------------------------------------------------------------------------------------------------------------------------------------------------------|---------------------------|
|                                                                                                                                                                                                                                                                                                                                                                                                                                    | Marta Goberna             |
|                                                                                                                                                                                                                                                                                                                                                                                                                                    | Henrik Krehenwinkel       |
|                                                                                                                                                                                                                                                                                                                                                                                                                                    | Vojtech Novotny           |
|                                                                                                                                                                                                                                                                                                                                                                                                                                    | Lucie Zinger              |
|                                                                                                                                                                                                                                                                                                                                                                                                                                    | Thomas J Creedy           |
|                                                                                                                                                                                                                                                                                                                                                                                                                                    | Emmanouil Meramveliotakis |
|                                                                                                                                                                                                                                                                                                                                                                                                                                    | Víctor Noguerales         |
|                                                                                                                                                                                                                                                                                                                                                                                                                                    | Isaac Overcast            |
|                                                                                                                                                                                                                                                                                                                                                                                                                                    | Hélène Morlon             |
|                                                                                                                                                                                                                                                                                                                                                                                                                                    | Anna Papadopoulou         |
|                                                                                                                                                                                                                                                                                                                                                                                                                                    | Alfried P Vogler          |
|                                                                                                                                                                                                                                                                                                                                                                                                                                    | Brent C Emerson           |
| <b>Order of Authors Secondary Information:</b>                                                                                                                                                                                                                                                                                                                                                                                     |                           |
| <b>Additional Information:</b>                                                                                                                                                                                                                                                                                                                                                                                                     |                           |
| <b>Question</b>                                                                                                                                                                                                                                                                                                                                                                                                                    | <b>Response</b>           |
| Are you submitting this manuscript to a special series or article collection?                                                                                                                                                                                                                                                                                                                                                      | No                        |
| <p><b>Experimental design and statistics</b></p> <p>Full details of the experimental design and statistical methods used should be given in the Methods section, as detailed in our <a href="#">Minimum Standards Reporting Checklist</a>. Information essential to interpreting the data presented should be made available in the figure legends.</p> <p>Have you included all the information requested in your manuscript?</p> | Yes                       |
| <p><b>Resources</b></p> <p>A description of all resources used, including antibodies, cell lines, animals and software tools, with enough information to allow them to be uniquely identified, should be included in the Methods section. Authors are strongly encouraged to cite <a href="#">Research Resource Identifiers</a> (RRIDs) for antibodies, model organisms and tools, where possible.</p>                             | Yes                       |

|                                                                                                                                                                                                                                                                                                                                                                                                                                                                                                                                                         |            |
|---------------------------------------------------------------------------------------------------------------------------------------------------------------------------------------------------------------------------------------------------------------------------------------------------------------------------------------------------------------------------------------------------------------------------------------------------------------------------------------------------------------------------------------------------------|------------|
| <p>Have you included the information requested as detailed in our <a href="#">Minimum Standards Reporting Checklist</a>?</p>                                                                                                                                                                                                                                                                                                                                                                                                                            |            |
| <p><b>Availability of data and materials</b></p> <p>All datasets and code on which the conclusions of the paper rely must be either included in your submission or deposited in <a href="#">publicly available repositories</a> (where available and ethically appropriate), referencing such data using a unique identifier in the references and in the “Availability of Data and Materials” section of your manuscript.</p> <p>Have you have met the above requirement as detailed in our <a href="#">Minimum Standards Reporting Checklist</a>?</p> | <p>Yes</p> |

1           **Toward global integration of biodiversity big data: a harmonised**  
2           **metabarcoding data generation module for terrestrial arthropods**

3  
4           Paula Arribas<sup>1\*</sup>, Carmelo Andújar<sup>1</sup>, Kristine Bohmann<sup>2</sup>, Jeremy R. deWaard<sup>3,4</sup>, Evan P.  
5           Economato<sup>5</sup>, Vasco Elbrecht<sup>6</sup>, Stefan Geisen<sup>7</sup>, Marta Goberna<sup>8</sup>, Henrik Krehenwinkel<sup>9</sup>, Vojtech  
6           Novotny<sup>10,11</sup>, Lucie Zinger<sup>12,13</sup>, Thomas J. Creedy<sup>14</sup>, Emmanouil Meramveliotakis<sup>15</sup>, Víctor  
7           Noguerales<sup>1</sup>, Isaac Overcast<sup>12</sup>, Hélène Morlon<sup>12</sup>, Anna Papadopoulou<sup>15</sup>, Alfried P. Vogler<sup>14,16</sup>,  
8           Brent C. Emerson<sup>1</sup>

9           <sup>1</sup> Island Ecology and Evolution Research Group, Institute of Natural Products and Agrobiology (IPNA-  
10           CSIC), San Cristóbal de la Laguna, Spain.

11           <sup>2</sup> Section for Evolutionary Genomics, Globe Institute, Faculty of Health and Medical Sciences, University  
12           of Copenhagen, Denmark.

13           <sup>3</sup> Centre for Biodiversity Genomics, University of Guelph, Guelph, Canada.

14           <sup>4</sup> School of Environmental Sciences, University of Guelph, Guelph, Canada.

15           <sup>5</sup> Biodiversity and Biocomplexity Unit, Okinawa Institute of Science and Technology Graduate University,  
16           Japan.

17           <sup>6</sup> Centre for Biodiversity Monitoring (ZBM), Zoological Research Museum Alexander Koenig,  
18           Adenauerallee 160, D-53113 Bonn, Germany.

19           <sup>7</sup> Laboratory of Nematology, Department of Plant Sciences, Wageningen University and Research, 6708PB  
20           Wageningen, The Netherlands.

21           <sup>8</sup> Department of Environment and Agronomy, INIA-CSIC, Madrid, Spain.

22           <sup>9</sup> Department of Biogeography, Trier University, Trier, Germany.

23           <sup>10</sup> Biology Centre, Czech Academy of Sciences, Institute of Entomology, 37005 Ceske Budejovice, Czech  
24           Republic.

25           <sup>11</sup> Faculty of Science, University of South Bohemia, 37005 Ceske Budejovice, Czech Republic.

26           <sup>12</sup> Institut de Biologie de l'ENS (IBENS), Département de biologie, École normale supérieure, CNRS,  
27           INSERM, Université PSL, 75005 Paris, France.

28           <sup>13</sup> Naturalis Biodiversity Center, Leiden, The Netherlands

29           <sup>14</sup> Department of Life Sciences, Natural History Museum, London, UK.

30           <sup>15</sup> Department of Biological Sciences, University of Cyprus, Nicosia, Cyprus.

31           <sup>16</sup> Department of Life Sciences, Imperial College London, London, UK.

32           \*Corresponding author: [pauarribas@ipna.csic.es](mailto:pauarribas@ipna.csic.es). <https://orcid.org/0000-0002-0358-8271>

## 33 **Abstract**

34 Metazoan metabarcoding is emerging as an essential strategy for biodiversity inventory, with  
35 diverse projects currently generating massive quantities of community-level data. The potential  
36 for integrating across such datasets offers new opportunities to better understand biodiversity and  
37 how it might respond to global change. However, large-scale syntheses may be compromised if  
38 metabarcoding workflows differ from each other. There are ongoing efforts to improve  
39 standardisation for the reporting of inventory data. However, harmonisation at the stage of  
40 generating metabarcode data has yet to be addressed. A modular framework for harmonised data  
41 generation offers a pathway to navigate the complex structure of terrestrial metazoan biodiversity.  
42 Here, through our collective expertise as practitioners, method developers and researchers leading  
43 metabarcoding initiatives to inventory terrestrial biodiversity, we seek to initiate a harmonised  
44 framework for metabarcode data generation, with a terrestrial arthropod module. We develop an  
45 initial set of submodules covering the five main steps of metabarcode data generation: (i) sample  
46 acquisition, (ii) sample processing, (iii) DNA extraction, (iv) PCR amplification, library  
47 preparation and sequencing, and (v) DNA sequence and metadata deposition, providing a  
48 backbone for a terrestrial arthropod module. To achieve this, we (i) identified key points for  
49 harmonisation; (ii) reviewed the current state of the art; and (iii) distilled existing knowledge  
50 within submodules, thus promoting best practice by providing guidelines and recommendations to  
51 reduce the universe of methodological options. We advocate the adoption and further development  
52 of the terrestrial arthropod module. We further encourage the development of modules for other  
53 biodiversity fractions, as an essential step toward large-scale biodiversity synthesis through  
54 harmonization.

55

## 56 **Keywords**

57 Metabarcoding, arthropods, harmonisation, data generation, modular structure, biodiversity  
58 inventory, biodiversity big data integration, reproducibility, comparability.

59

## 60 **Main text**

## 61 **Background**

62 DNA metabarcoding, involving PCR-coupled high-throughput sequencing (HTS) directly from

63 bulk or environmental samples, represents the most cost-efficient approach for obtaining  
64 molecular community profiles [1,2]. Metabarcoding is increasingly being used to characterise and  
65 monitor biodiversity, and is recognised as a substantial advance leading to a step change in  
66 multiple fields of biodiversity science (e.g. [3–5]). Diverse projects, from local to global scales,  
67 are currently generating massive quantities of site-based community-level biodiversity inventory  
68 data, including hyperdiverse assemblages or groups for which classical sampling and identification  
69 is overly complicated and time-consuming. The potential for integrating across such data, from  
70 diverse sources and time series, offers new opportunities to better understand how biodiversity is  
71 structured in space and time, and the factors that regulate it. Additionally, such integration can be  
72 leveraged for better monitoring and the development of holistic biodiversity conservation  
73 strategies, in response to global change [4,6,7]. However, collective international efforts are  
74 required to achieve optimal global integration and synthesis. While integrative efforts for  
75 harmonised site-based genomic inventories exist in the microbial realm (e.g. [8–10]), such a  
76 framework has yet to be extended to non-microbial fractions of biodiversity. However, there is an  
77 emerging consensus that such integration can be achieved within a HTS framework, analogous to  
78 the Genomic Observatories (GO) concept, first proposed by Davies et al., [11,12]. If effective  
79 strategies can be developed to harmonise metabarcode inventory data, these can potentially scale  
80 up to a non-centralised network within which global patterns and trends of biodiversity can be  
81 addressed [13].

82         There are ongoing efforts to maximise the potential for integrating across independent  
83 biodiversity data sets through improved standardisation for the reporting of inventory data  
84 (Humboldt Core: [14]). In the case of molecular data specifically, the GEOME initiative [15,16]  
85 promotes standardisation for the reporting of taxonomic, genomic and metadata through  
86 customisable yet standard-compliant spreadsheets that capture the temporal and geospatial context  
87 of a biosample. However, harmonisation at the stage of generating metabarcode biodiversity data

88 has yet to be addressed, and thus remains a fundamental impediment for data integration. The  
89 success of global microbial initiatives (even if data generation has been centralised) has pivoted  
90 on standardised metabarcoding protocols for sampling, DNA extraction, barcode  
91 amplification/enrichment and library generation and sequencing of microbial/planktonic  
92 communities (e.g. [17,18] for the Earth Microbiome Project, EMP or [19–21] for the TARA  
93 Oceans and the Ocean Sampling Day, OSD). Despite pioneering efforts to harmonise metabarcode  
94 data generation beyond microbial biodiversity fractions (e.g. see [22,23] for eDNA initiatives)  
95 further efforts are required within this expanding research area.

## 96 **A harmonised framework for the generation of metabarcode data for** 97 **terrestrial animals**

98 Terrestrial metazoans constitute one of the most heterogeneous group in body size across the tree  
99 of life. Metabarcoding is emerging as an important approach for the inventory of metazoan  
100 diversity, and is increasingly being used across the fields of community ecology, evolutionary  
101 ecology, biogeography, conservation biology, and environmental management, among others.  
102 Given the rapid development of data generation in this area, the potential for downstream synthesis  
103 across independently generated data sets may be compromised if divergent strategies are being  
104 implemented. There is already concern that nuances in metabarcoding workflows make  
105 comparison difficult (e.g. [24–27]). Guidance for the implementation of effective and robust  
106 sampling and sample-processing approaches is both timely and essential, and will increase the  
107 potential for broader benefits to biodiversity science through harmonisation. We believe that the  
108 overarching goal of a harmonised metabarcode framework for inventorying biodiversity should be  
109 to reduce unnecessary heterogeneity in the generation of metabarcode data, thus facilitating  
110 calibration and so comparability and integration among independent metabarcode data sets. The  
111 key challenge is to catalyse the bottom-up growth of a GO network for global integration and  
112 synthesis within biodiversity science, while also allowing flexibility to successfully address

113 objectives at the individual project level.

114 It has previously been argued that a harmonised framework with a “modular” structure for  
115 data generation could offer a pathway to navigate through the complex structure of terrestrial  
116 metazoan biodiversity, by placing different fractions of terrestrial diversity at the core of each  
117 “module” [13]. Within such a framework, best practices and harmonised protocols for the  
118 generation of metabarcode data can be developed for different target fractions of biodiversity (e.g.  
119 terrestrial arthropods). Within individual modules, submodules serve as the fundamental building  
120 blocks that provide guidelines and recommendations for the five key steps to generate metabarcode  
121 data: (i) sample acquisition, (ii) sample processing, (iii) DNA extraction, (iv) PCR amplification,  
122 library preparation and sequencing, and (v) DNA sequence and metadata deposition. Different  
123 data generation pipelines can be configured within a module by choosing among submodule  
124 options, allowing for variable requirements of different assemblages within the module (e.g.  
125 flying, aquatic or ground arthropods within a terrestrial arthropod module), and different sample  
126 vouchering needs (e.g. destructive vs non-destructive DNA extraction). Such a modular structure  
127 provides a harmonised framework for comparability across independent studies, by reducing  
128 redundant efforts, and improving reporting and comparability, while retaining flexibility to  
129 incorporate additional submodules as the need arises (Figure 1).

130 Here, through our collective expertise as practitioners of metabarcoding, method  
131 developers and researchers leading metabarcoding initiatives to inventory terrestrial arthropod  
132 biodiversity, we seek to initiate a harmonised framework for the generation of terrestrial metazoan  
133 metabarcode data. Specifically, we aim to provide an initial set of submodules covering the five  
134 main steps of metabarcode data generation that constitute the backbone of a terrestrial arthropod  
135 module. We first: (i) identify key points for harmonisation within each step; (ii) review the current  
136 state of the art within the arthropod metabarcoding literature; and then (iii) distil existing  
137 information and knowledge within submodules, thus promoting best practice by providing



138 guidelines and recommendations to reduce the universe of methodological options.  
139 Standardisation or harmonisation of methods will, in some contexts, lead to trade-offs against what  
140 might be considered perfect methods [28]. Within any field, the long-view of achieving unifying  
141 principles from synthetic analyses will be increasingly constrained as a function of any collateral  
142 costs incurred by individual projects as a result of adopting a harmonised protocol. Thus, rather  
143 than being overly prescriptive, we seek to propose a flexible framework that can be opted into with  
144 minimal, if any compromise, to increase the comparative value of metabarcode data.

### 145 **Harmonisation for the metabarcoding of terrestrial arthropods**

146 Arthropods comprise the overwhelming majority of known animal species in terrestrial habitats,  
147 and present tremendous trait variation, which presents a substantial challenge for assessing their  
148 responses to environmental change. It has been estimated that there are 5.5 million insect species  
149 on Earth, most yet to be discovered, and up to 6.8 million species (range 5.9–7.8 million) for all  
150 terrestrial arthropods [29]. The declines of insects and other arthropods is a now very real and  
151 serious threat that society must urgently address [30,31]. Additionally, arthropods include many  
152 invasive species [32], requiring comparable baseline data to study the potential susceptibility and  
153 responses of communities to invasion. DNA metabarcoding has emerged as a powerful approach  
154 for characterising complex, and in many cases largely unknown, arthropod assemblages [7,33]. In  
155 response to this, researchers from diverse disciplines are shifting from conventional arthropod  
156 inventory approaches to DNA metabarcoding, with evidence for exponential growth in uptake  
157 [34]. Indeed, adaptations of microbial metabarcoding approaches to the macroscopic component  
158 of diversity have been heavily influenced by their application to the arthropod fauna (see [1,35]  
159 for pioneering studies). Metabarcoding of DNA extracted from bulk samples of whole organisms  
160 (whole organism community DNA, wocDNA) is: (i) the most common and straightforward  
161 metabarcoding approach to inventory arthropod biodiversity; (ii) comparable to standard methods  
162 of in arthropod monitoring, and; (iii) has high potential for harmonisation [26].

163 Data generation practices for the metabarcoding of arthropod community samples are still  
164 in the early stages. Through the development and adoption of a standardized terrestrial arthropod  
165 data generation module, the potential for comparability across future large-scale biodiversity  
166 inventorying efforts can be optimised. There is sufficient background from which  
167 recommendations can be developed (e.g. [36–40]), to guide methodological decisions within the  
168 emerging research community. Recent global initiatives that pivot on arthropod wocDNA also  
169 provide a critical mass for developing harmonised data generation, while simultaneously  
170 highlighting the relevance and timeliness of a terrestrial arthropod module. These initiatives  
171 include the BIOSCAN initiative (<https://ibol.org/programs/bioscan/>) and its regional extensions  
172 such as BIOSCAN Europe (<https://www.bioscaneurope.org/>), BioAlfa, the Kruger Malaise  
173 Program [41], the SITE-100 project (<https://www.site100.org/>), the Insect Biome Atlas Project  
174 (<https://insectbiomeatlas.org>), LIFEPLAN (<https://www.helsinki.fi/en/projects/lifeplan>), and the  
175 OKEON initiative (<https://okeon.unit.oist.jp/>).

176 ***Identifying key points of harmonisation to build on the submodules within each***  
177 ***data generation step***

178 **1. Sample acquisition**

179 A departure point for integration across independent biodiversity inventory efforts is a harmonised  
180 sample definition. In the case of terrestrial arthropods, sample definition is strongly linked to the  
181 sampling technique implemented. There is extensive evidence that different arthropod mass  
182 sampling techniques have differing capture efficiencies with regard to total community  
183 assemblages within which they are deployed, with no one method serving as a panacea for  
184 inventorying the arthropod diversity within a site [42]. In this context, with the aim of  
185 standardizing insect inventorying and monitoring methods, Montgomery et al., [43] proposed  
186 seven main sampling methods with the aim of maximising data integration across insect  
187 monitoring efforts, including: (i) Malaise trapping, (ii) light trapping, (iii) pan trapping, (iv) pitfall

188 trapping, (v) beating sheets, (vi) acoustic monitoring, and (vii) active visual surveys. These  
189 complementary sampling methods provide an appropriate platform from which to develop sample  
190 acquisition submodules, which could be implemented individually or combined for more complex  
191 sampling designs.

192         Most implementations of wocDNA metabarcoding to date are Malaise-trap based, at scales  
193 ranging from local to global (e.g. [44–49]). Additionally, Malaise traps are frequently deployed  
194 together with other sampling techniques to generate plot-based arthropod inventory data (e.g. [50],  
195 SITE100, ForestGEO arthropod protocol), and are the sampling strategy of the Global Malaise  
196 Trap Program/BIOSCAN initiative [44], with more than 10K samples already generated  
197 worldwide. Malaise traps [51] are primarily effective for sampling flying insects (e.g. [52]) but  
198 have gained popularity for assessing terrestrial arthropod communities (e.g. [53]), and have been  
199 proposed as ideal for insect biomonitoring using metabarcoding [43,50]. Once installed, they  
200 require limited effort and can yield clean samples comprising almost exclusively arthropods, and  
201 in very large numbers (up to 10,000 specimens per week in some cases). Moreover, they can  
202 remain in place and yield new samples through passive sampling with low handling time, making  
203 them suitable for time-resolved monitoring. Given these considerations, Malaise traps are an  
204 obvious sampling submodule candidate.

205         Following the recommendations of Montgomery et al., [43], together with operational  
206 procedures adopted within the BIOSCAN initiative  
207 (<https://biodiversitygenomics.net/resources/bioscan>), Townes-style Malaise traps are preferred,  
208 with a 165 × 110 cm interception area being most common and 95% ethanol as the preservation  
209 agent (see [50]) but propylene glycol (ratio of 50-100% propylene glycol, with water is frequently  
210 recommended as evaporation is negligible compared to ethanol and adequately preserves DNA  
211 [54,55]). Sampling effort has typically been delimited to one week within most metabarcoding  
212 studies, representing a compromise between maximising sampling effort and reducing potential

213 problems with DNA degradation [38]. The Malaise trap should preferably be placed at the centre  
214 of the habitat patch to be characterised and, when possible, the trap should be positioned at a right  
215 angle to the dominant insect flight line. While submodule implementation can be restricted to a  
216 single trap, we emphasize that biological replicates (simultaneous Malaise trapping events) are  
217 desirable within the same habitat patch [56], and can provide useful information regarding  
218 sampling efficiency (see e.g [57,58] for occupancy modelling using some means of sampling  
219 replication for insects). Similarly, temporal replication is also desirable, considering the possible  
220 variability due to changing environmental conditions optimal for arthropod activity, and species-  
221 specific idiosyncracies. If temporal replication is not possible, trapping during maximum activity  
222 periods of flying insects is desirable. See Table 1 for a summary of key guidelines and  
223 recommendations for the 1.1 Malaise trapping sample acquisition submodule.

224         Recording metadata associated with sampling is also an important action for  
225 harmonisation. Our opinion converges on a minimum set of metadata attributes for each sample:  
226 (i) the geographical coordinates of the Malaise trap, (ii) the date and time interval for the sampling  
227 event, and (iii) photo recording (ideally a 360° photo around each trap) of the habitat patch within  
228 which the Malaise trap is placed. In agreement with Montgomery et al. [43], we also recommend  
229 metadata reporting for the presence of rainfall, or extreme weather events during the trapping.  
230 Detailed characterisation of habitat and microhabitats within sampling sites would require time  
231 and resources that may limit module uptake. If needed, environmental characterisation of sampling  
232 sites can potentially be extracted from remote sensing data (see [4]). For additional information  
233 on metadata reporting, see section 5, DNA sequence and metadata sharing and storage.

234         Sample storage conditions, as the endpoint of the sample acquisition chain, carry  
235 implications for downstream data quality, and are thus an important focus for harmonisation.  
236 Sample storage conditions are consequential for the degradation of target DNA and/or the  
237 proliferation of non-target biomass in the sample. As such, they can strongly impact

238 metabarcoding biodiversity profiles [59]. However, the effect of this bias on mock arthropod  
 239 samples, at least for short-term storage (i.e. < 1 month), is of limited importance (see [38]). In the  
 240 case of longer storage of arthropod community samples, we strongly recommend the use of >95%  
 241 molecular grade ethanol as a preservative using leak-proof glass or plastic vials or jars [60],  
 242 ensuring that the entire bulk sample is fully submerged before storage and then storage conditions  
 243 of -20 or -80°C. In the case of storage or transport safety constraints, propylene glycol (undiluted)  
 244 can be used as an alternative to ethanol [61]. Such an approach will limit inherent biases in  
 245 inventory data due to irregular DNA degradation. The storage of biological replicates is always  
 246 desirable (Table 1).

247 **Table 1.** Summary of key guidelines and recommendations within the *1.1 Malaise trapping*  
 248 *sample acquisition submodule*.

| <b>1.1 Malaise trapping sample acquisition submodule</b> |                                                                                                                                                                                                                                                                  |
|----------------------------------------------------------|------------------------------------------------------------------------------------------------------------------------------------------------------------------------------------------------------------------------------------------------------------------|
| Sample definition                                        | Townes-style Malaise trap (165 × 110 cm interception area)<br>One week per sample<br>Collecting fluid: >95% ethanol/propylene glycol<br>Centre in habitat patch location<br>Position perpendicular to natural flight corridor<br>Spatial and temporal replicates |
| Sampling event metadata                                  | Geographical coordinates<br>Date and period of trapping<br>Photo recording for habitat and microhabitat<br>Extreme weather events during trapping                                                                                                                |
| Sample storage                                           | >95% molecular grade ethanol/propylene glycol<br>Fully submerged biomass<br>Storage conditions of -20° or -80°C                                                                                                                                                  |

249

250 While Malaise trapping is notably efficient for aerially active arthropods, species with low  
 251 mobility are less likely to be sampled (e.g. [62]). In this context, pitfall trapping offers a  
 252 complementary passive sampling technique, and thus we consider it to be an appropriate candidate  
 253 for the development of a complementary sampling submodule. Pitfall traps [63] are containers

254 buried in the ground with their rim at surface level to capture ground-dwelling (epigeic) insects.  
255 Pitfall traps are the most effective method for sampling ground active arthropods, and are an  
256 established and popular monitoring technique (e.g. the US National Ecological Observatory  
257 Network [NEON], [54]; the UK Environmental Change Network, [64]). Pitfall and Malaise traps  
258 are highly complementary, sampling largely non-overlapping fractions of arthropod assemblages  
259 with reduced additional effort, and they have already been jointly applied in several wocDNA  
260 metabarcoding studies (e.g. [48]).

261           Guidelines for standardising pitfall trapping, based on a review of the existing literature  
262 [65], have recommended plastic cups with 11 cm diameter and 9-11 cm depth, and a roof raised  
263 1.5 cm above the trap entrance. The number of individuals sampled per trap can be limited, and as  
264 such, composite samples from multiple pitfall traps can be used to increase the sampling effort.  
265 There is some controversy over how far apart traps should be placed to be considered as  
266 independent samples (e.g. [66,67]). We suggest that the NEON protocol [54] provides a suitable  
267 framework for harmonisation, within which a composite sample is generated using four pitfall  
268 traps arranged at the corners of a square with sides of 25 m . While submodule implementation  
269 can be restricted to a single composite sample (four pitfall traps), biological replicates are desirable  
270 (e.g. [54]), and can be achieved by allowing several metres between replicate traps within each  
271 corner. Sampling effort is defined by the trapping interval and varies across studies, typically  
272 ranging from three days to four weeks (e.g. [48,54,68]). One week provides an appropriate interval  
273 for harmonisation, and facilitates coordination with the setting and servicing of Malaise traps.  
274 Temporal replication is also desirable and if not possible, trapping should be targeted toward  
275 periods of maximum arthropod activity [54]. Propylene glycol (ratio of 50-100% propylene glycol,  
276 with water; for a total volume between 100 and 200 mL, depending upon the dilution ratio) is the  
277 most frequently recommended collecting medium, as evaporation is negligible compared to  
278 ethanol, it is odourless, and it adequately preserves DNA ([54,55], Table 2).

279 Similar to Malaise traps, a minimum set of metadata attributes for each pitfall composite  
 280 sample should include: (i) the geographical coordinates of the trap, (ii) period of the trapping event  
 281 and (iii) photo recording (ideally a 360° photo around each trap). Following Montgomery et al.  
 282 [43], we also recommend metadata reporting for the presence of rainfall or extreme events during  
 283 sampling. Finally, in order to minimise the degradation of target DNA and/or the proliferation of  
 284 non-target biomass in the sample during medium-long term storage, we strongly recommend the  
 285 use of >95% molecular grade ethanol, or propylene glycol, as described above for Malaise trap  
 286 samples). See Table 2 for key guidelines and recommendations of the 1.2 Pitfall trapping sample  
 287 acquisition submodule.

288 **Table 2.** Summary of key guidelines and recommendations within the *1.2 Pitfall trapping sample*  
 289 *acquisition submodule*.

| <b>1.2 Pitfall trapping sample acquisition submodule</b> |                                                                                                                                                                                                                                                                             |
|----------------------------------------------------------|-----------------------------------------------------------------------------------------------------------------------------------------------------------------------------------------------------------------------------------------------------------------------------|
| Sample definition                                        | Plastic cups with diameter: 11 cm, depth: 9-11 cm, and a roof raised 1.5 cm<br>Composite sample (four pitfall traps, placed at the corners of a square with sides of 25 m).<br>One week per sample<br>Collecting fluid: propylene glycol<br>Spatial and temporal replicates |
| Sampling event metadata                                  | Geographical coordinates<br>Date and period of trapping<br>Photo recording for habitat and microhabitat                                                                                                                                                                     |
| Sample storage                                           | >95% mol grade ethanol/propylene glycol<br>Fully submerged biomass<br>Storage conditions of -20° or -80°C                                                                                                                                                                   |

290

## 291 **2. Sample processing**

292 In contrast to microbial or environmental DNA (eDNA) approaches, where samples can be directly  
 293 processed for DNA extraction, the macroscopic nature of arthropod community samples has led  
 294 to a broad range of sample processing protocols, among which size sorting is the most common.

295 Size sorting is often used because larger specimens tend to release more DNA and may dominate  
296 the total sequence count in metabarcoding data [69]. Thus, sorting invertebrates into multiple size  
297 classes and then pooling the digested tissue according to DNA concentration, abundance or  
298 richness in each class has become common practice (e.g. [1,70,71]), and size sorting has revealed  
299 improved efficiency in the detection of low biomass species (e.g. [40,70]). However, increasing  
300 sequencing depth by 3-4 fold can also increase taxon recovery to comparable levels without size  
301 sorting [72]. More generally, it has been suggested that with sufficient sequencing depth and within  
302 reasonable size ranges, species recovery is not skewed by variable biomass of species, and that a  
303 size sorting step need not be carried out [71]. In addition to the fact that handling time for size  
304 sorting places high logistical constraints for large-scale studies, size sorting procedures also reduce  
305 comparability across independent initiatives if not fully harmonised. Given these considerations,  
306 we consider size sorting to be unnecessary for a harmonised approach, but if incorporated it should  
307 be of limited complexity (e.g. wet sieving into two size fractions, 4mm sieve pooled 1:10 to 2:10,  
308 [72]) and properly reported. Removing any form of biomass sorting/sample picking steps will also  
309 improve cost-effectiveness and facilitate broad implementation for biomonitoring [26].

310 Biomass and abundance information is often fundamental for biodiversity analysis,  
311 including the global assessment of arthropod decline (see [73]). However, deriving abundance  
312 information from metabarcode data remains a challenge, primarily due to inherent biases during  
313 PCR amplification, but also because of variation in gene copy number, organelle number, and  
314 technical aspects of workflows for sampling, laboratory procedures, sequencing and bioinformatic  
315 processing [5,69,74]. Given these considerations, we consider that an arthropod community  
316 sample processing submodule should emphasise the importance of (i) providing a wet weight  
317 measurement for each sample and (ii) generating arthropod community sample photographs. Wet  
318 mass measurement can be used as a surrogate for sample biomass. It can be easily obtained from samples  
319 after filtering off excess ethanol using a nylon filtration fabric that retains smaller specimens (e.g. 20 µm  
320 filters).



321           Photographic recording is not a commonly reported practice, but looking forward we think  
322 it is very likely that the integration of quantitative morphological and molecular approaches will  
323 be an important area of interest and development [75]. There is potential for image-based specimen  
324 identification involving machine learning tools to be applied as an external validation of  
325 molecular-based diversity estimations, particularly for arthropod groups with limited cryptic  
326 variation between species [75–77]. While obtaining high-quality images of arthropod community  
327 samples may be time-consuming, we recommend, as a minimum, that such images should be taken  
328 at high-resolution using a conventional stereoscope equipped with a built-in microscope camera  
329 or an external single lens reflex (SLR) camera with macro lens, over a white background (ideally  
330 submerged under ethanol in a plastic tray), and minimising the overlap among individuals to  
331 provide a physical record of the sample. Vouchering selected specimens may be considered  
332 unnecessary when well-parameterized reference libraries are available (e.g. [78]), but is otherwise  
333 an important consideration for future taxonomic assignment of metabarcoding reads and for  
334 completing reference barcode databases (e.g. following BOLD guidelines, see [50,79]).  
335 Vouchering also provides a resource for potential parallel efforts to generate high-throughput  
336 specimen-based genomic resources (i.e. partial or complete genomes, microbiomes, diet) for sites  
337 of special interest (SuperGOs, [13]). Vouchered barcode sequences are also of particular relevance  
338 for bioinformatic processing of metabarcode reads. It has been demonstrated that such sequences  
339 are fundamental for efficient and validated filtering of nuclear copies of mitochondrial sequences,  
340 and that they control for taxonomically inflated estimates of community composition [80]. While  
341 sample processing is not the most problematic step for cross-contamination, contamination issues  
342 have been reported (e.g. [81]), and at least basic equipment cleaning between samples is required.  
343 See Table 3 for key guidelines and recommendations of the arthropod community sample  
344 processing submodule.

345 **Table 3.** Summary of key guidelines and recommendations within the *2.1 Arthropod community*  
 346 *sample processing submodule.*

| <b>2.1 Arthropod community sample processing submodule</b> |                                                                                             |
|------------------------------------------------------------|---------------------------------------------------------------------------------------------|
| Sample wet mass weight                                     | 20 µm nylon filtration fabric                                                               |
| Sample photography                                         | White background<br>Ethanol submerged (white tray)<br>Photographic scale                    |
| Size sorting                                               | Minimise size sorting<br>4 mm sieve                                                         |
| Vouchering specimens                                       | Random or directed selection of specimens for being individually DNA extracted and barcoded |

347

348 **3. DNA extraction**

349 A fundamental consideration for harmonising wocDNA extraction concerns whether a pre-  
 350 extraction homogenisation-grinding step (thus implying destruction of the specimens within an  
 351 arthropod community sample) is needed. Such a step can facilitate homogeneous digestion across  
 352 specimens, and reduce digestion volumes. It is often achieved through manual grinding in a mortar  
 353 after freezing in liquid nitrogen, or grinding in ethanol, or mechanical bead beating. Non-  
 354 destructive extraction protocols have been developed for unsorted arthropod samples to maintain  
 355 exoskeletal integrity (e.g. [61,70,82]). Using mock arthropod community samples generated from  
 356 material collected in Malaise traps, Nielsen et al., [82] found that homogenised samples yielded  
 357 more DNA, but generally produced more inconsistent results when compared to non-destructive  
 358 extraction. When assessing the recovered taxonomic content of samples (operational taxonomic  
 359 units, OTUs), intact samples performed at least comparable to, if not better than, homogenised  
 360 samples. Thus, considering that efficiency seems to be comparable, avoiding a homogenisation  
 361 step will (i) reduce potential heterogeneity among studies, (ii) reduce processing time, (iii) reduce  
 362 contamination risk, and (iv) maintain a physical archive accessible for future developments in

363 image classification using deep learning for the extraction of additional data, such as abundances  
364 (see 2. Sample processing). Given these considerations, non-destructive DNA extraction should  
365 be a core feature of the arthropod community sample DNA extraction submodule. When necessary  
366 (e.g. soil arthropods where a large fraction have hard exoskeletons, see [83]), semi-destructive or  
367 destructive extraction submodules will need to be developed. Non-destructive DNA extractions  
368 require large volumes of digestion buffer to extract wocDNA. Nielsen et al. [82] have  
369 demonstrated that OTU diversity estimates are not influenced by the (sub)volume of digestion  
370 buffer that is subsequently purified. Given this consideration, typical commercial kit extraction  
371 volumes of 100-200  $\mu$ l can be considered appropriate for harmonisation.

372         A broad range of DNA extraction protocols are being applied to wocDNA metabarcoding.  
373 It remains unclear how different extraction methods might impact downstream results, as there is  
374 contrasting evidence on its importance based on eDNA approaches [18,84]. Manual (column-  
375 based) and robotic (bead-based) implementations of the Qiagen DNeasy Blood & Tissue kit and  
376 homologous kits have been widely used for extracting wocDNA of terrestrial invertebrates [33].  
377 There is little evidence for PCR inhibitor issues for DNA extracts from arthropod community  
378 samples (but see [85]), and if they occur they can be appropriately accounted for through dilution  
379 of DNA extracts before PCR amplification (see next section). Given these considerations, simple  
380 and efficient kit-based protocols that allow sample extraction at scale (e.g. Qiagen DNeasy Blood  
381 & Tissue, and analogous kits, see [86]) provide an appropriate basis for harmonisation. Negative  
382 controls and technical replicates are fundamental for quality control and can be used to filter out  
383 artefactual sequences [87], and as such their incorporation in the extraction step will also facilitate  
384 validation and integration of data across studies.

385         Biobanking of DNA from environmental samples has been strongly advocated for long-  
386 term biomonitoring [88]. Biobanking of DNA ensures opportunities for re-analysis of past data  
387 sets with future technologies, an important consideration given high method turnover and

388 associated comparability issues. Aliquots of purified wocDNA are suitable for archiving, ideally  
 389 using low-DNA binding tubes and freezers of -80 °C or colder, but if this option is unavailable,  
 390 storage at -20 °C in non-defrosting freezers provides an adequate alternative. Several museums are  
 391 already offering this service with affordable pricing (e.g. Smithsonian & Canadian museum in  
 392 Ottawa). See Table 4 for key guidelines and recommendations for the arthropod community  
 393 sample DNA extraction submodule.

394 **Table 4.** Summary of key guidelines and recommendations proposed within the *3.1 Arthropod*  
 395 *community sample DNA extraction submodule*.

| <b>3.1 Arthropod community sample DNA extraction submodule</b> |                                                                                                                         |
|----------------------------------------------------------------|-------------------------------------------------------------------------------------------------------------------------|
| Digestion                                                      | No physical homogenisation step<br>High volumes of digestion buffer<br>Long digestion (shaking)                         |
| Purification                                                   | 200µl of digestion buffer<br>Qiagen DNeasy Blood & Tissue type<br>Negative controls and technical extraction replicates |
| Purified DNA storage                                           | Biobanking of DNA aliquots<br>-80°, -20° non-defrosting freezers                                                        |

396

#### 397 **4. Amplification, library preparation and sequencing**

398 There is a clear trend toward the use of the Cytochrome c oxidase subunit I barcode region (COI-  
 399 bcr) for wocDNA metabarcoding of arthropods (e.g. [37,40,83,89–92]). This can be largely  
 400 attributed to: (i) the good performance of different COI primers for arthropod community samples,  
 401 (ii) the availability of large COI- bcr reference databases; (iii) sufficient variation to typically  
 402 allow taxonomic assignment at the species level, and; (iv) the potential to identify and remove  
 403 sequencing errors and spurious sequence assemblies by bioinformatic processing based on the  
 404 predicted variation in protein- coding regions and the limited expected length variation within the  
 405 COI- bcr [89]. Multiple primer sets have been demonstrated to work efficiently to characterise  
 406 arthropod community samples, particularly degenerate (some positions include several possible

407 bases) primers (see Elbrecht et al., [37], Figure 2), with a trend toward using the second half of the  
408 COI barcode for metabarcoding studies (e.g. [40,93]). The BF3 fragment (418 bp) provides better  
409 taxonomic resolution than other overlapping fragments, primers within this region are also  
410 unaffected by slippage, and provide maximum overlap across already published studies. Given  
411 these considerations, choosing primers of demonstrated efficiency within the BF3 region (BF3 +  
412 BF2 or III\_B\_F + Fol-degen-rev, among others), or that overlap substantially with it, offer high  
413 potential for harmonising across independent studies.

414 PCR conditions are strongly dependent on selected primers, but also on sample  
415 composition and polymerase used. Ideally, PCR annealing temperatures and cycle numbers should  
416 be qPCR-optimized [94]. However, in the absence of such optimization, steps can be taken to  
417 reduce unneeded variability across studies. The number of PCR cycles should be maintained at or  
418 below 30 cycles if possible, to limit the formation of intra-sample chimeras ([95], reviewed in [5]).  
419 Serial dilution is a beneficial strategy, as DNA concentration from arthropod community samples,  
420 together with PCR inhibitors can be high, potential inhibitors can be effectively diluted out (e.g.,  
421 [96]). Comparisons of polymerase performance for eDNA metabarcoding [97] has revealed that  
422 polymerase choice impacts read abundance, but not occurrence. Among six commercially  
423 available polymerases tested, Qiagen Multiplex Master Mix has been shown to provide the most  
424 accurate estimates of relative abundance, but also generated the highest error rate (ref). While  
425 high-fidelity DNA polymerases can reduce PCR error rates [97,98], their proofreading activity  
426 (non 3'→5' exonuclease activity) can increase the rate of chimera formation [99,100]. PCR volume  
427 does not appear to be an important consideration for harmonisation as it has been reported that it  
428 does not influence downstream results, but provides opportunity for cost savings via PCR  
429 miniaturisation ([101], Table 5).

430 Performing PCR replicates and pooling for further library preparation or sequencing is a  
431 well-established standard in the metabarcoding literature, particularly for arthropod community

432 samples, with strong recommendations for a minimum pooling of three PCR replicates [102,103].  
433 The use of multiple PCR replicates per sample to be individually sequenced (technical replication)  
434 is less common, but their importance has been highlighted. Together with PCR negative controls,  
435 technical PCR replicates can provide important quality control for the removal of PCR and  
436 sequencing artefacts [87,94,104]. Thus, negative controls and technical replication within  
437 individual sequencing runs should be considered essential practice to identify potential biases and  
438 errors from (i) cross-contamination, (ii) tag-jumping events [105] and (iii) false-negative detection.  
439 Given the high potential for cross contamination within the PCR step, rigorous measures should  
440 be taken to minimise this risk (e.g. using filter tips, robotic platforms for plate aliquoting). Cross-  
441 contamination can be detected and filtered out by including technical replicates, together with  
442 positive and negative controls randomly distributed among different plates to bioinformatically  
443 curate data, reducing problems associated with tag switching and/or cross-contamination [106].  
444 These should be included in the laboratory and sequencing workflow (e.g. [107]). An important  
445 measure that enables one to filter out potential contamination during data processing is to use  
446 different nucleotide tag and/or library index combinations for individual PCR replicates within  
447 samples, as this will allow for restrictive sequence processing across each replicate [87,104].  
448 Similarly, the number of reads assigned to a given tag/library index combination that were not  
449 used in the study can provide an estimation of the contamination rate, and thus a minimum OTU  
450 relative abundance that should be considered as reliable [108]. Mock communities have been  
451 investigated as positive controls for estimating recovery bias, and the use of synthetic/exogenous  
452 internal standards has also been explored to estimate absolute abundance from metabarcode data  
453 [10,109,110]. In the context of harmonisation across studies, universal positive controls harbour  
454 much potential for inter-calibration. This has yet to be developed and tested, but could be the basis  
455 for further improvement within this submodule.

456 Library preparation involves the addition of sample-specific nucleotide identifiers to  
457 amplicons and nucleotide tails for sequencing, for which there is considerable heterogeneity in the  
458 arthropod wocDNA metabarcoding literature. In their recent review, Bohmann et al., [106]  
459 identified and reviewed three main approaches to achieve sample-specific labelling and library  
460 preparation in metabarcoding studies. These include: (i) a one-step PCR approach in which sample  
461 DNA extracts are amplified, tagged and built into sequence libraries in a single PCR reaction with  
462 fusion primers, then pooled and sequenced; (ii) a two-step PCR, in which sample DNA extracts  
463 are PCR-amplified with two primer sets: a first PCR with metabarcoding primers carrying the 5'  
464 sequence overhangs and no nucleotide tags; and a second PCR using sequence overhangs, allowing  
465 the amplicons to be indexed (i5 and i7 indexes), and; (iii) a tagged PCR approach, in which DNA  
466 extracts are PCR amplified with metabarcoding primers that carry 5' nucleotide tags, individually  
467 tagged PCR products are then pooled, and PCR-based or ligation-based library preparation is  
468 performed for pools of 5' tagged amplicons.

469 All three labelling strategies have been used for arthropod wocDNA metabarcoding (e.g.  
470 [70,94,111]). The two-step approach, which is based on the Illumina 16S rRNA protocol,  
471 originally developed for microbiome studies, appears to be more commonly used. Tests comparing  
472 consistency and taxon detection efficiency between one step and two step PCR protocols (in this  
473 case implementing TrueSeq nano over first untagged PCR) using mock arthropod samples reveal  
474 better performance with the two step protocol [25]. Ligation-based tagged PCR library  
475 preparations have been advocated, to avoid false assignment of sequences to samples by tag  
476 jumping [94,112], a recognised problem within the PCR-based tagged approach [105,106].  
477 However, no study has yet compared performance between two-step and ligation-based tagged  
478 PCR. Between these two, the two-step approach is the more frequently used for arthropod  
479 metabarcoding, and thus provides a suitable approach to minimise heterogeneity across studies  
480 (Table 5).

481 The sequencing depth needed to recover all taxa is strongly dependent on the diversity and  
 482 complexity of a given sample. A sequencing depth of 60,000 ± 55,000 reads per amplicon per  
 483 sample is commonly reported [113]. Increasing sequencing depth can increase the detection rate  
 484 of low-abundance taxa and reduce the impacts of differential processing protocols on perceived  
 485 diversity [40]. However, increased sequencing depth inherently increases the detection of  
 486 artefactual sequences, requiring additional procedures for their removal [5,80,104]. Distinguishing  
 487 between sufficient or insufficient sequencing depth can be controlled for by evaluating  
 488 replicability [40]. The choice of sequencing platform also has potential to generate variation  
 489 among data sets. This variation appears to be limited across currently popular platforms, such as  
 490 Illumina MiSeq, Ion Torrent PGM and Ion Torrent S5 [40]. However, as future sequencing  
 491 platforms may present greater variation, it is important to report such details (e.g. sequencing  
 492 platform, read length). See Table 5 for key guidelines and recommendations of the arthropod  
 493 community sample DNA amplification, library preparation and sequencing submodule.

494 **Table 5.** Summary of key guidelines and recommendations proposed within the *4.1 Arthropod*  
 495 *community sample DNA amplification, library preparation and sequencing submodule.*

| <b>4.1 Arthropod community sample DNA amplification, library preparation and sequencing submodule</b> |                                                                                                                                                                                                                                  |
|-------------------------------------------------------------------------------------------------------|----------------------------------------------------------------------------------------------------------------------------------------------------------------------------------------------------------------------------------|
| Target DNA fragments and primers                                                                      | COI locus<br>BC3 fragment<br>Degenerate primers                                                                                                                                                                                  |
| PCR conditions                                                                                        | Minimize number of PCR cycles<br>Dilution of DNA extract<br>Non-proofreading Taq<br>PCR replicates (3), ideally individually labelled<br>Negative controls<br>Technical PCR replication<br>Cross-contamination control practices |
| Library preparation                                                                                   | Two-step protocol                                                                                                                                                                                                                |

496

497 **5. Metadata and DNA sequence sharing and storage**



498 Metadata associated with the different steps of generating metabarcode data should be reported  
499 with DNA sequence data to enhance long term reuse value (see [114]). The GEOME (Genomic  
500 Observatories Metadatabase) initiative [15,16] offers a very useful platform, facilitating findable,  
501 accessible, interoperable and reusable data archival practices (i.e. FAIR principles).  
502 Interoperability is central to GEOME, as metadata follow controlled vocabularies consistent with  
503 DarwinCore and MIxS standards [115,116] and new records on GEOME are incorporated into the  
504 Global Biodiversity Information Facility, GBIF (<https://www.gbif.org/>). A customizable but  
505 standard-compliant single spreadsheet for metainformation, including (i) the reference to the  
506 submodules implemented within each data acquisition steps (e.g. 1.2 sample acquisition  
507 submodule, 2.1 sample processing submodule, etc) and (ii) all key information highlighted within  
508 each of the submodules, will facilitate downstream comparison among data sets. The metadata  
509 spreadsheet for the terrestrial arthropod module (GeOME spreadsheet) can be additionally  
510 included as supplementary publication material.

511 Finally, GEOME also facilitates DNA data sharing through the deposition of raw genetic  
512 data to the Sequence Read Archive (SRA, [www.ncbi.nlm.nih.gov/sra](http://www.ncbi.nlm.nih.gov/sra)), while maintaining  
513 persistent links to standard compliant metadata held in the GEOME database. SRA is thus an ideal  
514 platform for the storage of demultiplexed HTS files. Given the continuous development and  
515 improvement of bioinformatic tools for HTS data analysis, public archiving of raw DNA data is  
516 important to facilitate future synthetic analysis across historical data sets. See Table 6 for key  
517 guidelines and recommendations of the arthropod community sample metadata and DNA sequence  
518 sharing and storage submodule.

519 **Table 6.** Summary of key guidelines and recommendations proposed within the *5.1 Arthropod*  
520 *community sample Metadata and DNA sequence sharing and storage submodule.*

|                                                                                                      |
|------------------------------------------------------------------------------------------------------|
| <p><b>5.1 Arthropod community sample Metadata and DNA sequence sharing and storage submodule</b></p> |
|------------------------------------------------------------------------------------------------------|

|               |                                                                                                  |
|---------------|--------------------------------------------------------------------------------------------------|
| Metadata      | GeOME metadata submission<br>GeOME spreadsheet with the key information of the modules performed |
| DNA sequences | Raw data<br>SRA                                                                                  |

521

## 522 **Conclusions**

523 Whole organism community DNA (wocDNA) metabarcoding is emerging as a powerful tool to  
524 characterise and compare arthropod communities, from the scale of local community composition  
525 through to global comparative analyses. For this potential to be fully realised, comparability across  
526 data sets generated by independent research groups is a fundamental prerequisite. There are several  
527 challenges to achieve this. Firstly, as is the case for many new fields, early development has led  
528 to different strategies and tools, among which some will facilitate data comparability, while others  
529 will not. Here we address this by suggesting a modular framework that seeks to reduce redundant  
530 efforts and improve comparability across studies by canalising common practice across different  
531 research initiatives, where that practice demonstrates utility. We illustrate this framework with  
532 recommendations for a module for the characterisation of terrestrial arthropods. A second  
533 challenge is that canalisation of different practises to optimise comparability at the community  
534 level may, inadvertently, limit flexibility at the scale of individual studies. While this is to some  
535 extent unavoidable, the flexible submodule structure of our modular framework seeks to broaden  
536 the applicability of modules within the wocDNA metabarcoding community. Finally, unless  
537 appropriate data and metadata are provided for a given wocDNA metabarcode study, the  
538 opportunities for integrative analyses across historical data sets are likely to be limited. We address  
539 this challenge by advocating good reporting practice, and highlight that the submodule structure  
540 of modules provides a framework for the incorporation of new advances as they emerge within the  
541 field of metabarcoding. We advocate the adoption and development of the terrestrial arthropod  
542 module that we propose here, as an important step toward harmonisation of metabarcode data. We

543 further encourage the development of modules for other biodiversity fractions that are appropriate  
544 targets for wocDNA metabarcoding.

545

#### 546 **Declarations:**

#### 547 **Data Availability**

548 Not applicable

#### 549 **Competing interests**

550 A.P.V. is a co- founder and scientific advisor of NatureMetrics, a private company providing  
551 commercial services in DNA- based monitoring. The authors declare that they have no other  
552 conflicts of interest.

#### 553 **Funding**

554 The working group “Toward harmonisation for the generation of metabarcoding data: Soil  
555 Biodiversity and Terrestrial Arthropod modules” held in November 2020 (online) was organized  
556 by the iBioGen project, which has received funding from the European Union’s Horizon 2020  
557 research and innovation programme under grant agreement No. 810729.

#### 558 **Authors' contributions**

559 P.A. and B.C.E. conceptualized the manuscript. All authors contributed to the ideas and discussion  
560 of this review. P.A. and B.C.E. coordinated the working group meetings and led the writing with  
561 contributions from all authors. All authors read and approved the final manuscript.

#### 562 **Acknowledgements**

563 Not applicable

564

#### 565 **Figure legends**

566

567 **Figure 1. A harmonised framework with a “modular” structure for metazoan**  
568 **metabarcoding.** Schematic representation of the modular structure proposed for building a  
569 harmonised framework for the generation of metabarcode data for different fractions of terrestrial  
570 animals. Different fractions of terrestrial animal diversity are at the core of each “module” (red  
571 rectangle) and within such a framework, best practices and harmonised protocols are developed as  
572 submodules (black squares). Submodules within each module serve as the fundamental building  
573 blocks that provide guidelines and recommendations for the five, well-defined steps for generating  
574 metabarcode data. Within this framework, tailored data generation pipelines can be configured  
575 within a module, drawn from the set of alternative submodules.

576

## 577 **References**

- 578 1. Ji Y, Ashton L, Pedley SM, Edwards DP, Tang Y, Nakamura A, et al.. Reliable, verifiable and  
579 efficient monitoring of biodiversity via metabarcoding. *Ecol Lett.* 2013; doi: 10.1111/ele.12162.
- 580 2. Porter TM, Hajibabaei M. Scaling up: A guide to high-throughput genomic approaches for  
581 biodiversity analysis. *Mol Ecol.* 2018; doi: 10.1111/mec.14478.
- 582 3. Bohan DA, Vacher C, Tamaddoni-Nezhad A, Raybould A, Dumbrell AJ, Woodward G. Next-  
583 Generation Global Biomonitoring: Large-scale, Automated Reconstruction of Ecological  
584 Networks. *Trends Ecol Evol.* 2017; doi: 10.1016/j.tree.2017.03.001.
- 585 4. Bush A, Sollmann R, Wilting A, Bohmann K, Cole B, Balzter H, et al.. Connecting Earth  
586 observation to high-throughput biodiversity data. *Nat Ecol Evol.* Macmillan Publishers Limited;  
587 2017; doi: 10.1038/s41559-017-0176.
- 588 5. Taberlet P, Bonin A, Zinger L, Coissac E. Environmental DNA for biodiversity research and  
589 monitoring. *Environ. DNA Biodivers. Res. Monit.* Oxford: Oxford University Press;
- 590 6. Bush A, Catullo R, Mokany K, Harwood T, Hoskins AJ, Ferrier S. Incorporating existing  
591 thermal tolerance into projections of compositional turnover under climate change. *Glob Ecol*

- 592 *Biogeogr.* 2019; doi: 10.1111/geb.12898.
- 593 7. Piper AM, Batovska J, Cogan NOI, Weiss J, Cunningham JP, Rodoni BC, et al.. Prospects and  
594 challenges of implementing DNA metabarcoding for high-throughput insect surveillance.  
595 *Gigascience*. Oxford University Press; 2019; doi: 10.1093/gigascience/giz092.
- 596 8. Gilbert JA, Jansson JK, Knight R. The Earth Microbiome project: Successes and aspirations.  
597 *BMC Biol.* 2014; doi: 10.1186/s12915-014-0069-1.
- 598 9. Gilbert JA, Meyer F, Antonopoulos D, Balaji P, Brown CT, Brown CT, et al.. Meeting  
599 Report: The Terabase Metagenomics Workshop and the Vision of an Earth Microbiome Project.  
600 *Stand Genomic Sci.* 2010; doi: 10.4056/sigs.1433550.
- 601 10. Ovaskainen O, Abrego N, Somervuo P, Palorinne I, Hardwick B, Pitkänen JM, et al..  
602 Monitoring Fungal Communities With the Global Spore Sampling Project. *Front Ecol Evol.*  
603 2020; doi: 10.3389/fevo.2019.00511.
- 604 11. Davies N, Meyer C, Gilbert JA, Amaral-Zettler L, Deck J, Bickel M, et al.. A call for an  
605 international network of genomic observatories (GOs). *Gigascience*. 2012; doi: 10.1186/2047-  
606 217X -1-5.
- 607 12. Davies N, Field D, Amaral-Zettler L, Clark MS, Deck J, Drummond A, et al.. The founding  
608 charter of the Genomic Observatories Network. *Gigascience*. 2014; doi: 10.1186/2047-217X-3-  
609 2.
- 610 13. Arribas P, Andújar C, Bidartondo MI, Bohmann K, Coissac E, Creer S, et al.. Connecting  
611 high-throughput biodiversity inventories – opportunities for a site-based genomic framework for  
612 global integration and synthesis. *Mol Ecol.* in press2021;
- 613 14. Guralnick R, Walls R, Jetz W. Humboldt Core – toward a standardized capture of biological  
614 inventories for biodiversity monitoring, modeling and assessment. *Ecography (Cop)*. 2018; doi:  
615 10.1111/ecog.02942.
- 616 15. Deck J, Gaither MR, Ewing R, Bird CE, Davies N, Meyer C, et al.. The Genomic

617 Observatories Metadatabase (GeOMe): A new repository for field and sampling event metadata  
618 associated with genetic samples. *PLoS Biol.* 2017; doi: 10.1371/journal.pbio.2002925.

619 16. Riginos C, Crandall ED, Liggins L, Gaither MR, Ewing RB, Meyer C, et al.. Building a  
620 global genomics observatory: Using GEOME (the Genomic Observatories Metadatabase) to  
621 expedite and improve deposition and retrieval of genetic data and metadata for biodiversity  
622 research. *Mol Ecol Resour.* 2020; doi: 10.1111/1755-0998.13269.

623 17. Caporaso JG, Paszkiewicz K, Field D, Knight R, Gilbert JA. The Western English Channel  
624 contains a persistent microbial seed bank. *ISME J.* Nature Publishing Group; 2012; doi:  
625 10.1038/ismej.2011.162.

626 18. Marotz C, Amir A, Humphrey G, Gaffney J, Gogul G, Knight R. DNA extraction for  
627 streamlined metagenomics of diverse environmental samples. *Biotechniques.* 2017; doi:  
628 10.2144/000114559.

629 19. Alberti A. to metazoan marine plankton nucleotide sequences from the Tara Oceans  
630 expedition. *Sci Data.* 4:1700932017;

631 20. Gorsky G, Bourdin G, Lombard F, Pedrotti ML, Audrain S, Bin N, et al.. Expanding Tara  
632 Oceans Protocols for Underway, Ecosystemic Sampling of the Ocean-Atmosphere Interface  
633 During Tara Pacific Expedition (2016–2018). *Front Mar Sci.* 2019; doi:  
634 10.3389/fmars.2019.00750.

635 21. Kopf A. The ocean sampling day consortium. *Gigascience.* 2015; doi: 10.1186/s13742-015-  
636 0065-6.

637 22. Dickie IA, Boyer S, Buckley HL, Duncan RP, Gardner PP, Hogg ID, et al.. Towards robust  
638 and repeatable sampling methods in eDNA based studies. *Mol Ecol Resour.* 2018; doi:  
639 10.1111/1755-0998.12907.

640 23. Canonico G, Buttigieg PL, Montes E, Muller-Karger FE, Stepien C, Wright D, et al.. Global  
641 observational needs and resources for marine biodiversity. *Front Mar Sci.* 2019; doi:

642 10.3389/fmars.2019.00367.

643 24. Murray DC, Coghlan ML, Bunce M. From benchtop to desktop: Important considerations  
644 when designing amplicon sequencing workflows. *PLoS One*. 2015; doi:  
645 10.1371/journal.pone.0124671.

646 25. Zizka VMA, Elbrecht V, Macher JN, Leese F. Assessing the influence of sample tagging and  
647 library preparation on DNA metabarcoding. *Mol Ecol Resour*. 2019; doi: 10.1111/1755-  
648 0998.13018.

649 26. Blackman RC, Mächler E, Altermatt F, Arnold A, Beja P, Boets P, et al.. Advancing the use  
650 of molecular methods for routine freshwater macroinvertebrate biomonitoring – the need for  
651 calibration experiments. *Metabarcoding and Metagenomics*. 2019; doi: 10.3897/mbmg.3.34735.

652 27. Zaiko A, Greenfield P, Abbott C, von Ammon U, Bilewitch J, Bunce M, et al.. Towards  
653 reproducible metabarcoding data: Lessons from an international cross-laboratory experiment.  
654 *Mol Ecol Resour*. 2021; doi: 10.1111/1755-0998.13485.

655 28. Philippot L, Ritz K, Pandard P, Hallin S, Martin-Laurent F. Standardisation of methods in  
656 soil microbiology: Progress and challenges. *FEMS Microbiol Ecol*. 2012; doi: 10.1111/j.1574-  
657 6941.2012.01436.x.

658 29. Stork NE, McBroom J, Gely C, Hamilton AJ. New approaches narrow global species  
659 estimates for beetles, insects, and terrestrial arthropods. *Proc Natl Acad Sci*. 2015; doi:  
660 10.1073/pnas.1502408112.

661 30. Goulson D. The insect apocalypse, and why it matters. *Curr Biol*. Elsevier; 2019; doi:  
662 10.1016/j.cub.2019.06.069.

663 31. Harvey JA, Heinen R, Armbrrecht I, Basset Y, Baxter-Gilbert JH, Bezemer TM, et al..  
664 International scientists formulate a roadmap for insect conservation and recovery. *Nat Ecol Evol*.  
665 2020; doi: 10.1038/s41559-019-1079-8.

666 32. Seebens H, Blackburn TM, Dyer EE, Genovesi P, Hulme PE, Jeschke JM, et al.. Global rise

667 in emerging alien species results from increased accessibility of new source pools. *Proc Natl*  
668 *Acad Sci U S A*. 2018; doi: 10.1073/pnas.1719429115.

669 33. Liu M, Clarke LJJ, Baker SC, Jordan GJG, Burrige CPCP. A practical guide to DNA  
670 metabarcoding for entomological ecologists. *Ecol Entomol*. 2019; doi: 10.1111/een.12831.

671 34. Creedy TJ, Andújar C, Meramveliotakis E, Noguerales V, Overcast I, Papadopoulou A, et  
672 al.. Coming of age for COI metabarcoding of whole organism community DNA: towards  
673 bioinformatic harmonisation. *Mol Ecol Resour*. 2021; doi: 10.1111/1755-0998.13502.

674 35. Yu DW, Ji Y, Emerson BC, Wang X, Ye C, Yang C, et al.. Biodiversity soup: metabarcoding  
675 of arthropods for rapid biodiversity assessment and biomonitoring. *Methods Ecol Evol*. 2012;  
676 doi: 10.1111/j.2041-210X.2012.00198.x.

677 36. Andújar C, Arribas P, Gray C, Bruce C, Woodward G, Yu DW, et al.. Metabarcoding of  
678 freshwater invertebrates to detect the effects of a pesticide spill. *Mol Ecol*. 2018; doi:  
679 10.1111/mec.14410.

680 37. Elbrecht V, Braukmann TW, Ivanova N V, Prosser SW, Hajibabaei M, Wright M, et al..  
681 Validation of COI metabarcoding primers for terrestrial arthropods. *PeerJ*. PeerJ Inc.; 2019; doi:  
682 10.7287/peerj.preprints.27801v1.

683 38. Krehenwinkel H, Fong M, Kennedy S, Huang EG, Noriyuki S, Cayetano L, et al.. The effect  
684 of DNA degradation bias in passive sampling devices on metabarcoding studies of arthropod  
685 communities and their associated microbiota. *PLoS One*. 2018; doi:  
686 10.1371/journal.pone.0189188.

687 39. Krehenwinkel H, Kennedy SR, Rueda A, Lam A, Gillespie RG. Scaling up DNA barcoding  
688 – Primer sets for simple and cost efficient arthropod systematics by multiplex PCR and Illumina  
689 amplicon sequencing. *Methods Ecol Evol*. 2018; doi: 10.1111/2041-210X.13064.

690 40. Braukmann TWA, Ivanova N V., Prosser SWJ, Elbrecht V, Steinke D, Ratnasingham S, et  
691 al.. Metabarcoding a diverse arthropod mock community. *Mol Ecol Resour*. 2019; doi:



692 10.1111/1755-0998.13008.

693 41. D'Souza ML, van der Bank M, Shongwe Z, Rattray RD, Stewart R, van Rooyen J, et al..  
694 Biodiversity baselines: Tracking insects in Kruger National Park with DNA barcodes. *Biol*  
695 *Conserv.* 2021; doi: 10.1016/j.biocon.2021.109034.

696 42. Basset Y, Springate ND, Aberlenc HP, Delvare G. A review of methods for sampling  
697 arthropods in tree canopies. In: Strok NE, Adis J, Didham RK, editors. *Canopy Arthropods*.  
698 London: Chapman and Hall;

699 43. Montgomery GA, Belitz MW, Guralnick RP, Tingley MW. Standards and Best Practices for  
700 Monitoring and Benchmarking Insects. *Front Ecol Evol.* 2021; doi: 10.3389/fevo.2020.579193.

701 44. Geiger MF, Moriniere J, Hausmann A, Haszprunar G, Wägele W, Hebert PDN, et al..  
702 Testing the Global Malaise Trap Program - How well does the current barcode reference library  
703 identify flying insects in Germany? *Biodivers Data J.* 2016; doi: 10.3897/BDJ.4.e10671.

704 45. Marquina D, Esparza- Salas R, Roslin T, Ronquist F. Establishing arthropod community  
705 composition using metabarcoding: Surprising inconsistencies between soil samples and  
706 preservative ethanol and homogenate from Malaise trap catches. *Mol Ecol Resour.* 2019; doi:  
707 10.1111/1755-0998.13071.

708 46. Barsoum N, Bruce C, Forster J, Ji YQ, Yu DW. The devil is in the detail: Metabarcoding of  
709 arthropods provides a sensitive measure of biodiversity response to forest stand composition  
710 compared with surrogate measures of biodiversity. *Ecol Indic.* Elsevier; 2019; doi:  
711 10.1016/j.ecolind.2019.01.023.

712 47. Ritter CD, Häggqvist S, Karlsson D, Sääksjärvi IE, Muasya AM, Nilsson RH, et al..  
713 Biodiversity assessments in the 21st century: The potential of insect traps to complement  
714 environmental samples for estimating eukaryotic and prokaryotic diversity using high-  
715 throughput DNA metabarcoding. *Genome.* 2019; doi: 10.1139/gen-2018-0096.

716 48. Watts C, Dopheide A, Holdaway R, Davis C, Wood J, Thornburrow D, et al.. DNA

717 metabarcoding as a tool for invertebrate community monitoring: a case study comparison with  
718 conventional techniques. *Austral Entomol.* 2019; doi: 10.1111/aen.12384.

719 49. Hausmann A, Seegerer AH, Greifenstein T, Knubben J, Morinière J, Bozicevic V, et al..  
720 Toward a standardized quantitative and qualitative insect monitoring scheme. *Ecol Evol.* 2020;  
721 doi: 10.1002/ece3.6166.

722 50. DeWaard JR, Levesque-Beaudin V, DeWaard SL, Ivanova N V., McKeown JTA, Miskie R,  
723 et al.. Expedited assessment of terrestrial arthropod diversity by coupling Malaise traps with  
724 DNA barcoding. *Genome.* 2019; doi: 10.1139/gen-2018-0093.

725 51. Malaise R. A new insect-trap. *Entomol Tidskr.* 58:148–601937;

726 52. Schmidt O, Schmidt S, Häuser CL, Hausmann A, Van Vu L. Using Malaise traps for  
727 collecting Lepidoptera (Insecta), with notes on the preparation of Macrolepidoptera from  
728 ethanol. *Biodivers Data J.* 2019; doi: 10.3897/BDJ.7.e32192.

729 53. Karlsson D, Forshage M, Holston K, Ronquist F. The data of the Swedish Malaise Trap  
730 Project, a countrywide inventory of Sweden’s insect fauna. *Biodivers Data J.* 2020; doi:  
731 10.3897/bdj.8.e56286.

732 54. Hoekman D, Levan KE, Ball GE, Browne RA, Davidson RL, Erwin TL, et al.. Design for  
733 ground beetle abundance and diversity sampling within the National Ecological Observatory  
734 Network. *Ecosphere.* 2017; doi: 10.1002/ecs2.1744.

735 55. Nakamura S, Tamura S, Taki H, Shoda-Kagaya E. Propylene glycol: a promising  
736 preservative for insects, comparable to ethanol, from trapping to DNA analysis. *Entomol Exp*  
737 *Appl.* 2020; doi: 10.1111/eea.12876.

738 56. Steinke D, Braukmann TWA, Manerus L, Woodhouse A, Elbrecht V. Effects of Malaise trap  
739 spacing on species richness and composition of terrestrial arthropod bulk samples.  
740 *Metabarcoding and Metagenomics.* 2021; doi: 10.3897/MBMG.5.59201.

741 57. Szewczyk TM, McCain CM. Disentangling elevational richness: a multi-scale hierarchical

742 Bayesian occupancy model of Colorado ant communities. *Ecography (Cop)*. 2019; doi:  
743 10.1111/ecog.04115.

744 58. Powney GD, Carvell C, Edwards M, Morris RKA, Roy HE, Woodcock BA, et al..  
745 Widespread losses of pollinating insects in Britain. *Nat Commun*. Springer US; 2019; doi:  
746 10.1038/s41467-019-08974-9.

747 59. Weißbecker C, Buscot F, Wubet T. Preservation of nucleic acids by freeze-drying for next  
748 generation sequencing analyses of soil microbial communities. *J Plant Ecol*. 2017; doi:  
749 10.1093/jpe/rtw042.

750 60. Marquina D, Buczek M, Ronquist F, Lukasik P. The effect of ethanol concentration on the  
751 morphological and molecular preservation of insects for biodiversity studies. *PeerJ*. 2021; doi:  
752 10.7717/peerj.10799.

753 61. Martoni F, Nogarotto E, Piper AM, Mann R, Valenzuela I, Eow L, et al.. Propylene Glycol  
754 and Non-Destructive DNA Extractions Enable Preservation and Isolation of Insect and Hosted  
755 Bacterial DNA. *Agric*. 2021; doi: 10.3390/agriculture11010077.

756 62. de Kerdrel GA, Andersen JC, Kennedy SR, Gillespie R, Krehenwinkel H. Rapid and cost-  
757 effective generation of single specimen multilocus barcoding data from whole arthropod  
758 communities by multiple levels of multiplexing. *Sci Rep*. 2020; doi: 10.1038/s41598-019-54927-  
759 z.

760 63. Hertz M. Huomioita petokuoriaisten olinpaikoista. *Luonnon Yst*. 31:218–221927;

761 64. Brooks DR, Bater JE, Clark SJ, Monteith DT, Andrews C, Corbett SJ, et al.. Large carabid  
762 beetle declines in a United Kingdom monitoring network increases evidence for a widespread  
763 loss in insect biodiversity. *J Appl Ecol*. 2012; doi: 10.1111/j.1365-2664.2012.02194.x.

764 65. Brown GR, Matthews IM. A review of extensive variation in the design of pitfall traps and a  
765 proposal for a standard pitfall trap design for monitoring ground-active arthropod biodiversity.  
766 *Ecol Evol*. 2016; doi: 10.1002/ece3.2176.

767 66. Ward DF, New TR, Yen AL. Effects of pitfall trap spacing on the abundance, richness and  
768 composition of invertebrate catches. *J Insect Conserv.* 2001; doi: 10.1023/A:1011317423622.

769 67. Hohbein RR, Conway CJ. Pitfall traps: A review of methods for estimating arthropod  
770 abundance. *Wildl Soc Bull.* 2018; doi: 10.1002/wsb.928.

771 68. Missa O, Basset Y, Alonso A, Miller SE, Curletti G, De Meyer M, et al.. Monitoring  
772 arthropods in a tropical landscape: Relative effects of sampling methods and habitat types on  
773 trap catches. *J Insect Conserv.* 2009; doi: 10.1007/s10841-007-9130-5.

774 69. Deagle BE, Thomas AC, McInnes JC, Clarke LJ, Vesterinen EJ, Clare EL, et al.. Counting  
775 with DNA in metabarcoding studies: How should we convert sequence reads to dietary data?  
776 *Mol Ecol.* 2019; doi: 10.1111/mec.14734.

777 70. Elbrecht V, Peinert B, Leese F. Sorting things out: Assessing effects of unequal specimen  
778 biomass on DNA metabarcoding. *Ecol Evol.* 2017; doi: 10.1002/ece3.3192.

779 71. Creedy TJ, Ng WS, Vogler AP. Toward accurate species-level metabarcoding of arthropod  
780 communities from the tropical forest canopy. *Ecol Evol.* 2019; doi: 10.1002/ece3.4839.

781 72. Elbrecht V, Boursat S, Hörrn T, Lindner A, Mordente A, Noll N, et al.. Pooling size sorted  
782 malaise trap fractions to maximise taxon recovery with metabarcoding. *PeerJ.* 2021; doi:  
783 10.7717/peerj.12177.

784 73. Cardoso P, Leather SR. Predicting a global insect apocalypse. *Insect Conserv Divers.* 2019;  
785 doi: 10.1111/icad.12367.

786 74. Zinger L, Bonin A, Alsos IG, Bálint M, Bik H, Boyer F, et al.. DNA metabarcoding—Need  
787 for robust experimental designs to draw sound ecological conclusions. *Mol Ecol.* 2019; doi:  
788 10.1111/mec.15060.

789 75. Ärje J, Melvad C, Jeppesen MR, Madsen SA, Raitoharju J, Rasmussen MS, et al.. Automatic  
790 image-based identification and biomass estimation of invertebrates. *Methods Ecol Evol.* 2020;  
791 doi: 10.1111/2041-210X.13428.

792 76. Valan M, Makonyi K, Maki A, Vondráček D, Ronquist F. Automated taxonomic  
793 identification of insects with expert-level accuracy using effective feature transfer from  
794 convolutional networks. *Syst Biol.* 2019; doi: 10.1093/sysbio/syz014.

795 77. Valan M, Vondráček D, Ronquist F. Awakening a taxonomist's third eye: exploring the  
796 utility of computer vision and deep learning in insect systematics. *Syst Entomol.* 2021; doi:  
797 10.1111/syen.12492.

798 78. Ronquist F, Forshage M, Häggqvist S, Karlsson D, Hovmöller R, Bergsten J, et al..  
799 Completing Linnaeus's inventory of the Swedish insect fauna: Only 5,000 species left? *PLoS*  
800 *One.* 2020; doi: 10.1371/journal.pone.0228561.

801 79. deWaard JR, Ratnasingham S, Zakharov E V, Borisenko A V, Steinke D, Telfer AC, et al.. A  
802 reference library for the identification of Canadian invertebrates: 1.5 million DNA barcodes,  
803 voucher specimens, and genomic samples. *Sci Data.* 2019; doi: 10.1038/s41597-019-0320-2.

804 80. Andújar C, Creedy TJ, Arribas P, López H, Salces-Castellano A, Pérez-Delgado AJ, et al..  
805 Validated removal of nuclear pseudogenes and sequencing artefacts from mitochondrial  
806 metabarcode data. *Mol Ecol Resour.* 2021; doi: 10.1111/1755-0998.13337.

807 81. Creedy TJ, Norman H, Tang CQCQ, Qing Chin K, Andujar C, Arribas P, et al.. A  
808 validated workflow for rapid taxonomic assignment and monitoring of a national fauna of bees  
809 (Apiformes) using high throughput DNA barcoding. *Mol Ecol Resour.* doi: 10.1111/1755-  
810 0998.13056.

811 82. Nielsen M, Gilbert MTP, Pape T, Bohmann K. A simplified DNA extraction protocol for  
812 unsorted bulk arthropod samples that maintains exoskeletal integrity. *Environ DNA.* 2019; doi:  
813 10.1002/edn3.16.

814 83. Arribas P, Andújar C, Hopkins K, Shepherd M, Vogler AP, Andújar C, et al.. Metabarcoding  
815 and mitochondrial metagenomics of endogean arthropods to unveil the mesofauna of the soil.  
816 *Methods Ecol Evol.* 2016; doi: 10.1111/2041-210X.12557.

817 84. Deiner K, Walser JC, Mächler E, Altermatt F. Choice of capture and extraction methods  
818 affect detection of freshwater biodiversity from environmental DNA. *Biol Conserv.* Elsevier Ltd;  
819 2015; doi: 10.1016/j.biocon.2014.11.018.

820 85. Majaneva M, Diserud OH, Eagle SHC, Hajibabaei M, Ekrem T. Choice of DNA extraction  
821 method affects DNA metabarcoding of unsorted invertebrate bulk samples. *Metabarcoding and*  
822 *Metagenomics.* 2018; doi: 10.3897/mbmg.2.26664.

823 86. Sellers GS, Di Muri C, Gómez A, Hänfling B. Mu-DNA: A modular universal DNA  
824 extraction method adaptable for a wide range of sample types. *Metabarcoding and*  
825 *Metagenomics.* 2018; doi: 10.3897/mbmg.2.24556.

826 87. Zinger L, Lionnet C, Benoiston A-S, Donald J, Mercier C, Boyer F. metabar : an R package  
827 for the evaluation and improvement of DNA metabarcoding data quality. *Methods Ecol Evol.*  
828 2021; doi: 10.1111/2041-210X.13552.

829 88. Jarman SN, Berry O, Bunce M. The value of environmental DNA biobanking for long-term  
830 biomonitoring. *Nat Ecol Evol.* Springer US; 2018; doi: 10.1038/s41559-018-0614-3.

831 89. Andújar C, Arribas P, Yu DW, Vogler AP, Emerson BC. Why the COI barcode should be  
832 the community DNA metabarcode for the Metazoa. *Mol Ecol.* 2018; doi: 10.1111/mec.14844.

833 90. Beng KC, Tomlinson KW, Shen XH, Surget-Groba Y, Hughes AC, Corlett RT, et al.. The  
834 utility of DNA metabarcoding for studying the response of arthropod diversity and composition  
835 to land-use change in the tropics. *Sci Rep.* 2016; doi: 10.1038/srep24965.

836 91. Elbrecht V, Leese F, Nichols SJ. Validation and Development of COI Metabarcoding  
837 Primers for Freshwater Macroinvertebrate Bioassessment. *Front Environ Sci.* 2017; doi:  
838 10.3389/fenvs.2017.00011.

839 92. Leray M, Yang JY, Meyer CP, Mills SC, Agudelo N, Ranwez V, et al.. A new versatile  
840 primer set targeting a short fragment of the mitochondrial COI region for metabarcoding  
841 metazoan diversity: application for characterizing coral reef fish gut contents. *Front Zool.*

842 Frontiers in Zoology; 2013; doi: 10.1186/1742-9994-10-34.

843 93. Arribas P, Andújar C, Salces-Castellano A, Emerson BC, Vogler AP. The limited spatial  
844 scale of dispersal in soil arthropods revealed with whole-community haplotype-level  
845 metabarcoding. *Mol Ecol*. 2021; doi: <https://doi.org/10.1111/mec.15591>.

846 94. Yang C, Bohmann K, Wang X, Cai W, Wales N, Ding Z, et al.. Biodiversity Soup II: A bulk-  
847 sample metabarcoding pipeline emphasizing error reduction. *Methods Ecol Evol*. 2021; doi:  
848 10.1111/2041-210X.13602.

849 95. Haas BJ, Gevers D, Earl AM, Feldgarden M, Ward D V., Giannoukos G, et al.. Chimeric  
850 16S rRNA sequence formation and detection in Sanger and 454-pyrosequenced PCR amplicons.  
851 *Genome Res*. 2011; doi: 10.1101/gr.112730.110.

852 96. Elbrecht V, Vamos EE, Steinke D, Leese F. Estimating intraspecific genetic diversity from  
853 community DNA metabarcoding data. *PeerJ*. 2018; doi: 10.7717/peerj.4644.

854 97. Nichols R V., Vollmers C, Newsom LA, Wang Y, Heintzman PD, Leighton M, et al..  
855 Minimizing polymerase biases in metabarcoding. *Mol Ecol Resour*. 2018; doi: 10.1111/1755-  
856 0998.12895.

857 98. Sze MA, Schloss PD. The Impact of DNA Polymerase and Number of Rounds of  
858 Amplification in PCR on 16S rRNA Gene Sequence Data. *mSphere*. 2019; doi:  
859 10.1128/msphere.00163-19.

860 99. Ahn JH, Hong IP, Bok JI, Kim BY, Song J, Weon HY. Pyrosequencing analysis of the  
861 bacterial communities in the guts of honey bees *Apis cerana* and *Apis mellifera* in Korea. *J*  
862 *Microbiol*. 2012; doi: 10.1007/s12275-012-2188-0.

863 100. Gury J, Zinger L, Gielly L, Taberlet P, Geremia RA. Exonuclease activity of proofreading  
864 DNA polymerases is at the origin of artifacts in molecular profiling studies. *Electrophoresis*.  
865 2008; doi: 10.1002/elps.200700667.

866 101. Buchner D, Beermann AJ, Leese F, Weiss M. Cooking small and large portions of

867 “biodiversity- soup”: Miniaturized DNA metabarcoding PCRs perform as good as large-  
868 volume PCRs. *Ecol Evol.* 2021; doi: 10.1002/ece3.7753.

869 102. Ficetola GF, Pansu J, Bonin A, Coissac E, Giguet-Covex C, De Barba M, et al.. Replication  
870 levels, false presences and the estimation of the presence/absence from eDNA metabarcoding  
871 data. *Mol Ecol Resour.* 2015; doi: 10.1111/1755-0998.12338.

872 103. Dopheide A, Xie D, Buckley TR, Drummond AJ, Newcomb RD. Impacts of DNA  
873 extraction and PCR on DNA metabarcoding estimates of soil biodiversity. *Methods Ecol Evol.*  
874 2019; doi: 10.1111/2041-210X.13086.

875 104. Alberdi A, Aizpurua O, Gilbert MTP, Bohmann K. Scrutinizing key steps for reliable  
876 metabarcoding of environmental samples. *Methods Ecol Evol.* 2018; doi: 10.1111/2041-  
877 210X.12849.

878 105. Schnell IB, Bohmann K, Gilbert MTP. Tag jumps illuminated - reducing sequence-to-  
879 sample misidentifications in metabarcoding studies. *Mol Ecol Resour.* 2015; doi: 10.1111/1755-  
880 0998.12402.

881 106. Bohmann K, Elbrecht V, Carøe C, Bista I, Leese F, Bunce M, et al.. Strategies for sample  
882 labelling and library preparation in DNA metabarcoding studies. *Mol Ecol Resour.* 2021;

883 107. Bista I, Carvalho GR, Tang M, Walsh K, Zhou X, Hajibabaei M, et al.. Performance of  
884 amplicon and shotgun sequencing for accurate biomass estimation in invertebrate community  
885 samples. *Mol Ecol Resour.* 2018; doi: 10.1111/1755-0998.12888.

886 108. Esling P, Lejzerowicz F, Pawlowski J. Accurate multiplexing and filtering for high-  
887 throughput amplicon-sequencing. *Nucleic Acids Res.* 2015; doi: 10.1093/nar/gkv107.

888 109. Smets W, Leff JW, Bradford MA, McCulley RL, Lebeer S, Fierer N. A method for  
889 simultaneous measurement of soil bacterial abundances and community composition via 16S  
890 rRNA gene sequencing. *Soil Biol Biochem.* Elsevier Ltd; 2016; doi:  
891 10.1016/j.soilbio.2016.02.003.



892 110. Ushio M, Murakami H, Masuda R, Sado T, Miya M, Sakurai S, et al.. Quantitative  
893 monitoring of multispecies fish environmental DNA using high-throughput sequencing.  
894 *Metabarcoding and Metagenomics*. 2018; doi: 10.3897/mbmg.2.23297.

895 111. Elbrecht V, Leese F, Rockström J, Steffen W, Noone K, Persson A, et al.. Can DNA-Based  
896 Ecosystem Assessments Quantify Species Abundance? Testing Primer Bias and Biomass—  
897 Sequence Relationships with an Innovative Metabarcoding Protocol. *PLoS One*. 2015; doi:  
898 10.1371/journal.pone.0130324.

899 112. Carøe C, Bohmann K. Tagsteady: A metabarcoding library preparation protocol to avoid  
900 false assignment of sequences to samples. *Mol Ecol Resour*. 2020; doi: 10.1111/1755-  
901 0998.13227.

902 113. Singer GAC, Fahner NA, Barnes JG, McCarthy A, Hajibabaei M. Comprehensive  
903 biodiversity analysis via ultra-deep patterned flow cell technology: a case study of eDNA  
904 metabarcoding seawater. *Sci Rep*. 2019; doi: 10.1038/s41598-019-42455-9.

905 114. Tedersoo L, Ramirez KS, Nilsson RH, Kaljuvee A, Kõljalg U, Abarenkov K. Standardizing  
906 metadata and taxonomic identification in metabarcoding studies. *Gigascience*. 2015; doi:  
907 10.1186/s13742-015-0074-5.

908 115. Wieczorek J, Bloom D, Guralnick R, Blum S, Döring M, Giovanni R, et al.. Darwin core:  
909 An evolving community-developed biodiversity data standard. *PLoS One*. 2012; doi:  
910 10.1371/journal.pone.0029715.

911 116. Yilmaz P, Kottmann R, Field D, Knight R, Cole JR, Amaral-Zettler L, et al.. Minimum  
912 information about a marker gene sequence (MIMARKS) and minimum information about any  
913 (x) sequence (MIxS) specifications. *Nat Biotechnol*. 2011; doi: 10.1038/nbt.1823.

914

# MODULE 1

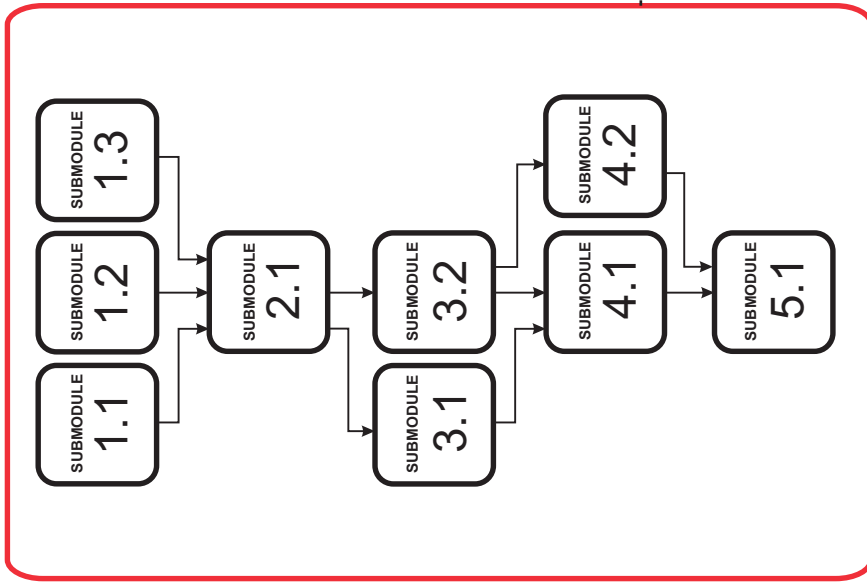

1 Sample acquisition

2 Sample processing

3 DNA extraction

4 Amplification, library preparation and sequencing

5 DNA sequence and metadata deposition

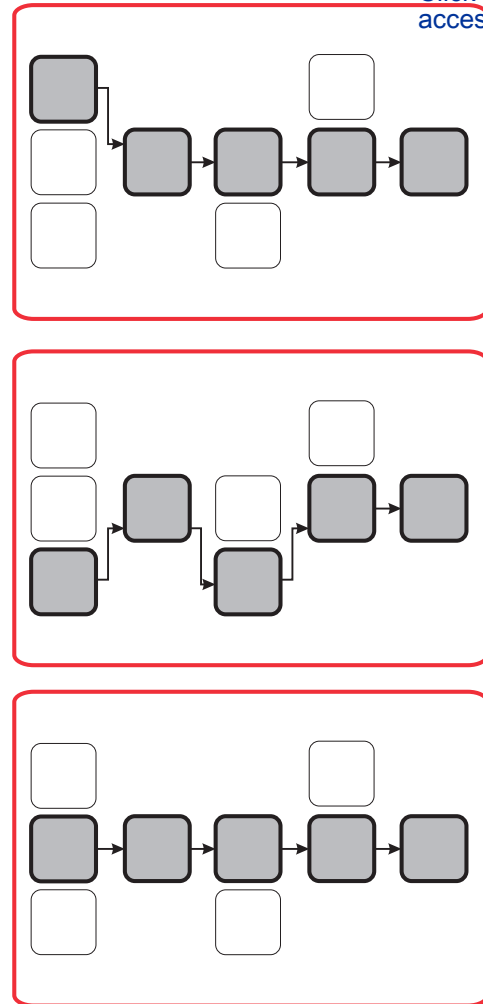

potential DATA GENERATION PIPELINES
