# Supplementary material for: Toward global integration of biodiversity big data: a harmonized metabarcode data generation module for terrestrial arthropods
Source: PubMed Central journal article supplement (PMC9295367; doi:10.1093/gigascience/giac065), 2022-07-19
Supplement: giac065_giga-d-21-00420_revision_1.pdf [file giac065_giga-d-21-00420_revision_1.pdf]

## Toward global integration of biodiversity big data: a harmonised metabarcode data generation module for terrestrial arthropods

--Manuscript Draft--

|                                                      |                                                                                                                                                                                                                                                                                                                                                                                                                                                                                                                                                                                                                                                                                                                                                                                                                                                                                                                                                                                                                                                                                                                                                                                                                                                                                                                                                                                                                                                                                                                                                                                                                                                                                                                                                                                                                                                                                                                                                                                             |                      |
|------------------------------------------------------|---------------------------------------------------------------------------------------------------------------------------------------------------------------------------------------------------------------------------------------------------------------------------------------------------------------------------------------------------------------------------------------------------------------------------------------------------------------------------------------------------------------------------------------------------------------------------------------------------------------------------------------------------------------------------------------------------------------------------------------------------------------------------------------------------------------------------------------------------------------------------------------------------------------------------------------------------------------------------------------------------------------------------------------------------------------------------------------------------------------------------------------------------------------------------------------------------------------------------------------------------------------------------------------------------------------------------------------------------------------------------------------------------------------------------------------------------------------------------------------------------------------------------------------------------------------------------------------------------------------------------------------------------------------------------------------------------------------------------------------------------------------------------------------------------------------------------------------------------------------------------------------------------------------------------------------------------------------------------------------------|----------------------|
| <b>Manuscript Number:</b>                            | GIGA-D-21-00420R1                                                                                                                                                                                                                                                                                                                                                                                                                                                                                                                                                                                                                                                                                                                                                                                                                                                                                                                                                                                                                                                                                                                                                                                                                                                                                                                                                                                                                                                                                                                                                                                                                                                                                                                                                                                                                                                                                                                                                                           |                      |
| <b>Full Title:</b>                                   | Toward global integration of biodiversity big data: a harmonised metabarcode data generation module for terrestrial arthropods                                                                                                                                                                                                                                                                                                                                                                                                                                                                                                                                                                                                                                                                                                                                                                                                                                                                                                                                                                                                                                                                                                                                                                                                                                                                                                                                                                                                                                                                                                                                                                                                                                                                                                                                                                                                                                                              |                      |
| <b>Article Type:</b>                                 | Review                                                                                                                                                                                                                                                                                                                                                                                                                                                                                                                                                                                                                                                                                                                                                                                                                                                                                                                                                                                                                                                                                                                                                                                                                                                                                                                                                                                                                                                                                                                                                                                                                                                                                                                                                                                                                                                                                                                                                                                      |                      |
| <b>Funding Information:</b>                          | Horizon 2020<br>(810729)                                                                                                                                                                                                                                                                                                                                                                                                                                                                                                                                                                                                                                                                                                                                                                                                                                                                                                                                                                                                                                                                                                                                                                                                                                                                                                                                                                                                                                                                                                                                                                                                                                                                                                                                                                                                                                                                                                                                                                    | Dr Anna Papadopoulou |
|                                                      | "la Caixa" Foundation<br>(LCF/BQ/PR21/11840006)                                                                                                                                                                                                                                                                                                                                                                                                                                                                                                                                                                                                                                                                                                                                                                                                                                                                                                                                                                                                                                                                                                                                                                                                                                                                                                                                                                                                                                                                                                                                                                                                                                                                                                                                                                                                                                                                                                                                             | Dr Paula Arribas     |
| <b>Abstract:</b>                                     | <p>Metazoan metabarcoding is emerging as an essential strategy for inventorying biodiversity, with diverse projects currently generating massive quantities of community-level data. The potential for integrating across such datasets offers new opportunities to better understand biodiversity and how it might respond to global change. However, large-scale syntheses may be compromised if metabarcoding workflows differ from each other. There are ongoing efforts to improve standardisation for the reporting of inventory data. However, harmonisation at the stage of generating metabarcode data has yet to be addressed. A modular framework for harmonised data generation offers a pathway to navigate the complex structure of terrestrial metazoan biodiversity. Here, through our collective expertise as practitioners, method developers and researchers leading metabarcoding initiatives to inventory terrestrial biodiversity, we seek to initiate a harmonised framework for metabarcode data generation, with a terrestrial arthropod module. We develop an initial set of submodules covering the five main steps of metabarcode data generation: (i) sample acquisition, (ii) sample processing, (iii) DNA extraction, (iv) PCR amplification, library preparation and sequencing, and (v) DNA sequence and metadata deposition, providing a backbone for a terrestrial arthropod module. To achieve this, we (i) identified key points for harmonisation; (ii) reviewed the current state of the art; and (iii) distilled existing knowledge within submodules, thus promoting best practice by providing guidelines and recommendations to reduce the universe of methodological options. We advocate the adoption and further development of the terrestrial arthropod module. We further encourage the development of modules for other biodiversity fractions, as an essential step toward large-scale biodiversity synthesis through harmonization.</p> |                      |
| <b>Corresponding Author:</b>                         | Paula Arribas<br>Instituto de Productos Naturales y Agrobiología<br>San Cristobal de la Laguna, Canarias SPAIN                                                                                                                                                                                                                                                                                                                                                                                                                                                                                                                                                                                                                                                                                                                                                                                                                                                                                                                                                                                                                                                                                                                                                                                                                                                                                                                                                                                                                                                                                                                                                                                                                                                                                                                                                                                                                                                                              |                      |
| <b>Corresponding Author Secondary Information:</b>   |                                                                                                                                                                                                                                                                                                                                                                                                                                                                                                                                                                                                                                                                                                                                                                                                                                                                                                                                                                                                                                                                                                                                                                                                                                                                                                                                                                                                                                                                                                                                                                                                                                                                                                                                                                                                                                                                                                                                                                                             |                      |
| <b>Corresponding Author's Institution:</b>           | Instituto de Productos Naturales y Agrobiología                                                                                                                                                                                                                                                                                                                                                                                                                                                                                                                                                                                                                                                                                                                                                                                                                                                                                                                                                                                                                                                                                                                                                                                                                                                                                                                                                                                                                                                                                                                                                                                                                                                                                                                                                                                                                                                                                                                                             |                      |
| <b>Corresponding Author's Secondary Institution:</b> |                                                                                                                                                                                                                                                                                                                                                                                                                                                                                                                                                                                                                                                                                                                                                                                                                                                                                                                                                                                                                                                                                                                                                                                                                                                                                                                                                                                                                                                                                                                                                                                                                                                                                                                                                                                                                                                                                                                                                                                             |                      |
| <b>First Author:</b>                                 | Paula Arribas                                                                                                                                                                                                                                                                                                                                                                                                                                                                                                                                                                                                                                                                                                                                                                                                                                                                                                                                                                                                                                                                                                                                                                                                                                                                                                                                                                                                                                                                                                                                                                                                                                                                                                                                                                                                                                                                                                                                                                               |                      |
| <b>First Author Secondary Information:</b>           |                                                                                                                                                                                                                                                                                                                                                                                                                                                                                                                                                                                                                                                                                                                                                                                                                                                                                                                                                                                                                                                                                                                                                                                                                                                                                                                                                                                                                                                                                                                                                                                                                                                                                                                                                                                                                                                                                                                                                                                             |                      |
| <b>Order of Authors:</b>                             | Paula Arribas                                                                                                                                                                                                                                                                                                                                                                                                                                                                                                                                                                                                                                                                                                                                                                                                                                                                                                                                                                                                                                                                                                                                                                                                                                                                                                                                                                                                                                                                                                                                                                                                                                                                                                                                                                                                                                                                                                                                                                               |                      |
|                                                      | Carmelo Andújar                                                                                                                                                                                                                                                                                                                                                                                                                                                                                                                                                                                                                                                                                                                                                                                                                                                                                                                                                                                                                                                                                                                                                                                                                                                                                                                                                                                                                                                                                                                                                                                                                                                                                                                                                                                                                                                                                                                                                                             |                      |
|                                                      | Kristine Bohmann                                                                                                                                                                                                                                                                                                                                                                                                                                                                                                                                                                                                                                                                                                                                                                                                                                                                                                                                                                                                                                                                                                                                                                                                                                                                                                                                                                                                                                                                                                                                                                                                                                                                                                                                                                                                                                                                                                                                                                            |                      |
|                                                      | Jeremy R deWaard                                                                                                                                                                                                                                                                                                                                                                                                                                                                                                                                                                                                                                                                                                                                                                                                                                                                                                                                                                                                                                                                                                                                                                                                                                                                                                                                                                                                                                                                                                                                                                                                                                                                                                                                                                                                                                                                                                                                                                            |                      |
|                                                      | Evan P Economo                                                                                                                                                                                                                                                                                                                                                                                                                                                                                                                                                                                                                                                                                                                                                                                                                                                                                                                                                                                                                                                                                                                                                                                                                                                                                                                                                                                                                                                                                                                                                                                                                                                                                                                                                                                                                                                                                                                                                                              |                      |
|                                                      | Vasco Elbrecht                                                                                                                                                                                                                                                                                                                                                                                                                                                                                                                                                                                                                                                                                                                                                                                                                                                                                                                                                                                                                                                                                                                                                                                                                                                                                                                                                                                                                                                                                                                                                                                                                                                                                                                                                                                                                                                                                                                                                                              |                      |
|                                                      |                                                                                                                                                                                                                                                                                                                                                                                                                                                                                                                                                                                                                                                                                                                                                                                                                                                                                                                                                                                                                                                                                                                                                                                                                                                                                                                                                                                                                                                                                                                                                                                                                                                                                                                                                                                                                                                                                                                                                                                             |                      |

|                                                |                                                                                                                                                                                                                                                                                                                                                                                                                                                                                                                                                                                                                                                                                                                                                                                                                                                                                                                                                                                                                                                                                                                                                                                                                                                                                                                                                                                                                                                                                                                                                                                                                                                                                                                                                                                                                                                                                                                                                                                                                                                                                                                                                                                                                                                                                                                                                                                                                                            |
|------------------------------------------------|--------------------------------------------------------------------------------------------------------------------------------------------------------------------------------------------------------------------------------------------------------------------------------------------------------------------------------------------------------------------------------------------------------------------------------------------------------------------------------------------------------------------------------------------------------------------------------------------------------------------------------------------------------------------------------------------------------------------------------------------------------------------------------------------------------------------------------------------------------------------------------------------------------------------------------------------------------------------------------------------------------------------------------------------------------------------------------------------------------------------------------------------------------------------------------------------------------------------------------------------------------------------------------------------------------------------------------------------------------------------------------------------------------------------------------------------------------------------------------------------------------------------------------------------------------------------------------------------------------------------------------------------------------------------------------------------------------------------------------------------------------------------------------------------------------------------------------------------------------------------------------------------------------------------------------------------------------------------------------------------------------------------------------------------------------------------------------------------------------------------------------------------------------------------------------------------------------------------------------------------------------------------------------------------------------------------------------------------------------------------------------------------------------------------------------------------|
|                                                | Stefan Geisen                                                                                                                                                                                                                                                                                                                                                                                                                                                                                                                                                                                                                                                                                                                                                                                                                                                                                                                                                                                                                                                                                                                                                                                                                                                                                                                                                                                                                                                                                                                                                                                                                                                                                                                                                                                                                                                                                                                                                                                                                                                                                                                                                                                                                                                                                                                                                                                                                              |
|                                                | Marta Goberna                                                                                                                                                                                                                                                                                                                                                                                                                                                                                                                                                                                                                                                                                                                                                                                                                                                                                                                                                                                                                                                                                                                                                                                                                                                                                                                                                                                                                                                                                                                                                                                                                                                                                                                                                                                                                                                                                                                                                                                                                                                                                                                                                                                                                                                                                                                                                                                                                              |
|                                                | Henrik Krehenwinkel                                                                                                                                                                                                                                                                                                                                                                                                                                                                                                                                                                                                                                                                                                                                                                                                                                                                                                                                                                                                                                                                                                                                                                                                                                                                                                                                                                                                                                                                                                                                                                                                                                                                                                                                                                                                                                                                                                                                                                                                                                                                                                                                                                                                                                                                                                                                                                                                                        |
|                                                | Vojtech Novotny                                                                                                                                                                                                                                                                                                                                                                                                                                                                                                                                                                                                                                                                                                                                                                                                                                                                                                                                                                                                                                                                                                                                                                                                                                                                                                                                                                                                                                                                                                                                                                                                                                                                                                                                                                                                                                                                                                                                                                                                                                                                                                                                                                                                                                                                                                                                                                                                                            |
|                                                | Lucie Zinger                                                                                                                                                                                                                                                                                                                                                                                                                                                                                                                                                                                                                                                                                                                                                                                                                                                                                                                                                                                                                                                                                                                                                                                                                                                                                                                                                                                                                                                                                                                                                                                                                                                                                                                                                                                                                                                                                                                                                                                                                                                                                                                                                                                                                                                                                                                                                                                                                               |
|                                                | Thomas J Creedy                                                                                                                                                                                                                                                                                                                                                                                                                                                                                                                                                                                                                                                                                                                                                                                                                                                                                                                                                                                                                                                                                                                                                                                                                                                                                                                                                                                                                                                                                                                                                                                                                                                                                                                                                                                                                                                                                                                                                                                                                                                                                                                                                                                                                                                                                                                                                                                                                            |
|                                                | Emmanouil Meramveliotakis                                                                                                                                                                                                                                                                                                                                                                                                                                                                                                                                                                                                                                                                                                                                                                                                                                                                                                                                                                                                                                                                                                                                                                                                                                                                                                                                                                                                                                                                                                                                                                                                                                                                                                                                                                                                                                                                                                                                                                                                                                                                                                                                                                                                                                                                                                                                                                                                                  |
|                                                | Víctor Noguerales                                                                                                                                                                                                                                                                                                                                                                                                                                                                                                                                                                                                                                                                                                                                                                                                                                                                                                                                                                                                                                                                                                                                                                                                                                                                                                                                                                                                                                                                                                                                                                                                                                                                                                                                                                                                                                                                                                                                                                                                                                                                                                                                                                                                                                                                                                                                                                                                                          |
|                                                | Isaac Overcast                                                                                                                                                                                                                                                                                                                                                                                                                                                                                                                                                                                                                                                                                                                                                                                                                                                                                                                                                                                                                                                                                                                                                                                                                                                                                                                                                                                                                                                                                                                                                                                                                                                                                                                                                                                                                                                                                                                                                                                                                                                                                                                                                                                                                                                                                                                                                                                                                             |
|                                                | Hélène Morlon                                                                                                                                                                                                                                                                                                                                                                                                                                                                                                                                                                                                                                                                                                                                                                                                                                                                                                                                                                                                                                                                                                                                                                                                                                                                                                                                                                                                                                                                                                                                                                                                                                                                                                                                                                                                                                                                                                                                                                                                                                                                                                                                                                                                                                                                                                                                                                                                                              |
|                                                | Anna Papadopoulou                                                                                                                                                                                                                                                                                                                                                                                                                                                                                                                                                                                                                                                                                                                                                                                                                                                                                                                                                                                                                                                                                                                                                                                                                                                                                                                                                                                                                                                                                                                                                                                                                                                                                                                                                                                                                                                                                                                                                                                                                                                                                                                                                                                                                                                                                                                                                                                                                          |
|                                                | Alfried P Vogler                                                                                                                                                                                                                                                                                                                                                                                                                                                                                                                                                                                                                                                                                                                                                                                                                                                                                                                                                                                                                                                                                                                                                                                                                                                                                                                                                                                                                                                                                                                                                                                                                                                                                                                                                                                                                                                                                                                                                                                                                                                                                                                                                                                                                                                                                                                                                                                                                           |
|                                                | Brent C Emerson                                                                                                                                                                                                                                                                                                                                                                                                                                                                                                                                                                                                                                                                                                                                                                                                                                                                                                                                                                                                                                                                                                                                                                                                                                                                                                                                                                                                                                                                                                                                                                                                                                                                                                                                                                                                                                                                                                                                                                                                                                                                                                                                                                                                                                                                                                                                                                                                                            |
| <b>Order of Authors Secondary Information:</b> |                                                                                                                                                                                                                                                                                                                                                                                                                                                                                                                                                                                                                                                                                                                                                                                                                                                                                                                                                                                                                                                                                                                                                                                                                                                                                                                                                                                                                                                                                                                                                                                                                                                                                                                                                                                                                                                                                                                                                                                                                                                                                                                                                                                                                                                                                                                                                                                                                                            |
| <b>Response to Reviewers:</b>                  | <p>Dear Editor,</p> <p>Many thanks for your comments with respect to our manuscript entitled "Toward global integration of biodiversity big data: a harmonised metabarcode data generation module for terrestrial arthropods". We are pleased that the editor and reviewers viewed the work timely and of general interest to the broad scientific audience of GigaScience. We found the comments helpful and interesting and have carefully read through and acted on all reviewer suggestions (all changes highlighted in the newly submitted version), and explain our responses, point-by-point, in this letter (text in blue preceded by ' &gt;&gt; '). Many thanks for your time,</p> <p>We look forward to hearing from you.</p> <p>Yours sincerely,<br/> Paula Arribas &amp; Brent C. Emerson (on behalf of co-authors)</p> <p>-----</p> <p>Editor comments:</p> <p>Dear Dr Arribas,</p> <p>Your manuscript "Toward global integration of biodiversity big data: a harmonised metabarcode data generation module for terrestrial arthropods" (Review Article, GIGA-D-21-00420) has been assessed by our reviewers. Based on these reports, and my own assessment as Editor, I am pleased to inform you that it is potentially acceptable for publication in GigaScience, once you have carried out some essential revisions suggested by our reviewers. Their reports are below. Please note, reviewer #2 requested a document with line numbers during review, and I added those to your word document and re-uploaded it to Editorial Manager - please download the version with line numbers from EM to see which lines the reviewer refers to.</p> <p>&gt;&gt; Thank you very much for the overall positive evaluation of our manuscript. We have revised the text to incorporate the suggestions of the reviewers. We are very grateful for the time that they have dedicated to reviewing our work, and their suggestions have improved clarity and provide for a more polished manuscript. Please see below for details.</p> <p>Reviewer reports:</p> <p>Reviewer #1: Comments to Authors (please, see pdf for a better format).</p> <p>I found the manuscript "Toward global integration of biodiversity big data: a harmonised metabarcode data generation module for terrestrial arthropods" very interesting and useful.</p> <p>I think that a review of the current metabarcoding methods and techniques is timely</p> |

and the provided structure in modules seems to work well, adding a lot of value to the work. The suggested module framework can be very valuable, especially considering it leaves options for customization.

I personally think that the literature review is quite complete, and the information reported give the reader a good picture of the topic.

>> Thank you for your positive evaluation, and for the time you have dedicated improving the clarity of our manuscript, we appreciate it.

I have a few suggestions that I hope may help making the paper even clearer and more useful to the reader. For example, I think the structure of the paper should match the structure of the figure, with a clear subdivision in modules and submodules (i.e., chapters and subchapters). While it surely is not the ideal behaviour, we are all aware that many readers will probably skim through the article to the different modules they are interested on. A more defined chapter structure of the article will make it more useful to a wider audience.

>> We think that the limited way we integrated between the figure and text may have created some confusion, and thus we have clarified this aspect in the new version. Please see below the details in the specific comment.

The writing is clear, and the article is well-written. I hope the authors will forgive me if I spent a bit of time making (probably picky) changes to the wording, especially in the conclusion. This is only because I think the paper really has value and the conclusion will be one of the most-read parts of the article once published.

>> We don't think this is picky at all, and appreciate the time you have invested in our work. All the suggestions have been incorporated into the new version.

I have a few main comments and some minor changes (below), but I think the article should be accepted after their corrections.

Please, add continuous line numbers when resubmitting.

>> Done.

Main comments:

Module 1: Sample acquisition.

-At page 7, the authors start with the "Sample acquisition" chapter, which is their "Module 1" in the figure. The title of this chapter should be "Module 1: Sample acquisition". Here the reader, after a first introductory paragraph where a sample is defined (see next comment), should be able to find three subsections: submodule 1.1: malaise traps, submodule 1.2: pitfall traps. This proposed structure could also help readers focus on the part they are interested in. For example, if a researcher is using only pitfall traps, they will go directly to submodule 1.2. What about submodule 1.3? It appears in the figure but not in the text. If the figure is just an example of submodules that can be added, the authors should state that.

>> Thank you for pointing out this potential source of confusion. Please note that the section "Sample acquisition" does not correspond with Module 1 in Figure 1. We have clarified in the text and figure legend that Figure 1 is a schematic representation of the modular structure proposed for building a harmonised framework for the generation of metabarcode data for different fractions of terrestrial animals (modified text, lines 136). Our manuscript proposes this framework, and develops one such module: the terrestrial arthropods module, which focused on harmonisation for this biodiversity fraction.

The rationale for the structure of the terrestrial arthropod module text is that, once the justification of the general need for this module is developed in the text, we (i) review the existing literature pertaining to the five main steps (as subsections) and based on that, (ii) propose one or several submodules per step, providing a summary table for each submodule. We have reworded the text and headings (e.g. modified text, lines 136, 149, 186) to clarify this. We agree with the reviewer that many readers will probably skim through the article to the different submodules they are interested in, so thus we provide a summary table for each proposed submodule. So, for the first step (1. Sample acquisition step) of the terrestrial arthropod module we propose the 1.1 Malaise trapping sample acquisition submodule (Table 1) and the 1.2 Pitfall trapping sample acquisition submodule (Table 2). Additional submodules can be further developed within this module (e.g. 1.3, 1.4...).

-This module start saying that it's important to have a "sample definition", and I totally agree. However, the authors do not provide one. It is true that a sample definition is strongly linked to the collection technique, but I think that we still require a sample definition, and I think the authors should be able to provide one. In my opinion, all the information necessary for a definition is in the text, it just need to be summarised. For example, a sample is composed by the arthropods, but also by their preservation, and

the associated metadata. If any of these factors is missing, the sample is not fit for metabarcoding. It would be useful to know what else is really required for a sample to be defined as such. This sample definition should be after the first sentence and prior to the second one.

>> Please see the previous comment, and note that information regarding the sample definition for each submodule is summarized in the corresponding table for each (i.e. Table 1 for the 1.1 Malaise trapping sample acquisition submodule and Table 2 for the 1.2 Pitfall trapping sample acquisition submodule).

-After the first introductory aspects on definition of a sample, the authors cite the work of Montgomery and colleagues, where seven different collection methods are listed. The authors state that these methods provide "an appropriate platform from which to develop sample acquisition submodules". After reading this, I would have expected the authors to provide a submodule on EACH of these seven methods. Instead, only malaise traps and pitfall traps are presented. By doing this, the authors are either contradicting themselves and the work of Montgomery, or they are not clear on the reason they decide to report only two methods. Are the authors suggesting that, of the seven sampling techniques proposed, only malaise traps and pitfall traps are good for metabarcoding? Or are you suggesting that these two alone can provide good-enough results? Or again that, while all seven techniques are good, the authors are explaining only two? (If so, why?). In any case, this should be explained in detail.

>> We do not suggest that only malaise traps and pitfall traps are good for metabarcoding, rather we suggest that these two provide a useful minimum set for providing broad representation. We are perhaps not clear enough on this in our original text, and we have now sought to be clearer on this point (new text, lines 261). We discuss that the seven arthropod sampling methods proposed by the review of Montgomery et al. 2021 are a solid basis to develop submodules within the Sample Acquisition step of the terrestrial arthropod module. We then review existing arthropod metabarcoding literature, and identify malaise traps as the most relevant in terms of its (i) dominant use compared to the other sampling methods, and (i) lack of harmonisation. We then identify pitfall trapping as complementary to malaise trapping because it is directed to less dispersive ground active species (modified text, lines 260). Please note that we also further encourage the development of additional submodules within the terrestrial arthropod module (new text, lines 566). However, we consider malaise and pitfall trapping to be an appropriate minimum set.

-In addition to this, I would separate the sampling techniques from the metadata collection, or it could get very repetitive. In fact, independently of the collection method, the metadata information should always accompany the arthropods sample. For example, why in table 1.2 is not reported "Extreme weather events during trapping"? This is very important for pitfall traps, too. Indeed, a major rainfall could dilute the preservative or even make the trap overflow (with relative risk of losing specimens). While a very hot weather is known to cause evaporation, with the risk of drying the trap. The authors mention this in the text, but not in the table.

>> We agree with the reviewer that Sampling Event metadata can be repetitive across sample acquisition submodules. However, we feel strongly that it is so should be considered as an essential part of sample acquisition, and so we prefer to maintain it in each sample acquisition submodule. We agree with the reviewer the 'Extreme weather events during trapping' metadata is a key point also for submodule 1.2 and have incorporated the info in the corresponding Table 2.

-In the same table, since it is reported the solution % for ethanol, also the glycol solution % should be reported. When using glycol in pitfall traps, the percentage should be lower than 95% (ideally between 40%/80% due to the viscosity of this preservative). At a 95% concentration, glycol may be so viscous that insect are not entirely submerged when they fall in the trap.

>> We have clarified the concentration of the propylene glycol in Table 2.

Module 2: Sample processing.

-As for the previous module, submodule paragraphs would be very helpful.

>> Please see our previous comment on this.

-I think the authors make an interesting point on the fact that size-sorting is not as necessary as one would think when deeper sequencing depth is an option. However, I have some issues with the explanations for this statement. The authors state that "increasing sequencing depth by 3-4 fold" to a "sufficient sequencing depth", together with "reasonable size ranges" make size-sorting superfluous. All these terms, unfortunately, are extremely subjective and do not enable the reader to understand when a sufficient sequencing depth is reached. Telling the reader that they need a

"sufficient sequencing depth" to be able to ignore size-sorting is a tautology: it is obvious that if the sequencing depth is sufficient your work is good. In my opinion, the question readers would ask themselves is: what is a good sequencing depth in order for me to avoid size-sorting as the authors suggest? It is mentioned an increase of 3-4 fold, but that is relative to the whatever number of reads you had to start with. It would probably be useful for the reader to understand what platform the authors are referring to at this stage, but that would also require the authors to explain how many samples they would process per run. Depending on the work conducted, an increase of 3-4 folds in sequencing depth may mean the operator has to move from a MiSeq to a NovaSeq, for example. Or reduce the number of samples processed on each run (or their replicates). These factors should be considered, or at least mentioned, when suggesting that a higher sequencing depth is better than size-sorting. If the reader makes it to the end of the modules, they will notice this topic is mentioned at page 21. I think, however, that the correlation between sample processing and sequencing depth is extremely important and should be explained in this module.

>> The reviewer makes a good point, and we think the simplest way to deal with it is to remove the explicit mention of 3-4 fold. Indeed, 3-4 fold is specifically relevant to the reference being cited. We agree with the reviewer that the increase in sequencing depth will depend on project specific parameters, and thus there is no magic number. We thus make the general point that increased sequencing depth is an alternative to size sorting (modified text, lines 311). We also have reworded the text to direct the reader to the discussion of step 4 (Amplification, library preparation and sequencing step section) on the sequencing depth (new text, lines 315).

I agree that size-sorting is terribly time-consuming and therefore expensive; however, having to run your samples on two runs instead of one to get a better sequencing depth would be probably more expensive. I am not sure if it can be useful to the authors, but Piper and colleagues (GigaScience, 8, 2019, 1-22, doi: 10.1093/gigascience/giz092, which is cited as reference number 7) provide a table with the costs and Gb output for each platform. This may be useful to give a reader an idea of what a good sequencing depth can be. Or link the readers to the page 21 explanation of the average reads-per-specimen expected in each sample. Otherwise, a possibly simpler solution could be to provide the reader with a method to determine what a good sequencing depth looks like. For example, a taxa recovery graph that reaches plateau has been considered a valid and easy test to determine this (Hajibabaei et al. 2019 - PLoS One. 2019; 14(9): e0220953. doi: 10.1371/journal.pone.0220953).

>> Thank you for these relevant references. We have included them in the corresponding section (new text, lines 505).

Minor changes:

Page 5, line 4: remove "are". It should read: "by placing different fractions of terrestrial diversity at the core of each "module".

>> Done.

Page 6, first 8 lines of the "Harmonisation for the metabarcoding of terrestrial arthropods" paragraph: Compared to the rest of the introduction, this paragraph could be improved both in form and in content. It seems a few different topics have just been put together, with an isolated sentence for each, without going in depth enough and without linking the sentences to each other. I suggest the authors either rewrite this paragraph or simply list the reasons why arthropods assessment is useful (e.g., biodiversity assessment, conservation of declining species, monitoring of invasives). As per the form, the use of terms such as "overwhelming" and "tremendous" could be avoided (a bit too subjective), as it should be the repetition of the word "present" at line 2.

>> We have reworded this paragraph according to reviewer suggestions (modified text, lines 151).

Page 6, last line: remove "in". It should read: "comparable to standard methods of arthropod monitoring".

>> Done.

Page 7, line 5: Close parenthesis after the references and remove the comma.

>> Done.

Page 7, first line of "Sample acquisition": "Starting point" instead of "departure point".

>> Done.

Page 15, "DNA extraction" Chapter, line 10: The authors mention the "taxonomic content of samples" and in bracket give the definition of OTUs. This can be confusing for the reader. The taxonomic content of a sample is not necessarily defined by OTUs,

but could be extrapolated using ASVs (amplicon sequence variants). Since the authors are referring to a specific paper they are referencing, I suggest to change the sentence to: "When assessing the recovered taxonomic content of samples using operational taxonomic units (OTUs), intact samples performed at least comparable.

>> Changed.

Page 16: The authors suggest that 100-200 µl of DNA extraction buffer can be considered appropriate for harmonisation. This gives the impression the authors are suggesting to use only 200 units of buffer when performing the DNA extraction. In my experience, an average pitfall trap that has been in the field for a week and contains even just 2 bees and 2 beetles (very unlikely) can easily require almost 1 ml of buffer when using a non-destructive DNA extraction method. As the authors stated a few sentences earlier, this is a large volume of buffer. Then why suggesting that 100-200 µl is enough? Was this referring to the use of just 100-200 µl as a subsample to purify from the overall volume used? If so, the sentence should read something like:

"Given this consideration, typical commercial kit extraction volumes of 100-200 µl can be considered an appropriate sub-sampling volume for subsequent purification."

>> Yes, that was our point. Changed (modified text, lines 387).

Page 17, Chapter 4: gene names should be italicised. Correct to: "Cytochrome c oxidase subunit I barcode region". Please, note that "subunit I" is not part of the name and should not be italicised.

>> Done.

Page 18, Line 3: I would break the sentence in two: "The BF3 fragment (418 bp) provides better taxonomic resolution than other overlapping fragments. Furthermore, primers within this region are also unaffected by slippage, and provide maximum overlap across already published studies."

>> Done.

Page 18, Line 18: Reference is missing, check "ref".

>> Included.

Page 18, Line 20: My understanding is that the proofreading activity of a polymerase is the 3'→5' exonuclease activity. I am not sure what the "non" refers to. I think it should read: "their proofreading activity (3'→5' exonuclease activity)"

>> Corrected.

Page 23, "Conclusion" Line 1: No need to give both the full name and the abbreviation for wocDNA, since this was done previously. The authors can pick one.

>> Done.

Page 23, "Conclusion" Line 7: "address this issue".

>> Done.

Page 23, "Conclusion" Line 8 and 11: the use of the term "canalization", while technically correct, seems a bit odd and adds unnecessary jargon, especially considering the conclusion will be read by most readers. I would suggest changing this term.

>> Changed.

Page 23, "Conclusion" Line 13 and 14: "submodule", "modular" and "modules" in the same sentence makes it very hard to read. A possible solution could be:

"the flexible structure we presented here seeks to broaden the applicability of a modular framework within the wocDNA metabarcoding community."

>> Replaced.

Page 23, "Conclusion" Line 18: Again, it is a bit repetitive to mention the submodule structure of the module. If it is a submodule, then it is already given that is part of the module. I would rephrase by removing "module".

>> Removed.

Reviewer #2:

The manuscript makes a well-argued case for the adoption of consistent metabarcoding data generation workflows (harmonisation) for inventorying macro-biodiversity, within a modular framework, to enable larger-scale analyses that incorporate multiple datasets - and this is clearly a good idea. To do this, the authors review the relevant literature, and based on this, provide sets of workflow recommendations, at five key data generation steps, within a proposed terrestrial arthropod metabarcoding module.

The paper is largely well written and easy to follow (apart from some parts detailed in the line-by-line comments below). The authors have done an excellent job of reviewing

the relevant literature, and the manuscript is packed with useful workflow recommendations for metabarcoding of terrestrial invertebrates. A particularly helpful aspect is the consideration of all data generation steps, from initial sampling through to the storage of sequence data and metadata.

One possible omission is that almost no mention is made of arthropods living below ground, which is an important component of terrestrial arthropod biodiversity, with another set of sampling methods and considerations. Given that the manuscript focuses on workflows for "terrestrial arthropods", I think it should at least be mentioned that that sampling for soil arthropod metabarcoding would be another submodule, but is not considered in this manuscript. Similarly, it might be helpful to suggest other modules that could or should be developed, within the conclusion?

>> Thank you for your assessment, and for the general point you raise in your last paragraph. We fully agree on the importance of considering soil arthropods. In this manuscript, we reviewed the literature and focused on developing two submodules that we find to have more immediate relevance, in terms of their already popular implementation (i.e. malaise traps), complementarity (i.e. pitfall trapping) and lack of harmonisation. Soil arthropods are an obvious candidate for further submodule development. We agree that it is worth suggesting different submodules within the conclusions that could or should be developed within the terrestrial arthropod module, and we explicitly mention soil arthropods as an important candidate group (new text, lines 566).

Are these modules going to exist anywhere apart from within this manuscript and subsequent manuscripts? It might be helpful to have a website that collects all these modules into one place for easy access, somewhat like the Earth microbiome project website.

>> We plan to place submodules in the iBioGen project webpage (<https://www.ibiogen.eu/deliverables.html>), together with this and subsequent manuscripts on this topic. Additionally, we have prepared a video explaining the details of the submodules proposed in this manuscript. This video is already available via the iBioGen webpage (see <https://www.ibiogen.eu/dissemination.html>). Please note, it still requires final editions to accommodate modifications resulting from this review process. Once updates have been implemented and our manuscript accepted, it will be disseminated through the social media of the iBioGen project, and the authors.

L 34: For inventorying biodiversity? For compiling biodiversity inventories?

>> Changed.

L 79: It is unclear whether "metabarcoding inventory data" means the data resulting from metabarcoding analyses, or the data about metabarcoding methods/workflows?

>> Clarified.

L 89: I think "global microbial initiatives" is missing something. Global microbial diversity assessment initiatives? Also, I'm not sure "(even if data generation has been centralised)" is needed.

>> Reworded.

L 94: What are eDNA initiatives, as opposed to metabarcoding initiatives?

>> Clarified.

L 98: "one of the most heterogeneous groups in terms of body size"?

>> Done.

L 99: I think it would be clearer to use "inventorying of" (i.e. compiling an inventory), rather than "inventory". (Inventorying is used elsewhere, e.g. L 108, 166).

>> Reworded.

L 110: "calibration and so" seems unnecessary.

>> Removed.

L 111: It's unclear to me why catalysis of a GO network is the key challenge. Perhaps consistent workflows are implicit in a GO network? But consistent workflows could exist without a GO network too. Can you clarify how a GO network helps?

>> We agree with the reviewer and have reworded to clarify (modified text, lines 112).

L 119-122: Arguably, bioinformatic processing of raw sequence data into processed data is another key step (depending on whether "data" is the raw sequence data, or processed OTU/ASV data). Evidently, this is not within the scope of the manuscript, but it might be worth mentioning somewhere that post-sequencing aspects of metabarcoding workflows can also vary a lot, resulting in incomparable datasets. However, this is less problematic because one can theoretically re-process the sequence data from different studies in a consistent manner.

>> We fully agree with the reviewer on the importance of harmonisation for the bioinformatic processing of raw sequence data, and we have recently published

specifically on this topic (Creedy et al. 2022 (our reference 34). We have now mentioned this aspect in the manuscript, as suggested by the reviewer (new text, lines 87).

L 140-142: This sentence is very confusing. "long-view" should probably be "long-term goal"; "synthetic analyses" sounds like analyses of synthetic (artificial or man-made) data; and I'm not sure what "a function of any collateral costs" means. Please rephrase.  
 >> Reworded.

L 144: minimal compromise, if any?  
 >> Reworded.

L 150: The declines of insects (plural) are now a very real and serious threat?  
 >> Corrected.

L 161: inventorying arthropod biodiversity?  
 >> Reworded.

L 162: Remove "in".  
 >> Done.

L 183-184: panacea? Might be better to say "no one method detecting the entire arthropod diversity within a site"  
 >> Done.

L 273: I'm not sure "for harmonisation" is needed here.  
 >> Removed.

L 321: Photographing of invertebrate samples is an excellent idea!  
 >> Thanks.

L 330: Would there be a benefit to trying to orient all the specimens in the same way, for potential future visual-based identifications? (probably time-consuming though).  
 >> This is ideal but very time-consuming in most types of arthropod bulk samples, that is why we did not include it.

L 307: "4mm sieve pooled 1:10 to 2:10" is unclear. Does it mean, the < 4mm and > 4mm fractions are pooled together at a ratio of 1:10 to 2:10? Which fraction is the higher ratio? Please clarify.  
 >> Clarified.

L 337: What is a SuperGO?  
 >> Within the spatially led terrestrial GO network that we propose in Arribas et al. 2021, SuperGOs are sites where molecular community data is more intensively generated at both the temporal and the genomic axes, consistent with the idea of "model ecosystems" (Davies et al., 2012, 2014). This has now been clarified in the text (new text, lines 351).

L 398-405: "COI-bcr" is unnecessary, only used in this paragraph. "COI barcode" is used on line 408 to mean the same thing, and is clearer. I suggest replacing "COI-bcr" on lines 401 and 405 with "COI barcode" and "COI barcode region", respectively.  
 >> Done.

L 405-406: This sentence should be rephrased. Multiple COI-targeted primer sets ... demonstrated to efficiently characterise arthropods ... particularly those with certain degenerate positions?  
 >> Reworded.

L 407: see Figure 2 in Elbrecht et al.? Should "second half" be 3' (prime)?  
 >> Done.

L 408-412: Can you provide citation for claims about BF3, and for primers BF2, III\_B\_F, Fol-degen-rev? I think the "primers within this region..." statement should be qualified with a word such as "published" or "tested". Maximum overlap of what among already published studies? (COI regions?) Do these primers have any limitations in terms of taxonomic coverage?  
 >> We have now provided references, and specifically cite Figure 2 in Elbrecht et al., [37] for a summary of the sequence, original citation and efficiency of each primer set (modified text, lines 424).

L 412: Why "eDNA metabarcoding" here, but just "metabarcoding" everywhere else?  
 >> Removed.

L 424: Citation missing?  
 >> Included.

L 471: Why would that be so? (Lower cost?)  
 >> Yes, clarified.

Table 5: What is BC3 fragment? I'm not sure how useful it is to recommend "degenerate primers" here - presumably it is certain specific COI-targeted degenerate primers that are recommended, not degenerate primers in general, in which case



|                                                                                                                                                                                                                                                                                                                                                                                                                                                                                                                                     |                                                                                                                                                                                                                                                                                                                                                                                                         |
|-------------------------------------------------------------------------------------------------------------------------------------------------------------------------------------------------------------------------------------------------------------------------------------------------------------------------------------------------------------------------------------------------------------------------------------------------------------------------------------------------------------------------------------|---------------------------------------------------------------------------------------------------------------------------------------------------------------------------------------------------------------------------------------------------------------------------------------------------------------------------------------------------------------------------------------------------------|
|                                                                                                                                                                                                                                                                                                                                                                                                                                                                                                                                     | <p>should they be listed here?<br/>         &gt;&gt; We have added additional details to Table 5 to clarify these aspects already included in the text.<br/>         L 533: I'm not sure what canalisation means. Replace with harmonisation?<br/>         &gt;&gt; Replaced.<br/>         L 539-540: "of modules" seems repetitive (of submodules) and unnecessary.<br/>         &gt;&gt; Removed.</p> |
| <b>Additional Information:</b>                                                                                                                                                                                                                                                                                                                                                                                                                                                                                                      |                                                                                                                                                                                                                                                                                                                                                                                                         |
| <b>Question</b>                                                                                                                                                                                                                                                                                                                                                                                                                                                                                                                     | <b>Response</b>                                                                                                                                                                                                                                                                                                                                                                                         |
| Are you submitting this manuscript to a special series or article collection?                                                                                                                                                                                                                                                                                                                                                                                                                                                       | No                                                                                                                                                                                                                                                                                                                                                                                                      |
| <p><b>Experimental design and statistics</b></p> <p>Full details of the experimental design and statistical methods used should be given in the Methods section, as detailed in our <a href="#">Minimum Standards Reporting Checklist</a>. Information essential to interpreting the data presented should be made available in the figure legends.</p> <p>Have you included all the information requested in your manuscript?</p>                                                                                                  | Yes                                                                                                                                                                                                                                                                                                                                                                                                     |
| <p><b>Resources</b></p> <p>A description of all resources used, including antibodies, cell lines, animals and software tools, with enough information to allow them to be uniquely identified, should be included in the Methods section. Authors are strongly encouraged to cite <a href="#">Research Resource Identifiers</a> (RRIDs) for antibodies, model organisms and tools, where possible.</p> <p>Have you included the information requested as detailed in our <a href="#">Minimum Standards Reporting Checklist</a>?</p> | Yes                                                                                                                                                                                                                                                                                                                                                                                                     |
| <p><b>Availability of data and materials</b></p> <p>All datasets and code on which the conclusions of the paper rely must be either included in your submission or deposited in <a href="#">publicly available repositories</a></p>                                                                                                                                                                                                                                                                                                 | Yes                                                                                                                                                                                                                                                                                                                                                                                                     |

(where available and ethically appropriate), referencing such data using a unique identifier in the references and in the “Availability of Data and Materials” section of your manuscript.

Have you have met the above requirement as detailed in our [Minimum Standards Reporting Checklist?](#)

# **Toward global integration of biodiversity big data: a harmonised metabarcoding data generation module for terrestrial arthropods**

Paula Arribas<sup>1\*</sup>, Carmelo Andújar<sup>1</sup>, Kristine Bohmann<sup>2</sup>, Jeremy R. deWaard<sup>3,4</sup>, Evan P. Economo<sup>5</sup>, Vasco Elbrecht<sup>6</sup>, Stefan Geisen<sup>7</sup>, Marta Goberna<sup>8</sup>, Henrik Krehenwinkel<sup>9</sup>, Vojtech Novotny<sup>10,11</sup>, Lucie Zinger<sup>12,13</sup>, Thomas J. Creedy<sup>14</sup>, Emmanouil Meramveliotakis<sup>15</sup>, Víctor Nogueras<sup>1</sup>, Isaac Overcast<sup>12</sup>, Hélène Morlon<sup>12</sup>, Anna Papadopoulou<sup>15</sup>, Alfried P. Vogler<sup>14,16</sup>,  
Brent C. Emerson<sup>1</sup>

ORCID iDs: Paula Arribas [0000-0002-0358-8271]; Carmelo Andújar [0000-0001-9759-7402]; Kristine Bohmann [0000-0001-7907-064X];  
Jeremy R deWaard []; Evan P Economo []; Vasco Elbrecht [0000-0003-4672-7099]; Stefan Geisen [0000-0003-0734-727X]; Marta Goberna  
[0000-0001-5303-3429]; Henrik Krehenwinkel [NA]; Vojtech Novotny [0000-0001-7918-8023]; Lucie Zinger [0000-0002-3400-5825]; Thomas  
J Creedy [0000-0002-7611-291X]; Emmanouil Meramveliotakis []; Víctor Nogueras [0000-0003-3185-778X]; Isaac Overcast [0000-0001-  
8614-6892]; Hélène Morlon [0000-0002-3195-7521]; Anna Papadopoulou [0000-0002-4656-4894]; Alfried P Vogler [0000-0002-2462-3718];  
Brent C Emerson [0000-0003-4067-9858]

<sup>1</sup> Island Ecology and Evolution Research Group, Institute of Natural Products and Agrobiology (IPNA-CSIC), San Cristóbal de la Laguna, Spain.

<sup>2</sup> Section for Evolutionary Genomics, Globe Institute, Faculty of Health and Medical Sciences, University of Copenhagen, Denmark.

<sup>3</sup> Centre for Biodiversity Genomics, University of Guelph, Guelph, Canada.

<sup>4</sup> School of Environmental Sciences, University of Guelph, Guelph, Canada.

<sup>5</sup> Biodiversity and Biocomplexity Unit, Okinawa Institute of Science and Technology Graduate University, Japan.

<sup>6</sup> Centre for Biodiversity Monitoring (ZBM), Zoological Research Museum Alexander Koenig, Adenauerallee 160, D-53113 Bonn, Germany.

<sup>7</sup> Laboratory of Nematology, Department of Plant Sciences, Wageningen University and Research, 6708PB Wageningen, The Netherlands.

<sup>8</sup> Department of Environment and Agronomy, INIA-CSIC, Madrid, Spain.

30 <sup>9</sup>Department of Biogeography, Trier University, Trier, Germany.

31 <sup>10</sup>Biology Centre, Czech Academy of Sciences, Institute of Entomology, 37005 Ceske Budejovice, Czech  
32 Republic.

33 <sup>11</sup>Faculty of Science, University of South Bohemia, 37005 Ceske Budejovice, Czech Republic.

34 <sup>12</sup> Institut de Biologie de l'ENS (IBENS), Département de biologie, École normale supérieure, CNRS,  
35 INSERM, Université PSL, 75005 Paris, France.

36 <sup>13</sup>Naturalis Biodiversity Center, Leiden, The Netherlands

37 <sup>14</sup>Department of Life Sciences, Natural History Museum, London, UK.

38 <sup>15</sup>Department of Biological Sciences, University of Cyprus, Nicosia, Cyprus.

39 <sup>16</sup>Department of Life Sciences, Imperial College London, London, UK.

40 \*Corresponding author: [pauarribas@ipna.csic.es](mailto:pauarribas@ipna.csic.es) <https://orcid.org/0000-0002-0358-8271>

## 41 **Abstract**

42 Metazoan metabarcoding is emerging as an essential strategy for **inventorying biodiversity**, with  
43 diverse projects currently generating massive quantities of community-level data. The potential  
44 for integrating across such datasets offers new opportunities to better understand biodiversity and  
45 how it might respond to global change. However, large-scale syntheses may be compromised if  
46 metabarcoding workflows differ from each other. There are ongoing efforts to improve  
47 standardisation for the reporting of inventory data. However, harmonisation at the stage of  
48 generating metabarcode data has yet to be addressed. A modular framework for harmonised data  
49 generation offers a pathway to navigate the complex structure of terrestrial metazoan biodiversity.  
50 Here, through our collective expertise as practitioners, method developers and researchers leading  
51 metabarcoding initiatives to inventory terrestrial biodiversity, we seek to initiate a harmonised  
52 framework for metabarcode data generation, with a terrestrial arthropod module. We develop an  
53 initial set of submodules covering the five main steps of metabarcode data generation: (i) sample  
54 acquisition, (ii) sample processing, (iii) DNA extraction, (iv) PCR amplification, library  
55 preparation and sequencing, and (v) DNA sequence and metadata deposition, providing a  
56 backbone for a terrestrial arthropod module. To achieve this, we (i) identified key points for  
57 harmonisation; (ii) reviewed the current state of the art; and (iii) distilled existing knowledge  
58 within submodules, thus promoting best practice by providing guidelines and recommendations to  
59 reduce the universe of methodological options. We advocate the adoption and further development  
60 of the terrestrial arthropod module. We further encourage the development of modules for other  
61 biodiversity fractions, as an essential step toward large-scale biodiversity synthesis through  
62 harmonization.

63

64 **Keywords**

65 Metabarcoding, arthropods, harmonisation, data generation, modular structure, biodiversity  
66 inventory, biodiversity big data integration, reproducibility, comparability.

67

68 **Main text**

69 **Background**

70 DNA metabarcoding, involving PCR-coupled high-throughput sequencing (HTS) directly from  
71 bulk or environmental samples, represents the most cost-efficient approach for obtaining  
72 molecular community profiles [1,2]. Metabarcoding is increasingly being used to characterise and  
73 monitor biodiversity, and is recognised as a substantial advance leading to a step change in  
74 multiple fields of biodiversity science (e.g. [3–5]). Diverse projects, from local to global scales,  
75 are currently generating massive quantities of site-based community-level biodiversity inventory  
76 data, including hyperdiverse assemblages or groups for which classical sampling and identification  
77 is overly complicated and time-consuming. The potential for integrating across such data, from  
78 diverse sources and time series, offers new opportunities to better understand how biodiversity is  
79 structured in space and time, and the factors that regulate it. Additionally, such integration can be  
80 leveraged for better monitoring and the development of holistic biodiversity conservation  
81 strategies, in response to global change [4,6,7]. However, collective international efforts are  
82 required to achieve optimal global integration and synthesis. While integrative efforts for  
83 harmonised site-based genomic inventories exist in the microbial realm (e.g. [8–10]), such a  
84 framework has yet to be extended to non-microbial fractions of biodiversity. However, there is an  
85 emerging consensus that such integration can be achieved within a HTS framework, analogous to  
86 the Genomic Observatories (GO) concept, first proposed by Davies et al., [11,12]. If effective  
87 strategies can be developed to harmonise the data resulting from metabarcoding studies (i.e.  
88 metabarcode inventory data), these can potentially scale up to a non-centralised network within

89 which global patterns and trends of biodiversity can be addressed [13].

90         There are ongoing efforts to maximise the potential for integrating across independent  
91 biodiversity data sets through improved standardisation for the reporting of inventory data  
92 (Humboldt Core: [14]). In the case of molecular data specifically, the GEOME initiative [15,16]  
93 promotes standardisation for the reporting of taxonomic, genomic and metadata through  
94 customisable yet standard-compliant spreadsheets that capture the temporal and geospatial context  
95 of a biosample. While recommendations have been made for the harmonisation of bioinformatic  
96 processing of raw metabarcode read data from metazoan biodiversity fractions [17], harmonisation  
97 at the stage of generating such metabarcode data has yet to be addressed, and thus remains a  
98 fundamental impediment for data integration. The success of global microbial diversity assessment  
99 initiatives has pivoted on standardised metabarcoding protocols for sampling, DNA extraction,  
100 barcode amplification/enrichment and library generation and sequencing of microbial/planktonic  
101 communities (e.g. [18,19] for the Earth Microbiome Project, EMP or [20–22] for the TARA  
102 Oceans and the Ocean Sampling Day, OSD). Despite pioneering efforts to harmonise metabarcode  
103 data generation beyond microbial biodiversity fractions (e.g. see [23,24]) further efforts are  
104 required within this expanding research area.

## 105 **A harmonised framework for the generation of metabarcode data for** 106 **terrestrial animals**

107 Terrestrial metazoans constitute one of the most heterogeneous groups in terms of body size across  
108 the tree of life. Metabarcoding is emerging as an important approach for the inventorying of  
109 metazoan diversity, and is increasingly being used across the fields of community ecology,  
110 evolutionary ecology, biogeography, conservation biology, and environmental management,  
111 among others. Given the rapid development of data generation in this area, the potential for  
112 downstream synthesis across independently generated data sets may be compromised if divergent  
113 strategies are being implemented. There is already concern that nuances in metabarcoding

114 workflows make comparisons difficult (e.g. [25–28]). Guidance for the implementation of  
115 effective and robust sampling and sample-processing approaches is both timely and essential, and  
116 will increase the potential for broader benefits to biodiversity science through harmonisation. We  
117 believe that the overarching goal of a harmonised metabarcode framework for inventorying  
118 biodiversity should be to reduce unnecessary heterogeneity in the generation of metabarcode data,  
119 thus **facilitating comparability and integration** among independent metabarcode data sets. The  
120 **development and implementation of consistent workflows for data generation is a key step for the**  
121 **bottom-up growth of a GO network** for global integration and synthesis within biodiversity  
122 science, **while the challenge is to also allow flexibility** to successfully address objectives at the  
123 individual project level.

124         It has previously been argued that a harmonised framework with a “modular” structure for  
125 data generation could offer a pathway to navigate through the complex structure of terrestrial  
126 metazoan biodiversity, by placing different fractions of **terrestrial diversity at the core** of each  
127 “module” [13]. Within such a framework, best practices and harmonised protocols for the  
128 generation of metabarcode data can be developed for different target fractions of biodiversity (e.g.  
129 terrestrial arthropods). Within individual modules, submodules serve as the fundamental building  
130 blocks that provide guidelines and recommendations for the five key steps to generate metabarcode  
131 data: (i) sample acquisition, (ii) sample processing, (iii) DNA extraction, (iv) PCR amplification,  
132 library preparation and sequencing, and (v) DNA sequence and metadata deposition. Different  
133 data generation pipelines can be configured within a module by choosing among submodule  
134 options, allowing for variable requirements of different assemblages within the module (e.g.  
135 flying, aquatic or ground arthropods within a terrestrial arthropod module), and different sample  
136 vouchering needs (e.g. destructive vs non-destructive DNA extraction). Such a modular structure  
137 provides a harmonised framework for comparability across independent studies, by reducing  
138 redundant efforts, and improving reporting and comparability, while retaining flexibility to

139 incorporate additional submodules as the need arises (see Figure 1, a schematic representation of  
140 the proposed modular structure).

141 Here, through our collective expertise as practitioners of metabarcoding, method  
142 developers and researchers leading metabarcoding initiatives to inventory terrestrial arthropod  
143 biodiversity, we seek to initiate a harmonised framework for the generation of terrestrial metazoan  
144 metabarcode data. Specifically, we aim to provide an initial set of submodules (black blocks in  
145 Fig. 1) covering the five main steps of metabarcode data generation (rows 1 to 5 in Fig.1) that  
146 constitute the backbone of a terrestrial arthropod module (red block in Fig.1). We first: (i) identify  
147 key points for harmonisation within each of the five steps; (ii) review the current state of the art  
148 within the arthropod metabarcoding literature, and then; (iii) distil existing information and  
149 knowledge within submodules, thus promoting best practice by providing guidelines and  
150 recommendations to reduce the universe of methodological options. Standardisation or  
151 harmonisation of methods will, in some contexts, lead to trade-offs against what might be  
152 considered perfect methods [29]. Such trade-offs may limit the uptake of harmonised protocols,  
153 thus compromising the discovery of unifying principles from analyses synthesising across  
154 comparable studies. Thus, rather than being overly prescriptive, we seek to propose a flexible  
155 framework that can be opted into with minimal compromise, to increase the comparative value of  
156 metabarcode data.

## 157 **Harmonisation for the metabarcoding of terrestrial arthropods: the terrestrial** 158 **arthropods module**

159 There are multiple reasons why techniques for inventorying and monitoring terrestrial arthropod  
160 biodiversity are urgently needed. Firstly, arthropods comprise the majority of known animal  
161 species in terrestrial habitats. It has been estimated that there are 5.5 million insect species on  
162 Earth, most yet to be discovered, and up to 6.8 million species (range 5.9–7.8 million) for all  
163 terrestrial arthropods [30]. In addition to this high diversity, arthropods present vast trait variation,



164 which imposes a substantial challenge for assessing their responses to environmental change. We  
165 now face the challenge of declining arthropod abundance and richness, a very real and serious  
166 threat that society must urgently address [31,32]. Arthropods are also a key biodiversity fraction  
167 for monitoring because they include many invasive species [33], requiring comparable baseline  
168 data to study the potential susceptibility and responses of communities to invasion. DNA  
169 metabarcoding has emerged as a powerful approach for characterising complex, and in many cases  
170 largely unknown, arthropod assemblages [7,34]. In response to this, researchers from diverse  
171 disciplines are shifting from conventional inventorying of arthropod diversity to DNA  
172 metabarcoding, with evidence for exponential growth uptake [17]. Indeed, adaptations of  
173 microbial metabarcoding approaches to the macroscopic component of diversity have been heavily  
174 influenced by their application to the arthropod fauna (see [1,35] for pioneering studies).  
175 Metabarcoding of DNA extracted from bulk samples of whole organisms (whole organism  
176 community DNA, wocDNA) is: (i) the most common and straightforward metabarcoding  
177 approach to inventory arthropod biodiversity; (ii) comparable to standard methods of arthropod  
178 monitoring, and; (iii) has high potential for harmonisation [27].

179 Data generation practices for the metabarcoding of arthropod community samples are still  
180 in the early stages. Through the development and adoption of a standardized terrestrial arthropod  
181 data generation module, the potential for comparability across future large-scale biodiversity  
182 inventorying efforts can be optimised. There is sufficient background from which  
183 recommendations can be developed (e.g. [36–40]) to guide methodological decisions within the  
184 emerging research community. Recent global initiatives that pivot on arthropod wocDNA also  
185 provide a critical mass for developing harmonised data generation, while simultaneously  
186 highlighting the relevance and timeliness of a terrestrial arthropod module. These initiatives  
187 include the BIOSCAN initiative (<https://ibol.org/programs/bioscan/>) and its regional extensions  
188 such as BIOSCAN Europe (<https://www.bioscaneurope.org/>), BioAlfa, the Kruger Malaise

189 Program [41], the SITE-100 project (<https://www.site100.org/>), the Insect Biome Atlas Project  
190 (<https://insectbiomeatlas.org>), LIFEPLAN (<https://www.helsinki.fi/en/projects/lifeplan>), and the  
191 OKEON initiative (<https://okeon.unit.oist.jp/>).

192 ***Identifying key points of harmonisation for submodules within each data***  
193 ***generation step***

194 **1. Sample acquisition step**

195 A starting point for integration across independent biodiversity inventory efforts is a harmonised  
196 sample definition. In the case of terrestrial arthropods, sample definition is strongly linked to the  
197 sampling technique implemented. There is extensive evidence that different arthropod mass  
198 sampling techniques have differing capture efficiencies with regard to total community  
199 assemblages within which they are deployed, with no one method detecting the entire arthropod  
200 diversity within a site [42]. In this context, with the aim of standardizing insect inventorying and  
201 monitoring methods, Montgomery et al., [43] proposed seven main sampling methods with the  
202 aim of maximising data integration across insect monitoring efforts, including: (i) Malaise  
203 trapping, (ii) light trapping, (iii) pan trapping, (iv) pitfall trapping, (v) beating sheets, (vi) acoustic  
204 monitoring, and (vii) active visual surveys. These complementary sampling methods provide an  
205 appropriate platform from which to develop sample acquisition submodules, which could be  
206 implemented individually or combined for more complex sampling designs.

207 Most implementations of wocDNA metabarcoding to date are Malaise-trap based, at scales  
208 ranging from local to global (e.g. [44–49]). Additionally, Malaise traps are frequently deployed  
209 together with other sampling techniques to generate plot-based arthropod inventory data (e.g. [50],  
210 SITE100, ForestGEO arthropod protocol), and are the sampling strategy of the Global Malaise  
211 Trap Program/BIOSCAN initiative [44], with more than 10K samples already generated  
212 worldwide. Malaise traps [51] are primarily effective for sampling flying insects (e.g. [52]) but  
213 have gained popularity for assessing terrestrial arthropod communities (e.g. [53]), and have been

214 proposed as ideal for insect biomonitoring using metabarcoding [43,50]. Once installed, they  
215 require limited effort and can yield clean samples comprising almost exclusively arthropods, and  
216 in very large numbers (up to 10,000 specimens per week in some cases). Moreover, they can  
217 remain in place and yield new samples through passive sampling with low handling time, making  
218 them suitable for time-resolved monitoring. Given these considerations, Malaise traps are an  
219 obvious sampling submodule candidate.

220       Following the recommendations of Montgomery et al., [43], together with operational  
221 procedures adopted within the BIOSCAN initiative  
222 (<https://biodiversitygenomics.net/resources/bioscan>), Townes-style Malaise traps are preferred,  
223 with a 165 × 110 cm interception area being most common, and 95% ethanol as the preservation  
224 agent (see [50]) but propylene glycol (ratio of 50-100% propylene glycol, with water is frequently  
225 recommended as evaporation is negligible compared to ethanol and adequately preserves DNA  
226 [54,55]). Sampling effort has typically been delimited to one week within most metabarcoding  
227 studies, representing a compromise between maximising sampling effort and reducing potential  
228 problems with DNA degradation [38]. The Malaise trap should preferably be placed at the centre  
229 of the habitat patch to be characterised and, when possible, the trap should be positioned at a right  
230 angle to the dominant insect flight line. While submodule implementation can be restricted to a  
231 single trap, we emphasize that biological replicates (simultaneous Malaise trapping events) are  
232 desirable within the same habitat patch [56], and can provide useful information regarding  
233 sampling efficiency (see e.g. [57,58] for occupancy modelling using some means of sampling  
234 replication for insects). Similarly, temporal replication is also desirable, considering the possible  
235 variability due to changing environmental conditions for optimal arthropod activity, and species-  
236 specific idiosyncrasies. If temporal replication is not possible, trapping during maximum activity  
237 periods for flying insects is desirable. See Table 1 for a summary of key guidelines and  
238 recommendations for the 1.1 Malaise trapping sample acquisition submodule.

239 Recording metadata associated with sampling is also an important action for  
240 harmonisation. Our opinion converges on a minimum set of metadata attributes for each sample:  
241 (i) the geographical coordinates of the Malaise trap; (ii) the date and time interval for the sampling  
242 event, and; (iii) photo recording (ideally a 360° photo around each trap) of the habitat patch within  
243 which the Malaise trap is placed. In agreement with Montgomery et al. [43], we also recommend  
244 metadata reporting for the presence of rainfall, or extreme weather events during the trapping.  
245 Detailed characterisation of habitat and microhabitats within sampling sites would require time  
246 and resources that may limit module uptake. If needed, environmental characterisation of sampling  
247 sites can potentially be extracted from remote sensing data (see [4]). For additional information  
248 on metadata reporting, see section 5, DNA sequence and metadata sharing and storage.

249 Sample storage conditions, as the endpoint of the sample acquisition chain, carry  
250 implications for downstream data quality, and are thus an important focus for harmonisation.  
251 Sample storage conditions are consequential for the degradation of target DNA and/or the  
252 proliferation of non-target biomass in the sample. As such, they can strongly impact  
253 metabarcoding biodiversity profiles [59]. However, the effect of this bias on mock arthropod  
254 samples, at least for short-term storage (i.e. < 1 month), is of limited importance (see [38]). In the  
255 case of longer storage of arthropod community samples, we strongly recommend the use of >95%  
256 molecular grade ethanol as a preservative using leak-proof glass or plastic vials or jars [60],  
257 ensuring that the entire bulk sample is fully submerged before storage and then storage conditions  
258 of -20 or -80°C. In the case of storage or transport safety constraints, propylene glycol (undiluted)  
259 can be used as an alternative to ethanol [61]. Such an approach will limit inherent biases in  
260 inventory data due to irregular DNA degradation. The storage of biological replicates is always  
261 desirable (Table 1).

262

263 **Table 1.** Summary of key guidelines and recommendations within the *1.1 Malaise trapping*  
 264 *sample acquisition submodule.*

| <b>1.1 Malaise trapping sample acquisition submodule</b> |                                                                                                                                                                                                                                                                  |
|----------------------------------------------------------|------------------------------------------------------------------------------------------------------------------------------------------------------------------------------------------------------------------------------------------------------------------|
| Sample definition                                        | Townes-style Malaise trap (165 × 110 cm interception area)<br>One week per sample<br>Collecting fluid: >95% ethanol/propylene glycol<br>Centre in habitat patch location<br>Position perpendicular to natural flight corridor<br>Spatial and temporal replicates |
| Sampling event metadata                                  | Geographical coordinates<br>Date and period of trapping<br>Photo recording for habitat and microhabitat<br>Extreme weather events during trapping                                                                                                                |
| Sample storage                                           | >95% molecular grade ethanol/propylene glycol<br>Fully submerged biomass<br>Storage conditions of -20° or -80°C                                                                                                                                                  |

265

266 While Malaise trapping is notably efficient for aerially active arthropods, species with low  
 267 mobility are less likely to be sampled (e.g. [62]). In this context, pitfall trapping offers a  
 268 complementary passive sampling technique for ground active arthropods, and thus we consider it  
 269 to be an appropriate candidate for the development of a complementary sampling submodule. The  
 270 joint implementation of malaise and pitfall trapping represents an appropriate compromise to limit  
 271 the diversity of sampling techniques implemented, while seeking to capture a broad representation  
 272 of arthropod biodiversity. Pitfall traps [63] are containers buried in the ground with their rim at  
 273 surface level to capture ground-dwelling (epigeic) insects. Pitfall traps are the most effective  
 274 method for sampling ground active arthropods, and are an established and popular monitoring  
 275 technique (e.g. the US National Ecological Observatory Network [NEON], [54]; the UK  
 276 Environmental Change Network, [64]). Pitfall and Malaise traps are highly complementary,  
 277 sampling largely non-overlapping fractions of arthropod assemblages with reduced additional

278 effort, and they have already been jointly applied in several wocDNA metabarcoding studies (e.g.  
279 [48]).

280         Guidelines for standardising pitfall trapping, based on a review of the existing literature  
281 [65], have recommended plastic cups with 11 cm diameter and 9-11 cm depth, and a roof raised  
282 1.5 cm above the trap entrance. The number of individuals sampled per trap can be limited, and as  
283 such, composite samples from multiple pitfall traps can be used to increase the sampling effort.  
284 There is some controversy over how far apart traps should be placed to be considered as  
285 independent samples (e.g. [66,67]). We suggest that the NEON protocol [54] provides a suitable  
286 framework for harmonisation, within which a composite sample is generated using four pitfall  
287 traps arranged at the corners of a square with sides of 25 m. While submodule implementation can  
288 be restricted to a single composite sample (four pitfall traps), biological replicates are desirable  
289 (e.g. [54]), and can be achieved by allowing several metres between replicate traps within each  
290 corner. Sampling effort is defined by the trapping interval and varies across studies, typically  
291 ranging from three days to four weeks (e.g. [48,54,68]). One week provides an appropriate interval,  
292 and facilitates coordination with the setting and servicing of Malaise traps. Temporal replication  
293 is also desirable and if not possible, trapping should be targeted toward periods of maximum  
294 arthropod activity [54]. Propylene glycol (ratio of 50-100% propylene glycol, with water; for a  
295 total volume between 100 and 200 mL, depending upon the dilution ratio) is the most frequently  
296 recommended collecting medium, as evaporation is negligible compared to ethanol, it is odourless,  
297 and it adequately preserves DNA ([54,55], Table 2).

298         Similar to Malaise traps, a minimum set of metadata attributes for each pitfall composite  
299 sample should include: (i) the geographical coordinates of the trap, (ii) period of the trapping event  
300 and (iii) photo recording (ideally a 360° photo around each trap). Following Montgomery et al.  
301 [43], we also recommend metadata reporting for the presence of rainfall or extreme events during  
302 sampling. Finally, in order to minimise the degradation of target DNA and/or the proliferation of

303 non-target biomass in the sample during medium-long term storage, we strongly recommend the  
 304 use of >95% molecular grade ethanol, or propylene glycol, as described above for Malaise trap  
 305 samples). See Table 2 for key guidelines and recommendations of the 1.2 Pitfall trapping sample  
 306 acquisition submodule.

307

308 **Table 2.** Summary of key guidelines and recommendations within the *1.2 Pitfall trapping sample*  
 309 *acquisition submodule*.

| <b>1.2 Pitfall trapping sample acquisition submodule</b> |                                                                                                                                                                                                                                                                             |
|----------------------------------------------------------|-----------------------------------------------------------------------------------------------------------------------------------------------------------------------------------------------------------------------------------------------------------------------------|
| Sample definition                                        | Plastic cups with diameter: 11 cm, depth: 9-11 cm, and a roof raised 1.5 cm<br>Composite sample (four pitfall traps, placed at the corners of a square with sides of 25 m).<br>One week per sample<br>Collecting fluid: propylene glycol<br>Spatial and temporal replicates |
| Sampling event metadata                                  | Geographical coordinates<br>Date and period of trapping<br>Photo recording for habitat and microhabitat<br>Extreme weather events during trapping                                                                                                                           |
| Sample storage                                           | >95% mol grade ethanol/50%-95% propylene glycol<br>Fully submerged biomass<br>Storage conditions of -20° or -80°C                                                                                                                                                           |

310

## 311 **2. Sample processing step**

312 In contrast to microbial or environmental DNA (eDNA) approaches, where samples can be directly  
 313 processed for DNA extraction, the macroscopic nature of arthropod community samples has led  
 314 to a broad range of sample processing protocols, among which size sorting is the most common.  
 315 Size sorting is often used because larger specimens tend to release more DNA and may dominate  
 316 the total sequence count in metabarcoding data [69]. Thus, sorting invertebrates into multiple size  
 317 classes and then pooling the digested tissue according to DNA concentration, abundance or  
 318 richness in each class has become common practice (e.g. [1,70,71]), and size sorting has revealed

319 improved efficiency in the detection of low biomass species (e.g. [40,70]). However, increasing  
320 sequencing depth can also increase taxon recovery to comparable levels without size sorting [72].  
321 More generally, it has been suggested that with sufficient sequencing depth and within reasonable  
322 size ranges, species recovery is not skewed by variable biomass of species, and that a size sorting  
323 step need not be carried out [71]. Please see the section '4 Amplification, library preparation and  
324 sequencing step' for details on sequencing depth. In addition to the fact that handling time for size  
325 sorting places high logistical constraints for large-scale studies, size sorting procedures also reduce  
326 comparability across independent initiatives if not fully harmonised. Given these considerations,  
327 we consider size sorting to be unnecessary for a harmonised approach, but if incorporated it should  
328 be of limited complexity (e.g. wet sieving into two size fractions, 4 mm sieve pooled 1:10 to 2:10  
329 (> 4 mm : < 4 mm), [72]) and properly reported. Removing any form of biomass sorting/sample  
330 picking steps will also improve cost-effectiveness and facilitate broad implementation for  
331 biomonitoring [27].

332 Biomass and abundance information is often fundamental for biodiversity analysis,  
333 including the global assessment of arthropod decline (see [73]). However, deriving abundance  
334 information from metabarcode data remains a challenge, primarily due to inherent biases during  
335 PCR amplification, but also because of variation in gene copy number, organelle number, and  
336 technical aspects of workflows for sampling, laboratory procedures, sequencing and bioinformatic  
337 processing [5,69,74]. Given these considerations, we consider that an arthropod community  
338 sample processing submodule should emphasise the importance of (i) providing a wet weight  
339 measurement for each sample and (ii) generating arthropod community sample photographs. Wet  
340 mass measurement can be used as a surrogate for sample biomass. It can be easily obtained from samples  
341 after filtering off excess ethanol using a nylon filtration fabric that retains smaller specimens (e.g. 20 µm  
342 filters).

343 Photographic recording is not a commonly reported practice, but looking forward we think  
344 it is very likely that the integration of quantitative morphological and molecular approaches will



345 be an important area of interest and development [75]. There is potential for image-based specimen  
346 identification involving machine learning tools to be applied as an external validation of  
347 molecular-based diversity estimations, particularly for arthropod groups with limited cryptic  
348 variation between species [75–77]. While obtaining high-quality images of arthropod community  
349 samples may be time-consuming, we recommend, as a minimum, that such images should be taken  
350 at high-resolution using a conventional stereoscope equipped with a built-in microscope camera  
351 or an external single lens reflex (SLR) camera with macro lens, over a white background (ideally  
352 submerged under ethanol in a plastic tray), and minimising the overlap among individuals to  
353 provide a physical record of the sample. Vouchering selected specimens may be considered  
354 unnecessary when well-parameterized reference libraries are available (e.g. [78]), but is otherwise  
355 an important consideration for future taxonomic assignment of metabarcoding reads and for  
356 completing reference barcode databases (e.g. following BOLD guidelines, see [50,79]).  
357 Vouchering also provides a resource for potential parallel efforts to generate high-throughput  
358 specimen-based genomic resources (i.e. partial or complete genomes, microbiomes, diet) for sites  
359 of special interest (SuperGOs, [13], i.e. sites where molecular community data is intensively  
360 generated at both the temporal and the genomic axes, consistent with the idea of ‘model  
361 ecosystems’). Vouchered barcode sequences are also of particular relevance for bioinformatic  
362 processing of metabarcode reads. It has been demonstrated that such sequences are fundamental  
363 for efficient and validated filtering of nuclear copies of mitochondrial sequences, and that they  
364 control for taxonomically inflated estimates of community composition [80]. While sample  
365 processing is not the most problematic step for cross-contamination, contamination issues have  
366 been reported (e.g. [81]), and at least basic equipment cleaning between samples is required. See  
367 Table 3 for key guidelines and recommendations of the arthropod community sample processing  
368 submodule.

369

370 **Table 3.** Summary of key guidelines and recommendations within the *2.1 Arthropod community*  
 371 *sample processing submodule.*

| <b>2.1 Arthropod community sample processing submodule</b> |                                                                                             |
|------------------------------------------------------------|---------------------------------------------------------------------------------------------|
| Sample wet mass weight                                     | 20 µm nylon filtration fabric                                                               |
| Sample photography                                         | White background<br>Ethanol submerged (white tray)<br>Photographic scale                    |
| Size sorting                                               | Minimise size sorting<br>4 mm sieve                                                         |
| Vouchering specimens                                       | Random or directed selection of specimens for being individually DNA extracted and barcoded |

372

### 373 **3. DNA extraction step**

374 A fundamental consideration for harmonising wocDNA extraction concerns whether a pre-  
 375 extraction homogenisation-grinding step (thus implying destruction of the specimens within an  
 376 arthropod community sample) is needed. Such a step can facilitate homogeneous digestion across  
 377 specimens, and reduce digestion volumes. It is often achieved through manual grinding in a mortar  
 378 after freezing in liquid nitrogen, or grinding in ethanol, or mechanical bead beating. Non-  
 379 destructive extraction protocols have been developed for unsorted arthropod samples to maintain  
 380 exoskeletal integrity (e.g. [61,70,82]). Using mock arthropod community samples generated from  
 381 material collected in Malaise traps, Nielsen et al., [82] found that homogenised samples yielded  
 382 more DNA, but generally produced more inconsistent results when compared to non-destructive  
 383 extraction. **When assessing the recovered taxonomic content of samples using operational**  
 384 **taxonomic units (OTUs)**, intact samples performed at least comparable to, if not better than,  
 385 homogenised samples. Thus, considering that efficiency seems to be comparable, avoiding a  
 386 homogenisation step will: (i) reduce potential heterogeneity among studies; (ii) reduce processing  
 387 time; (iii) reduce contamination risk, and; (iv) maintain a physical archive accessible for future

388 developments in image classification using deep learning for the extraction of additional data, such  
389 as abundances (see 2. Sample processing). Given these considerations, non-destructive DNA  
390 extraction should be a core feature of the arthropod community sample DNA extraction  
391 submodule. When necessary (e.g. soil arthropods where a large fraction have hard exoskeletons,  
392 see [83]), semi-destructive or destructive extraction submodules will need to be developed. Non-  
393 destructive DNA extractions require large volumes of digestion buffer to extract wocDNA.  
394 Nielsen et al. [82] have demonstrated that OTU diversity estimates are not influenced by the  
395 (sub)volume of digestion buffer that is subsequently purified. Given this consideration, typical  
396 commercial kit extraction volumes of 100-200 µl can be considered an appropriate sub-sampling  
397 volume for subsequent purification.

398 A broad range of DNA extraction protocols are being applied to wocDNA metabarcoding.  
399 It remains unclear how different extraction methods might impact downstream results, as there is  
400 contrasting evidence on its importance based on eDNA approaches [19,84]. Manual (column-  
401 based) and robotic (bead-based) implementations of the Qiagen DNeasy Blood & Tissue kit and  
402 homologous kits have been widely used for extracting wocDNA from terrestrial invertebrates [34].  
403 There is little evidence for PCR inhibitor issues for DNA extracts from arthropod community  
404 samples (but see [85]), and if they occur they can be appropriately accounted for through dilution  
405 of DNA extracts before PCR amplification (see next section). Given these considerations, simple  
406 and efficient kit-based protocols that allow sample extraction at scale (e.g. Qiagen DNeasy Blood  
407 & Tissue, and analogous kits, see [86]) provide an appropriate basis for harmonisation. Negative  
408 controls and technical replicates are fundamental for quality control and can be used to filter out  
409 artefactual sequences [87], and as such their incorporation in the extraction step will also facilitate  
410 validation and integration of data across studies.

411 Biobanking of DNA from environmental samples has been strongly advocated for long-  
412 term biomonitoring [88]. Biobanking of DNA ensures opportunities for re-analysis of past data

413 sets with future technologies, an important consideration given high method turnover and  
 414 associated comparability issues. Aliquots of purified wocDNA are suitable for archiving, ideally  
 415 using low-DNA binding tubes and freezers of -80 °C or colder, but if this option is unavailable,  
 416 storage at -20 °C in non-defrosting freezers provides an adequate alternative. Several museums are  
 417 already offering this service with affordable pricing (e.g. Smithsonian & Canadian museum in  
 418 Ottawa). See Table 4 for key guidelines and recommendations for the arthropod community  
 419 sample DNA extraction submodule.

420

421 **Table 4.** Summary of key guidelines and recommendations proposed within the *3.1 Arthropod*  
 422 *community sample DNA extraction submodule*.

| <b>3.1 Arthropod community sample DNA extraction submodule</b> |                                                                                                                         |
|----------------------------------------------------------------|-------------------------------------------------------------------------------------------------------------------------|
| Digestion                                                      | No physical homogenisation step<br>High volumes of digestion buffer<br>Long digestion (shaking)                         |
| Purification                                                   | 200µl of digestion buffer<br>Qiagen DNeasy Blood & Tissue type<br>Negative controls and technical extraction replicates |
| Purified DNA storage                                           | Biobanking of DNA aliquots<br>-80°, -20° non-defrosting freezers                                                        |

423

#### 424 **4. Amplification, library preparation and sequencing step**

425 There is a clear trend toward the use of the *Cytochrome c oxidase* subunit I barcode region (COI  
 426 barcode) for wocDNA metabarcoding of arthropods (e.g. [37,40,83,89–92]). This can be largely  
 427 attributed to: (i) the good performance of different COI primers for arthropod community samples;  
 428 (ii) the availability of large COI barcode reference databases; (iii) sufficient variation to typically  
 429 allow taxonomic assignment at the species level, and; (iv) the potential to identify and remove  
 430 sequencing errors and spurious sequence assemblies by bioinformatic processing based on the  
 431 predicted variation in protein- coding regions and the limited expected length variation within the

432 COI barcode [89]. Multiple primer sets have been demonstrated to efficiently characterise  
433 arthropod community samples, particularly those incorporating degenerate nucleotide positions  
434 (i.e. positions that allow for the binding of more than one nucleotide) (see Figure 2 in Elbrecht et  
435 al., [37]), with a trend toward using the second half (3') of the COI barcode for metabarcoding  
436 studies (e.g. [40,93]). The BF3 fragment (418 bp) provides better taxonomic resolution than other  
437 overlapping fragments. Furthermore, primers within this region are also unaffected by slippage,  
438 and provide maximum overlap across already published studies [37]. Given these considerations,  
439 choosing primers of demonstrated efficiency within the BF3 region (BF3 + BF2 or III\_B\_F + Fol-  
440 degen-rev, among others (see [37])), or that overlap substantially with it, offer high potential for  
441 harmonising across independent studies.

442 PCR conditions are strongly dependent on selected primers, but also on sample  
443 composition and polymerase used. Ideally, PCR annealing temperatures and cycle numbers should  
444 be qPCR-optimized [94]. However, in the absence of such optimization, steps can be taken to  
445 reduce unneeded variability across studies. The number of PCR cycles should be maintained at or  
446 below 30 cycles if possible, to limit the formation of intra-sample chimeras ([95], reviewed in [5]).  
447 Serial dilution is a beneficial strategy, as DNA concentration from arthropod community samples,  
448 together with PCR inhibitors can be high, potential inhibitors can be effectively diluted out (e.g.,  
449 [96]). Comparisons of polymerase performance for metabarcoding [97] has revealed that  
450 polymerase choice impacts read abundance, but not occurrence. Among six commercially  
451 available polymerases tested, Qiagen Multiplex Master Mix has been shown to provide the most  
452 accurate estimates of relative abundance, but also generated the highest error rate [97]. While high-  
453 fidelity DNA polymerases can reduce PCR error rates [97,98], their proofreading activity (3'→5'  
454 exonuclease activity) can increase the rate of chimera formation [99,100]. PCR volume does not  
455 appear to be an important consideration for harmonisation as it has been reported that it does not

456 influence downstream results, but provides opportunity for cost savings via PCR miniaturisation  
457 (lower cost from reduced quantities of reaction components, [101], Table 5).

458         Performing PCR replicates and pooling for library preparation or sequencing is a well-  
459 established standard in the metabarcoding literature, particularly for arthropod community  
460 samples, with strong recommendations for a minimum pooling of three PCR replicates [102,103].  
461 The use of multiple PCR replicates per sample to be individually sequenced (technical replication)  
462 is less common, but their importance has been highlighted. Together with PCR negative controls,  
463 technical PCR replicates can provide important quality control for the removal of PCR and  
464 sequencing artefacts [87,94,104]. Thus, negative controls and technical replication within  
465 individual sequencing runs should be considered essential practice to identify potential biases and  
466 errors from (i) cross-contamination, (ii) tag-jumping events [105] and (iii) false-negative detection.  
467 Given the high potential for cross contamination within the PCR step, rigorous measures should  
468 be taken to minimise this risk (e.g. using filter tips, robotic platforms for plate aliquoting). Cross-  
469 contamination can be detected and filtered out by including technical replicates, together with  
470 positive and negative controls randomly distributed among different plates to bioinformatically  
471 curate data, reducing problems associated with tag switching and/or cross-contamination [106].  
472 These should be included in the laboratory and sequencing workflow (e.g. [107]). An important  
473 measure that enables one to filter out potential contamination during data processing is to use  
474 different nucleotide tag and/or library index combinations for individual PCR replicates within  
475 samples, as this will allow for restrictive sequence processing across each replicate [87,104].  
476 Similarly, the number of reads assigned to a given tag/library index combination that were not  
477 used in the study can provide an estimation of the contamination rate, and thus a minimum OTU  
478 relative abundance that should be considered as reliable [108]. Mock communities have been  
479 investigated as positive controls for estimating recovery bias, and the use of synthetic/exogenous  
480 internal standards has also been explored to estimate absolute abundance from metabarcode data

481 [10,109,110]. In the context of harmonisation across studies, universal positive controls harbour  
482 much potential for inter-calibration. This has yet to be developed and tested, but could be the basis  
483 for further improvement within this submodule.

484 Library preparation involves the addition of sample-specific nucleotide identifiers to  
485 amplicons and nucleotide tails for sequencing, for which there is considerable heterogeneity in the  
486 arthropod wocDNA metabarcoding literature. In their recent review, Bohmann et al., [106]  
487 identified and reviewed three main approaches to achieve sample-specific labelling and library  
488 preparation in metabarcoding studies. These include: (i) a one-step PCR approach in which sample  
489 DNA extracts are amplified, tagged and built into sequence libraries in a single PCR reaction with  
490 fusion primers, then pooled and sequenced; (ii) a two-step PCR, in which sample DNA extracts  
491 are PCR-amplified with two primer sets: a first PCR with metabarcoding primers carrying the 5'  
492 sequence overhangs and no nucleotide tags, and a second PCR using sequence overhangs, allowing  
493 the amplicons to be indexed (i5 and i7 indexes), and; (iii) a tagged PCR approach, in which DNA  
494 extracts are PCR amplified with metabarcoding primers that carry 5' nucleotide tags, individually  
495 tagged PCR products are then pooled, and PCR-based or ligation-based library preparation is  
496 performed for pools of 5' tagged amplicons.

497 All three labelling strategies have been used for arthropod wocDNA metabarcoding (e.g.  
498 [70,94,111]). The two-step approach, which is based on the Illumina 16S rRNA protocol,  
499 originally developed for microbiome studies, appears to be more commonly used. Tests comparing  
500 consistency and taxon detection efficiency between one step and two step PCR protocols (in this  
501 case implementing TrueSeq Nano over first untagged PCR) using mock arthropod samples reveal  
502 better performance with the two step protocol [26]. Ligation-based tagged PCR library  
503 preparations have been advocated, to avoid false assignment of sequences to samples by tag  
504 jumping [94,112], a recognised problem within the PCR-based tagged approach [105,106].  
505 However, no study has yet compared performance between two-step and ligation-based tagged

506 PCR. Between these two, the two-step approach is the more frequently used for arthropod  
 507 metabarcoding, and thus provides a suitable approach to minimise heterogeneity across studies  
 508 (Table 5).

509 The sequencing depth needed to recover all taxa is strongly dependent on the diversity and  
 510 complexity of a given sample. A sequencing depth of  $60,000 \pm 55,000$  reads per amplicon per  
 511 sample is commonly reported [113]. Increasing sequencing depth can increase the detection rate  
 512 of low-abundance taxa and reduce the impacts of differential processing protocols on perceived  
 513 diversity [40]. However, increased sequencing depth increases the cost by sample (see Table 2 in  
 514 Piper et al., [7] for a summary of the costs (2019) and Gb output for each platform), and inherently  
 515 increases the detection of artefactual sequences, requiring additional procedures for their removal  
 516 [5,80,104]. Distinguishing between sufficient or insufficient sequencing depth can be controlled  
 517 for by evaluating replicability [40], or by taxa recovery graphs on mock or composition controlled  
 518 communities of comparable nature [114]. The choice of sequencing platform also has potential to  
 519 generate variation among data sets. This variation appears to be limited across currently popular  
 520 platforms, such as Illumina MiSeq, Ion Torrent PGM and Ion Torrent S5 [40]. However, as future  
 521 sequencing platforms may present greater variation, it is important to report such details (e.g.  
 522 sequencing platform, read length). See Table 5 for key guidelines and recommendations for the  
 523 arthropod community sample DNA amplification, library preparation and sequencing submodule.

524

525 **Table 5.** Summary of key guidelines and recommendations proposed within the *4.1 Arthropod*  
 526 *community sample DNA amplification, library preparation and sequencing submodule*.

| <b>4.1 Arthropod community sample DNA amplification, library preparation and sequencing submodule</b> |                                                                                                           |
|-------------------------------------------------------------------------------------------------------|-----------------------------------------------------------------------------------------------------------|
| Target DNA fragments and primers                                                                      | COI locus<br>Second half (3') of the COI barcode fragment<br>Degenerate primers (see Elbrech et al. 2019) |



|                     |                                                                                                                                                                                                                                  |
|---------------------|----------------------------------------------------------------------------------------------------------------------------------------------------------------------------------------------------------------------------------|
| PCR conditions      | Minimize number of PCR cycles<br>Dilution of DNA extract<br>Non-proofreading Taq<br>PCR replicates (3), ideally individually labelled<br>Negative controls<br>Technical PCR replication<br>Cross-contamination control practices |
| Library preparation | Two-step protocol                                                                                                                                                                                                                |

527

528 **5. Metadata and DNA sequence sharing and storage step**

529 Metadata associated with the different steps of generating metabarcode data should be reported  
530 with DNA sequence data to enhance long term reuse value (see [115]). The GEOME (Genomic  
531 Observatories Metadatabase) initiative [15,16] offers a very useful platform, facilitating findable,  
532 accessible, interoperable and reusable data archival practices (i.e. FAIR principles).  
533 Interoperability is central to GEOME, as metadata follow controlled vocabularies consistent with  
534 DarwinCore and MIxS standards [116,117] and new records on GEOME are incorporated into the  
535 Global Biodiversity Information Facility, GBIF (<https://www.gbif.org/>). A customizable but  
536 standard-compliant single spreadsheet for metainformation, including: (i) the reference to the  
537 submodules implemented within each data acquisition steps (e.g. 1.2 sample acquisition  
538 submodule, 2.1 sample processing submodule, etc), and; (ii) all key information highlighted within  
539 each of the submodules, will facilitate downstream comparison among data sets. The metadata  
540 spreadsheet for the terrestrial arthropod module (GEOME spreadsheet) can be additionally  
541 included as supplementary publication material.

542 Finally, GEOME also facilitates DNA data sharing through the deposition of raw genetic  
543 data to the Sequence Read Archive (SRA, [www.ncbi.nlm.nih.gov/sra](http://www.ncbi.nlm.nih.gov/sra)), while maintaining  
544 persistent links to standard compliant metadata held in the GEOME database. SRA is thus an ideal  
545 platform for the storage of demultiplexed HTS files. Given the continuous development and  
546 improvement of bioinformatic tools for HTS data analysis, public archiving of raw DNA data is

547 important to facilitate future synthetic analysis across historical data sets. See Table 6 for key  
548 guidelines and recommendations of the arthropod community sample metadata and DNA sequence  
549 sharing and storage submodule.

550

551 **Table 6.** Summary of key guidelines and recommendations proposed within the *5.1 Arthropod*  
552 *community sample Metadata and DNA sequence sharing and storage submodule.*

| <b>5.1 Arthropod community sample Metadata and DNA sequence sharing and storage submodule</b> |                                                                                                  |
|-----------------------------------------------------------------------------------------------|--------------------------------------------------------------------------------------------------|
| Metadata                                                                                      | GeOME metadata submission<br>GeOME spreadsheet with the key information of the modules performed |
| DNA sequences                                                                                 | Raw data<br>SRA                                                                                  |

553

## 554 **Conclusions**

555 Whole organism community DNA metabarcoding is emerging as a powerful tool to characterise  
556 and compare arthropod communities, from the scale of local community composition through to  
557 global comparative analyses. For this potential to be fully realised, comparability across data sets  
558 generated by independent research groups is a fundamental prerequisite. There are several  
559 challenges to achieve this. First, as is the case for many new fields, early development has led to  
560 different strategies and tools, among which some will facilitate data comparability, while others  
561 will not. Here we have addressed this issue by suggesting a modular framework that seeks to  
562 reduce redundant efforts and improve comparability across studies by harmonisation of common  
563 practice across different research initiatives, where that practice demonstrates utility. We have  
564 illustrated this framework with recommendations for a module for the characterisation of terrestrial  
565 arthropods. A second challenge is that canalisation of different practises to optimise comparability  
566 at the community level may, inadvertently, limit flexibility at the scale of individual studies. While

567 this is to some extent unavoidable, the flexible structure we presented here seeks to broaden the  
568 applicability of a modular framework within the wocDNA metabarcoding community. Finally,  
569 unless appropriate data and metadata are provided for a given wocDNA metabarcode study, the  
570 opportunities for integrative analyses across historical data sets are likely to be limited. We address  
571 this challenge by advocating good reporting practice, and highlight that the submodule structure  
572 provides a framework for the incorporation of new advances as they emerge within the field of  
573 metabarcoding. We advocate the adoption and development of the terrestrial arthropod module  
574 that we propose here, as an important step toward harmonisation of metabarcode data. We further  
575 encourage the development of additional submodules for the terrestrial arthropod module (e.g. soil  
576 mesoarthropod sample acquisition, pan trapping for pollinator sample acquisition), as well as  
577 modules for other biodiversity fractions that are appropriate targets for wocDNA metabarcoding.

578

## 579 **Declarations:**

## 580 **Data Availability**

581 Not applicable

## 582 **Competing interests**

583 A.P.V. is a co- founder and scientific advisor of NatureMetrics, a private company providing  
584 commercial services in DNA- based monitoring. The authors declare that they have no other  
585 conflicts of interest.

## 586 **Funding**

587 The working group “Toward harmonisation for the generation of metabarcoding data: Soil  
588 Biodiversity and Terrestrial Arthropod modules” held in November 2020 (online) was organized  
589 by the iBioGen project, which has received funding from the European Union’s Horizon 2020  
590 research and innovation programme under grant agreement No. 810729. PA was funded through  
591 a Junior Leader Fellowship (LCF/BQ/PR21/11840006) by “la Caixa” Foundation (ID 100010434)

592 and the European Union’s Horizon 2020 research and innovation program under the Marie  
593 Skłodowska-Curie grant agreement No847648.

#### 594 **Authors' contributions**

595 P.A. and B.C.E. conceptualized the manuscript. All authors contributed to the ideas and discussion  
596 of this review. P.A. and B.C.E. coordinated the working group meetings and led the writing with  
597 contributions from all authors. All authors read and approved the final manuscript.

#### 598 **Acknowledgements**

599 Not applicable

600

#### 601 **Figure legends**

602

603 **Figure 1. A harmonised framework with a “modular” structure for metazoan**  
604 **metabarcoding.** Schematic representation of the modular structure proposed for building a  
605 harmonised framework for the generation of metabarcode data for different fractions of terrestrial  
606 animals. Different fractions of terrestrial animal diversity are at the core of each “module” (red  
607 rectangle, e.g. the terrestrial arthropods module) and within such a framework, best practices and  
608 harmonised protocols are developed as submodules (black blocks). Submodules within each  
609 module serve as the fundamental building blocks that provide guidelines and recommendations  
610 for the five, well-defined steps for generating metabarcode data (left panel, rows 1 to 5). Within  
611 this framework, tailored data generation pipelines can be configured within a module, drawn from  
612 the set of alternative submodules.

613

#### 614 **References**

615 1. Ji Y, Ashton L, Pedley SM, Edwards DP, Tang Y, Nakamura A, et al.. Reliable, verifiable and  
616 efficient monitoring of biodiversity via metabarcoding. *Ecol Lett.* 2013; doi: 10.1111/ele.12162.

- 617 2. Porter TM, Hajibabaei M. Scaling up: A guide to high-throughput genomic approaches for  
618 biodiversity analysis. *Mol Ecol.* 2018; doi: 10.1111/mec.14478.
- 619 3. Bohan DA, Vacher C, Tamaddoni-Nezhad A, Raybould A, Dumbrell AJ, Woodward G. Next-  
620 Generation Global Biomonitoring: Large-scale, Automated Reconstruction of Ecological  
621 Networks. *Trends Ecol Evol.* 2017; doi: 10.1016/j.tree.2017.03.001.
- 622 4. Bush A, Sollmann R, Wilting A, Bohmann K, Cole B, Balzter H, et al.. Connecting Earth  
623 observation to high-throughput biodiversity data. *Nat Ecol Evol.* Macmillan Publishers Limited;  
624 2017; doi: 10.1038/s41559-017-0176.
- 625 5. Taberlet P, Bonin A, Zinger L, Coissac E. Environmental DNA for biodiversity research and  
626 monitoring. *Environ. DNA Biodivers. Res. Monit.* Oxford: Oxford University Press;
- 627 6. Bush A, Catullo R, Mokany K, Harwood T, Hoskins AJ, Ferrier S. Incorporating existing  
628 thermal tolerance into projections of compositional turnover under climate change. *Glob Ecol*  
629 *Biogeogr.* 2019; doi: 10.1111/geb.12898.
- 630 7. Piper AM, Batovska J, Cogan NOI, Weiss J, Cunningham JP, Rodoni BC, et al.. Prospects and  
631 challenges of implementing DNA metabarcoding for high-throughput insect surveillance.  
632 *Gigascience.* Oxford University Press; 2019; doi: 10.1093/gigascience/giz092.
- 633 8. Gilbert JA, Jansson JK, Knight R. The Earth Microbiome project: Successes and aspirations.  
634 *BMC Biol.* 2014; doi: 10.1186/s12915-014-0069-1.
- 635 9. Gilbert JA, Meyer F, Antonopoulos D, Balaji P, Brown CT, Brown CT, et al.. Meeting  
636 Report: The Terabase Metagenomics Workshop and the Vision of an Earth Microbiome Project.  
637 *Stand Genomic Sci.* 2010; doi: 10.4056/sigs.1433550.
- 638 10. Ovaskainen O, Abrego N, Somervuo P, Palorinne I, Hardwick B, Pitkänen JM, et al..  
639 Monitoring Fungal Communities With the Global Spore Sampling Project. *Front Ecol Evol.*  
640 2020; doi: 10.3389/fevo.2019.00511.
- 641 11. Davies N, Meyer C, Gilbert JA, Amaral-Zettler L, Deck J, Bcak M, et al.. A call for an

642 international network of genomic observatories (GOs). *Gigascience*. 2012; doi: 10.1186/2047-  
643 217X -1-5.

644 12. Davies N, Field D, Amaral-Zettler L, Clark MS, Deck J, Drummond A, et al.. The founding  
645 charter of the Genomic Observatories Network. *Gigascience*. 2014; doi: 10.1186/2047-217X-3-  
646 2.

647 13. Arribas P, Andújar C, Bidartondo MI, Bohmann K, Coissac E, Creer S, et al.. Connecting  
648 high-throughput biodiversity inventories – opportunities for a site-based genomic framework for  
649 global integration and synthesis. *Mol Ecol*. 30:1120–352021;

650 14. Guralnick R, Walls R, Jetz W. Humboldt Core – toward a standardized capture of biological  
651 inventories for biodiversity monitoring, modeling and assessment. *Ecography (Cop)*. 2018; doi:  
652 10.1111/ecog.02942.

653 15. Deck J, Gaither MR, Ewing R, Bird CE, Davies N, Meyer C, et al.. The Genomic  
654 Observatories Metadatabase (GeOMe): A new repository for field and sampling event metadata  
655 associated with genetic samples. *PLoS Biol*. 2017; doi: 10.1371/journal.pbio.2002925.

656 16. Riginos C, Crandall ED, Liggins L, Gaither MR, Ewing RB, Meyer C, et al.. Building a  
657 global genomics observatory: Using GEOME (the Genomic Observatories Metadatabase) to  
658 expedite and improve deposition and retrieval of genetic data and metadata for biodiversity  
659 research. *Mol Ecol Resour*. 2020; doi: 10.1111/1755-0998.13269.

660 17. Creedy TJ, Andújar C, Meramveliotakis E, Noguerales V, Overcast I, Papadopoulou A, et  
661 al.. Coming of age for COI metabarcoding of whole organism community DNA: towards  
662 bioinformatic harmonisation. *Mol Ecol Resour*. 2022; doi: 10.1111/1755-0998.13502.

663 18. Caporaso JG, Paszkiewicz K, Field D, Knight R, Gilbert JA. The Western English Channel  
664 contains a persistent microbial seed bank. *ISME J*. Nature Publishing Group; 2012; doi:  
665 10.1038/ismej.2011.162.

666 19. Marotz C, Amir A, Humphrey G, Gaffney J, Gogul G, Knight R. DNA extraction for

667 streamlined metagenomics of diverse environmental samples. *Biotechniques*. 2017; doi:  
668 10.2144/000114559.

669 20. Alberti A. to metazoan marine plankton nucleotide sequences from the Tara Oceans  
670 expedition. *Sci Data*. 4:1700932017;

671 21. Gorsky G, Bourdin G, Lombard F, Pedrotti ML, Audrain S, Bin N, et al.. Expanding Tara  
672 Oceans Protocols for Underway, Ecosystemic Sampling of the Ocean-Atmosphere Interface  
673 During Tara Pacific Expedition (2016–2018). *Front Mar Sci*. 2019; doi:  
674 10.3389/fmars.2019.00750.

675 22. Kopf A. The ocean sampling day consortium. *Gigascience*. 2015; doi: 10.1186/s13742-015-  
676 0065-6.

677 23. Dickie IA, Boyer S, Buckley HL, Duncan RP, Gardner PP, Hogg ID, et al.. Towards robust  
678 and repeatable sampling methods in eDNA based studies. *Mol Ecol Resour*. 2018; doi:  
679 10.1111/1755-0998.12907.

680 24. Canonico G, Buttigieg PL, Montes E, Muller-Karger FE, Stepien C, Wright D, et al.. Global  
681 observational needs and resources for marine biodiversity. *Front Mar Sci*. 2019; doi:  
682 10.3389/fmars.2019.00367.

683 25. Murray DC, Coghlan ML, Bunce M. From benchtop to desktop: Important considerations  
684 when designing amplicon sequencing workflows. *PLoS One*. 2015; doi:  
685 10.1371/journal.pone.0124671.

686 26. Zizka VMA, Elbrecht V, Macher JN, Leese F. Assessing the influence of sample tagging and  
687 library preparation on DNA metabarcoding. *Mol Ecol Resour*. 2019; doi: 10.1111/1755-  
688 0998.13018.

689 27. Blackman RC, Mächler E, Altermatt F, Arnold A, Beja P, Boets P, et al.. Advancing the use  
690 of molecular methods for routine freshwater macroinvertebrate biomonitoring – the need for  
691 calibration experiments. *Metabarcoding and Metagenomics*. 2019; doi: 10.3897/mbmg.3.34735.

- 692 28. Zaiko A, Greenfield P, Abbott C, von Ammon U, Bilewitch J, Bunce M, et al.. Towards  
693 reproducible metabarcoding data: Lessons from an international cross-laboratory experiment.  
694 *Mol Ecol Resour.* 2021; doi: 10.1111/1755-0998.13485.
- 695 29. Philippot L, Ritz K, Pandard P, Hallin S, Martin-Laurent F. Standardisation of methods in  
696 soil microbiology: Progress and challenges. *FEMS Microbiol Ecol.* 2012; doi: 10.1111/j.1574-  
697 6941.2012.01436.x.
- 698 30. Stork NE, McBroom J, Gely C, Hamilton AJ. New approaches narrow global species  
699 estimates for beetles, insects, and terrestrial arthropods. *Proc Natl Acad Sci.* 2015; doi:  
700 10.1073/pnas.1502408112.
- 701 31. Goulson D. The insect apocalypse, and why it matters. *Curr Biol.* Elsevier; 2019; doi:  
702 10.1016/j.cub.2019.06.069.
- 703 32. Harvey JA, Heinen R, Armbrrecht I, Basset Y, Baxter-Gilbert JH, Bezemer TM, et al..  
704 International scientists formulate a roadmap for insect conservation and recovery. *Nat Ecol Evol.*  
705 2020; doi: 10.1038/s41559-019-1079-8.
- 706 33. Seebens H, Blackburn TM, Dyer EE, Genovesi P, Hulme PE, Jeschke JM, et al.. Global rise  
707 in emerging alien species results from increased accessibility of new source pools. *Proc Natl*  
708 *Acad Sci U S A.* 2018; doi: 10.1073/pnas.1719429115.
- 709 34. Liu M, Clarke LJJ, Baker SC, Jordan GJG, Burrige CPCP. A practical guide to DNA  
710 metabarcoding for entomological ecologists. *Ecol Entomol.* 2019; doi: 10.1111/een.12831.
- 711 35. Yu DW, Ji Y, Emerson BC, Wang X, Ye C, Yang C, et al.. Biodiversity soup: metabarcoding  
712 of arthropods for rapid biodiversity assessment and biomonitoring. *Methods Ecol Evol.* 2012;  
713 doi: 10.1111/j.2041-210X.2012.00198.x.
- 714 36. Andújar C, Arribas P, Gray C, Bruce C, Woodward G, Yu DW, et al.. Metabarcoding of  
715 freshwater invertebrates to detect the effects of a pesticide spill. *Mol Ecol.* 2018; doi:  
716 10.1111/mec.14410.



- 717 37. Elbrecht V, Braukmann TW, Ivanova N V, Prosser SW, Hajibabaei M, Wright M, et al..  
718 Validation of COI metabarcoding primers for terrestrial arthropods. *PeerJ*. PeerJ Inc.; 2019; doi:  
719 10.7287/peerj.preprints.27801v1.
- 720 38. Krehenwinkel H, Fong M, Kennedy S, Huang EG, Noriyuki S, Cayetano L, et al.. The effect  
721 of DNA degradation bias in passive sampling devices on metabarcoding studies of arthropod  
722 communities and their associated microbiota. *PLoS One*. 2018; doi:  
723 10.1371/journal.pone.0189188.
- 724 39. Krehenwinkel H, Kennedy SR, Rueda A, Lam A, Gillespie RG. Scaling up DNA barcoding  
725 – Primer sets for simple and cost efficient arthropod systematics by multiplex PCR and Illumina  
726 amplicon sequencing. *Methods Ecol Evol*. 2018; doi: 10.1111/2041-210X.13064.
- 727 40. Braukmann TWA, Ivanova N V., Prosser SWJ, Elbrecht V, Steinke D, Ratnasingham S, et  
728 al.. Metabarcoding a diverse arthropod mock community. *Mol Ecol Resour*. 2019; doi:  
729 10.1111/1755-0998.13008.
- 730 41. D’Souza ML, van der Bank M, Shongwe Z, Rattray RD, Stewart R, van Rooyen J, et al..  
731 Biodiversity baselines: Tracking insects in Kruger National Park with DNA barcodes. *Biol*  
732 *Conserv*. 2021; doi: 10.1016/j.biocon.2021.109034.
- 733 42. Basset Y, Springate ND, Aberlenc HP, Delvare G. A review of methods for sampling  
734 arthropods in tree canopies. In: Strok NE, Adis J, Didham RK, editors. *Canopy Arthropods*.  
735 London: Chapman and Hall;
- 736 43. Montgomery GA, Belitz MW, Guralnick RP, Tingley MW. Standards and Best Practices for  
737 Monitoring and Benchmarking Insects. *Front Ecol Evol*. 2021; doi: 10.3389/fevo.2020.579193.
- 738 44. Geiger MF, Moriniere J, Hausmann A, Haszprunar G, Wägele W, Hebert PDN, et al..  
739 Testing the Global Malaise Trap Program - How well does the current barcode reference library  
740 identify flying insects in Germany? *Biodivers Data J*. 2016; doi: 10.3897/BDJ.4.e10671.
- 741 45. Marquina D, Esparza- Salas R, Roslin T, Ronquist F. Establishing arthropod community

742 composition using metabarcoding: Surprising inconsistencies between soil samples and  
743 preservative ethanol and homogenate from Malaise trap catches. *Mol Ecol Resour.* 2019; doi:  
744 10.1111/1755-0998.13071.

745 46. Barsoum N, Bruce C, Forster J, Ji YQ, Yu DW. The devil is in the detail: Metabarcoding of  
746 arthropods provides a sensitive measure of biodiversity response to forest stand composition  
747 compared with surrogate measures of biodiversity. *Ecol Indic.* Elsevier; 2019; doi:  
748 10.1016/j.ecolind.2019.01.023.

749 47. Ritter CD, Häggqvist S, Karlsson D, Sääksjärvi IE, Muasya AM, Nilsson RH, et al..  
750 Biodiversity assessments in the 21st century: The potential of insect traps to complement  
751 environmental samples for estimating eukaryotic and prokaryotic diversity using high-  
752 throughput DNA metabarcoding. *Genome.* 2019; doi: 10.1139/gen-2018-0096.

753 48. Watts C, Dopheide A, Holdaway R, Davis C, Wood J, Thornburrow D, et al.. DNA  
754 metabarcoding as a tool for invertebrate community monitoring: a case study comparison with  
755 conventional techniques. *Austral Entomol.* 2019; doi: 10.1111/aen.12384.

756 49. Hausmann A, Segerer AH, Greifenstein T, Knubben J, Morinière J, Bozicevic V, et al..  
757 Toward a standardized quantitative and qualitative insect monitoring scheme. *Ecol Evol.* 2020;  
758 doi: 10.1002/ece3.6166.

759 50. DeWaard JR, Levesque-Beaudin V, DeWaard SL, Ivanova N V., McKeown JTA, Miskie R,  
760 et al.. Expedited assessment of terrestrial arthropod diversity by coupling Malaise traps with  
761 DNA barcoding. *Genome.* 2019; doi: 10.1139/gen-2018-0093.

762 51. Malaise R. A new insect-trap. *Entomol Tidskr.* 58:148–601937;

763 52. Schmidt O, Schmidt S, Häuser CL, Hausmann A, Van Vu L. Using Malaise traps for  
764 collecting Lepidoptera (Insecta), with notes on the preparation of Macrolepidoptera from  
765 ethanol. *Biodivers Data J.* 2019; doi: 10.3897/BDJ.7.e32192.

766 53. Karlsson D, Forshage M, Holston K, Ronquist F. The data of the Swedish Malaise Trap

767 Project, a countrywide inventory of Sweden's insect fauna. *Biodivers Data J.* 2020; doi:  
768 10.3897/bdj.8.e56286.

769 54. Hoekman D, Levan KE, Ball GE, Browne RA, Davidson RL, Erwin TL, et al.. Design for  
770 ground beetle abundance and diversity sampling within the National Ecological Observatory  
771 Network. *Ecosphere.* 2017; doi: 10.1002/ecs2.1744.

772 55. Nakamura S, Tamura S, Taki H, Shoda-Kagaya E. Propylene glycol: a promising  
773 preservative for insects, comparable to ethanol, from trapping to DNA analysis. *Entomol Exp*  
774 *Appl.* 2020; doi: 10.1111/eea.12876.

775 56. Steinke D, Braukmann TWA, Manerus L, Woodhouse A, Elbrecht V. Effects of Malaise trap  
776 spacing on species richness and composition of terrestrial arthropod bulk samples.  
777 *Metabarcoding and Metagenomics.* 2021; doi: 10.3897/MBMG.5.59201.

778 57. Szewczyk TM, McCain CM. Disentangling elevational richness: a multi-scale hierarchical  
779 Bayesian occupancy model of Colorado ant communities. *Ecography (Cop).* 2019; doi:  
780 10.1111/ecog.04115.

781 58. Powney GD, Carvell C, Edwards M, Morris RKA, Roy HE, Woodcock BA, et al..  
782 Widespread losses of pollinating insects in Britain. *Nat Commun.* Springer US; 2019; doi:  
783 10.1038/s41467-019-08974-9.

784 59. Weißbecker C, Buscot F, Wubet T. Preservation of nucleic acids by freeze-drying for next  
785 generation sequencing analyses of soil microbial communities. *J Plant Ecol.* 2017; doi:  
786 10.1093/jpe/rtw042.

787 60. Marquina D, Buczek M, Ronquist F, Lukasik P. The effect of ethanol concentration on the  
788 morphological and molecular preservation of insects for biodiversity studies. *PeerJ.* 2021; doi:  
789 10.7717/peerj.10799.

790 61. Martoni F, Nogarotto E, Piper AM, Mann R, Valenzuela I, Eow L, et al.. Propylene Glycol  
791 and Non-Destructive DNA Extractions Enable Preservation and Isolation of Insect and Hosted

792 Bacterial DNA. *Agric.* 2021; doi: 10.3390/agriculture11010077.

793 62. de Kerdrel GA, Andersen JC, Kennedy SR, Gillespie R, Krehenwinkel H. Rapid and cost-  
794 effective generation of single specimen multilocus barcoding data from whole arthropod  
795 communities by multiple levels of multiplexing. *Sci Rep.* 2020; doi: 10.1038/s41598-019-54927-  
796 z.

797 63. Hertz M. Huomioita petokuoriaisten olinpaikoista. *Luonnon Yst.* 31:218–221927;

798 64. Brooks DR, Bajer JE, Clark SJ, Monteith DT, Andrews C, Corbett SJ, et al.. Large carabid  
799 beetle declines in a United Kingdom monitoring network increases evidence for a widespread  
800 loss in insect biodiversity. *J Appl Ecol.* 2012; doi: 10.1111/j.1365-2664.2012.02194.x.

801 65. Brown GR, Matthews IM. A review of extensive variation in the design of pitfall traps and a  
802 proposal for a standard pitfall trap design for monitoring ground-active arthropod biodiversity.  
803 *Ecol Evol.* 2016; doi: 10.1002/ece3.2176.

804 66. Ward DF, New TR, Yen AL. Effects of pitfall trap spacing on the abundance, richness and  
805 composition of invertebrate catches. *J Insect Conserv.* 2001; doi: 10.1023/A:1011317423622.

806 67. Hohbein RR, Conway CJ. Pitfall traps: A review of methods for estimating arthropod  
807 abundance. *Wildl Soc Bull.* 2018; doi: 10.1002/wsb.928.

808 68. Missa O, Basset Y, Alonso A, Miller SE, Curletti G, De Meyer M, et al.. Monitoring  
809 arthropods in a tropical landscape: Relative effects of sampling methods and habitat types on  
810 trap catches. *J Insect Conserv.* 2009; doi: 10.1007/s10841-007-9130-5.

811 69. Deagle BE, Thomas AC, McInnes JC, Clarke LJ, Vesterinen EJ, Clare EL, et al.. Counting  
812 with DNA in metabarcoding studies: How should we convert sequence reads to dietary data?  
813 *Mol Ecol.* 2019; doi: 10.1111/mec.14734.

814 70. Elbrecht V, Peinert B, Leese F. Sorting things out: Assessing effects of unequal specimen  
815 biomass on DNA metabarcoding. *Ecol Evol.* 2017; doi: 10.1002/ece3.3192.

816 71. Creedy TJ, Ng WS, Vogler AP. Toward accurate species-level metabarcoding of arthropod

817 communities from the tropical forest canopy. *Ecol Evol.* 2019; doi: 10.1002/ece3.4839.

818 72. Elbrecht V, Bourlat S, Hörren T, Lindner A, Mordente A, Noll N, et al.. Pooling size sorted  
819 malaise trap fractions to maximise taxon recovery with metabarcoding. *PeerJ.* 2021; doi:  
820 10.7717/peerj.12177.

821 73. Cardoso P, Leather SR. Predicting a global insect apocalypse. *Insect Conserv Divers.* 2019;  
822 doi: 10.1111/icad.12367.

823 74. Zinger L, Bonin A, Alsos IG, Bálint M, Bik H, Boyer F, et al.. DNA metabarcoding—Need  
824 for robust experimental designs to draw sound ecological conclusions. *Mol Ecol.* 2019; doi:  
825 10.1111/mec.15060.

826 75. Ärje J, Melvad C, Jeppesen MR, Madsen SA, Raitoharju J, Rasmussen MS, et al.. Automatic  
827 image-based identification and biomass estimation of invertebrates. *Methods Ecol Evol.* 2020;  
828 doi: 10.1111/2041-210X.13428.

829 76. Valan M, Makonyi K, Maki A, Vondráček D, Ronquist F. Automated taxonomic  
830 identification of insects with expert-level accuracy using effective feature transfer from  
831 convolutional networks. *Syst Biol.* 2019; doi: 10.1093/sysbio/syz014.

832 77. Valan M, Vondráček D, Ronquist F. Awakening a taxonomist’s third eye: exploring the  
833 utility of computer vision and deep learning in insect systematics. *Syst Entomol.* 2021; doi:  
834 10.1111/syen.12492.

835 78. Ronquist F, Forshage M, Häggqvist S, Karlsson D, Hovmöller R, Bergsten J, et al..  
836 Completing Linnaeus’s inventory of the Swedish insect fauna: Only 5,000 species left? *PLoS*  
837 *One.* 2020; doi: 10.1371/journal.pone.0228561.

838 79. deWaard JR, Ratnasingham S, Zakharov E V, Borisenko A V, Steinke D, Telfer AC, et al.. A  
839 reference library for the identification of Canadian invertebrates: 1.5 million DNA barcodes,  
840 voucher specimens, and genomic samples. *Sci Data.* 2019; doi: 10.1038/s41597-019-0320-2.

841 80. Andújar C, Creedy TJ, Arribas P, López H, Salces-Castellano A, Pérez-Delgado AJ, et al..

842 Validated removal of nuclear pseudogenes and sequencing artefacts from mitochondrial  
843 metabarcode data. *Mol Ecol Resour.* 2021; doi: 10.1111/1755-0998.13337.

844 81. Creedy TJTJ, Norman H, Tang CQCQ, Qing Chin K, Andujar C, Arribas P, et al.. A  
845 validated workflow for rapid taxonomic assignment and monitoring of a national fauna of bees  
846 (Apiformes) using high throughput DNA barcoding. *Mol Ecol Resour.* doi: 10.1111/1755-  
847 0998.13056.

848 82. Nielsen M, Gilbert MTP, Pape T, Bohmann K. A simplified DNA extraction protocol for  
849 unsorted bulk arthropod samples that maintains exoskeletal integrity. *Environ DNA.* 2019; doi:  
850 10.1002/edn3.16.

851 83. Arribas P, Andújar C, Hopkins K, Shepherd M, Vogler AP, Andújar C, et al.. Metabarcoding  
852 and mitochondrial metagenomics of endogean arthropods to unveil the mesofauna of the soil.  
853 *Methods Ecol Evol.* 2016; doi: 10.1111/2041-210X.12557.

854 84. Deiner K, Walser JC, Mächler E, Altermatt F. Choice of capture and extraction methods  
855 affect detection of freshwater biodiversity from environmental DNA. *Biol Conserv.* Elsevier Ltd;  
856 2015; doi: 10.1016/j.biocon.2014.11.018.

857 85. Majaneva M, Diserud OH, Eagle SHC, Hajibabaei M, Ekrem T. Choice of DNA extraction  
858 method affects DNA metabarcoding of unsorted invertebrate bulk samples. *Metabarcoding and*  
859 *Metagenomics.* 2018; doi: 10.3897/mbmg.2.26664.

860 86. Sellers GS, Di Muri C, Gómez A, Hänfling B. Mu-DNA: A modular universal DNA  
861 extraction method adaptable for a wide range of sample types. *Metabarcoding and*  
862 *Metagenomics.* 2018; doi: 10.3897/mbmg.2.24556.

863 87. Zinger L, Lionnet C, Benoiston A-S, Donald J, Mercier C, Boyer F. metabar : an R package  
864 for the evaluation and improvement of DNA metabarcoding data quality. *Methods Ecol Evol.*  
865 2021; doi: 10.1111/2041-210X.13552.

866 88. Jarman SN, Berry O, Bunce M. The value of environmental DNA biobanking for long-term

867 biomonitoring. *Nat Ecol Evol*. Springer US; 2018; doi: 10.1038/s41559-018-0614-3.

868 89. Andújar C, Arribas P, Yu DW, Vogler AP, Emerson BC. Why the COI barcode should be  
869 the community DNA metabarcode for the Metazoa. *Mol Ecol*. 2018; doi: 10.1111/mec.14844.

870 90. Beng KC, Tomlinson KW, Shen XH, Surget-Groba Y, Hughes AC, Corlett RT, et al.. The  
871 utility of DNA metabarcoding for studying the response of arthropod diversity and composition  
872 to land-use change in the tropics. *Sci Rep*. 2016; doi: 10.1038/srep24965.

873 91. Elbrecht V, Leese F, Nichols SJ. Validation and Development of COI Metabarcoding  
874 Primers for Freshwater Macroinvertebrate Bioassessment. *Front Environ Sci*. 2017; doi:  
875 10.3389/fenvs.2017.00011.

876 92. Leray M, Yang JY, Meyer CP, Mills SC, Agudelo N, Ranwez V, et al.. A new versatile  
877 primer set targeting a short fragment of the mitochondrial COI region for metabarcoding  
878 metazoan diversity: application for characterizing coral reef fish gut contents. *Front Zool*.  
879 *Frontiers in Zoology*; 2013; doi: 10.1186/1742-9994-10-34.

880 93. Arribas P, Andújar C, Salces-Castellano A, Emerson BC, Vogler AP. The limited spatial  
881 scale of dispersal in soil arthropods revealed with whole-community haplotype-level  
882 metabarcoding. *Mol Ecol*. 2021; doi: <https://doi.org/10.1111/mec.15591>.

883 94. Yang C, Bohmann K, Wang X, Cai W, Wales N, Ding Z, et al.. Biodiversity Soup II: A bulk-  
884 sample metabarcoding pipeline emphasizing error reduction. *Methods Ecol Evol*. 2021; doi:  
885 10.1111/2041-210X.13602.

886 95. Haas BJ, Gevers D, Earl AM, Feldgarden M, Ward D V., Giannoukos G, et al.. Chimeric  
887 16S rRNA sequence formation and detection in Sanger and 454-pyrosequenced PCR amplicons.  
888 *Genome Res*. 2011; doi: 10.1101/gr.112730.110.

889 96. Elbrecht V, Vamos EE, Steinke D, Leese F. Estimating intraspecific genetic diversity from  
890 community DNA metabarcoding data. *PeerJ*. 2018; doi: 10.7717/peerj.4644.

891 97. Nichols R V., Vollmers C, Newsom LA, Wang Y, Heintzman PD, Leighton M, et al..

892 Minimizing polymerase biases in metabarcoding. *Mol Ecol Resour.* 2018; doi: 10.1111/1755-  
893 0998.12895.

894 98. Sze MA, Schloss PD. The Impact of DNA Polymerase and Number of Rounds of  
895 Amplification in PCR on 16S rRNA Gene Sequence Data. *mSphere.* 2019; doi:  
896 10.1128/msphere.00163-19.

897 99. Ahn JH, Hong IP, Bok JI, Kim BY, Song J, Weon HY. Pyrosequencing analysis of the  
898 bacterial communities in the guts of honey bees *Apis cerana* and *Apis mellifera* in Korea. *J*  
899 *Microbiol.* 2012; doi: 10.1007/s12275-012-2188-0.

900 100. Gury J, Zinger L, Gielly L, Taberlet P, Geremia RA. Exonuclease activity of proofreading  
901 DNA polymerases is at the origin of artifacts in molecular profiling studies. *Electrophoresis.*  
902 2008; doi: 10.1002/elps.200700667.

903 101. Buchner D, Beermann AJ, Leese F, Weiss M. Cooking small and large portions of  
904 “biodiversity- soup”: Miniaturized DNA metabarcoding PCRs perform as good as large-  
905 volume PCRs. *Ecol Evol.* 2021; doi: 10.1002/ece3.7753.

906 102. Ficetola GF, Pansu J, Bonin A, Coissac E, Giguet-Covex C, De Barba M, et al.. Replication  
907 levels, false presences and the estimation of the presence/absence from eDNA metabarcoding  
908 data. *Mol Ecol Resour.* 2015; doi: 10.1111/1755-0998.12338.

909 103. Dopheide A, Xie D, Buckley TR, Drummond AJ, Newcomb RD. Impacts of DNA  
910 extraction and PCR on DNA metabarcoding estimates of soil biodiversity. *Methods Ecol Evol.*  
911 2019; doi: 10.1111/2041-210X.13086.

912 104. Alberdi A, Aizpurua O, Gilbert MTP, Bohmann K. Scrutinizing key steps for reliable  
913 metabarcoding of environmental samples. *Methods Ecol Evol.* 2018; doi: 10.1111/2041-  
914 210X.12849.

915 105. Schnell IB, Bohmann K, Gilbert MTP. Tag jumps illuminated - reducing sequence-to-  
916 sample misidentifications in metabarcoding studies. *Mol Ecol Resour.* 2015; doi: 10.1111/1755-



917 0998.12402.

918 106. Bohmann K, Elbrecht V, Carøe C, Bista I, Leese F, Bunce M, et al.. Strategies for sample  
919 labelling and library preparation in DNA metabarcoding studies. *Mol Ecol Resour.* 2021;

920 107. Bista I, Carvalho GR, Tang M, Walsh K, Zhou X, Hajibabaei M, et al.. Performance of  
921 amplicon and shotgun sequencing for accurate biomass estimation in invertebrate community  
922 samples. *Mol Ecol Resour.* 2018; doi: 10.1111/1755-0998.12888.

923 108. Esling P, Lejzerowicz F, Pawlowski J. Accurate multiplexing and filtering for high-  
924 throughput amplicon-sequencing. *Nucleic Acids Res.* 2015; doi: 10.1093/nar/gkv107.

925 109. Smets W, Leff JW, Bradford MA, McCulley RL, Lebeer S, Fierer N. A method for  
926 simultaneous measurement of soil bacterial abundances and community composition via 16S  
927 rRNA gene sequencing. *Soil Biol Biochem.* Elsevier Ltd; 2016; doi:  
928 10.1016/j.soilbio.2016.02.003.

929 110. Ushio M, Murakami H, Masuda R, Sado T, Miya M, Sakurai S, et al.. Quantitative  
930 monitoring of multispecies fish environmental DNA using high-throughput sequencing.  
931 *Metabarcoding and Metagenomics.* 2018; doi: 10.3897/mbmg.2.23297.

932 111. Elbrecht V, Leese F, Rockström J, Steffen W, Noone K, Persson A, et al.. Can DNA-Based  
933 Ecosystem Assessments Quantify Species Abundance? Testing Primer Bias and Biomass—  
934 Sequence Relationships with an Innovative Metabarcoding Protocol. *PLoS One.* 2015; doi:  
935 10.1371/journal.pone.0130324.

936 112. Carøe C, Bohmann K. Tagsteady: A metabarcoding library preparation protocol to avoid  
937 false assignment of sequences to samples. *Mol Ecol Resour.* 2020; doi: 10.1111/1755-  
938 0998.13227.

939 113. Singer GAC, Fahner NA, Barnes JG, McCarthy A, Hajibabaei M. Comprehensive  
940 biodiversity analysis via ultra-deep patterned flow cell technology: a case study of eDNA  
941 metabarcoding seawater. *Sci Rep.* 2019; doi: 10.1038/s41598-019-42455-9.

942 114. Hajibabaei M, Porter TM, Wright M, Rudar J. COI metabarcoding primer choice affects  
943 richness and recovery of indicator taxa in freshwater systems. *PLoS One*. 2019; doi:  
944 10.1371/journal.pone.0220953.

945 115. Tedersoo L, Ramirez KS, Nilsson RH, Kaljuvee A, Kõljalg U, Abarenkov K. Standardizing  
946 metadata and taxonomic identification in metabarcoding studies. *Gigascience*. 2015; doi:  
947 10.1186/s13742-015-0074-5.

948 116. Wieczorek J, Bloom D, Guralnick R, Blum S, Döring M, Giovanni R, et al.. Darwin core:  
949 An evolving community-developed biodiversity data standard. *PLoS One*. 2012; doi:  
950 10.1371/journal.pone.0029715.

951 117. Yilmaz P, Kottmann R, Field D, Knight R, Cole JR, Amaral-Zettler L, et al.. Minimum  
952 information about a marker gene sequence (MIMARKS) and minimum information about any  
953 (x) sequence (MIXS) specifications. *Nat Biotechnol*. 2011; doi: 10.1038/nbt.1823.

954

# MODULE 1

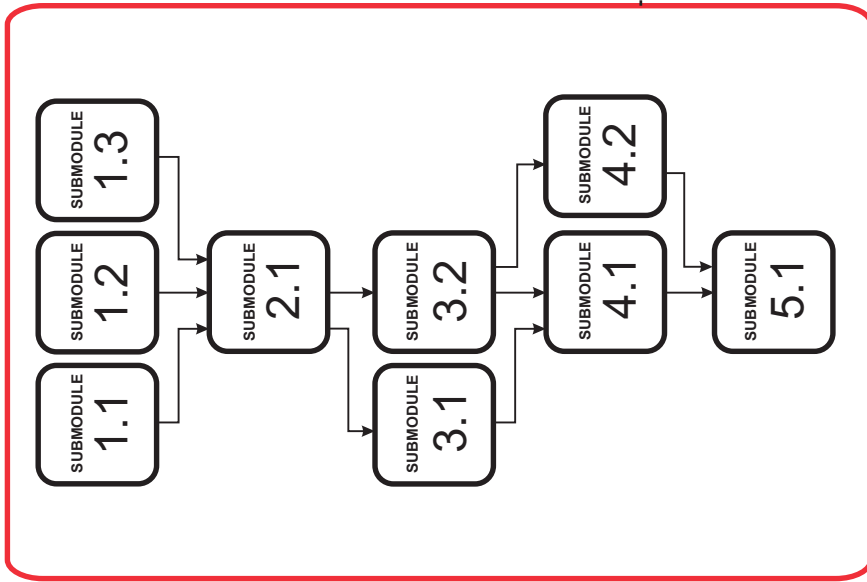

1 Sample acquisition

2 Sample processing

3 DNA extraction

4 Amplification, library preparation and sequencing

5 DNA sequence and metadata deposition

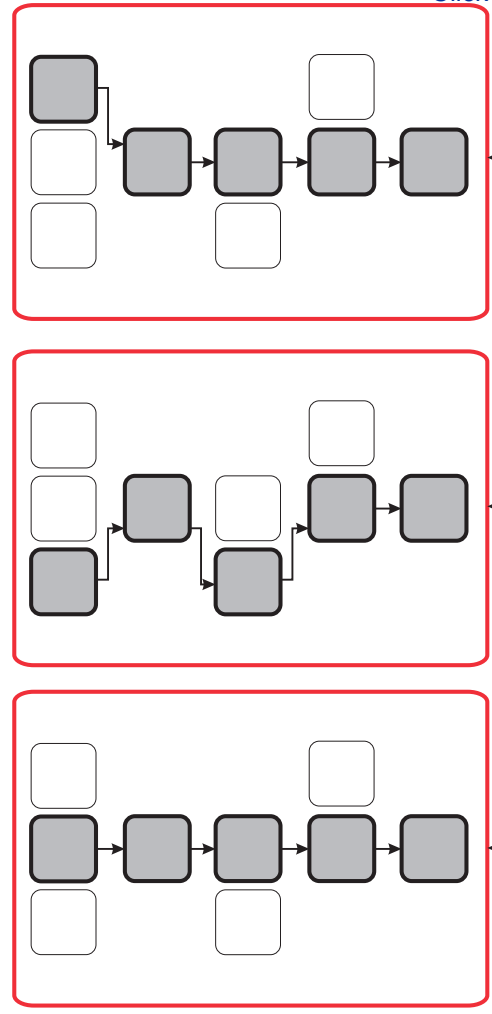

potential DATA GENERATION PIPELINES

Dear Editor,

Many thanks for your comments with respect to our manuscript entitled “*Toward global integration of biodiversity big data: a harmonised metabarcode data generation module for terrestrial arthropods*”. We are pleased that the editor and reviewers viewed the work timely and of general interest to the broad scientific audience of *GigaScience*. We found the comments helpful and interesting and have carefully read through and acted on all reviewer suggestions (all changes highlighted in the newly submitted version), and explain our responses, point-by-point, in this letter (text in blue preceded by ' >> ').

Many thanks for your time,

We look forward to hearing from you.

Yours sincerely,

Paula Arribas & Brent C. Emerson (on behalf of co-authors)

-----  
**Editor comments:**

Dear Dr Arribas,

Your manuscript "*Toward global integration of biodiversity big data: a harmonised metabarcode data generation module for terrestrial arthropods*" (Review Article, GIGA-D-21-00420) has been assessed by our reviewers. Based on these reports, and my own assessment as Editor, I am pleased to inform you that it is potentially acceptable for publication in *GigaScience*, once you have carried out some essential revisions suggested by our reviewers. Their reports are below. Please note, reviewer #2 requested a document with line numbers during review, and I added those to your word document and re-uploaded it to Editorial Manager - please download the version with line numbers from EM to see which lines the reviewer refers to.

>> Thank you very much for the overall positive evaluation of our manuscript. We have revised the text to incorporate the suggestions of the reviewers. We are very grateful for the time that they have dedicated to reviewing our work, and their suggestions have improved clarity and provide for a more polished manuscript. Please see below for details.

## **Reviewer reports:**

**Reviewer #1:** Comments to Authors (please, see pdf for a better format).

I found the manuscript "Toward global integration of biodiversity big data: a harmonised metabarcode data generation module for terrestrial arthropods" very interesting and useful.

I think that a review of the current metabarcoding methods and techniques is timely and the provided structure in modules seems to work well, adding a lot of value to the work. The suggested module framework can be very valuable, especially considering it leaves options for customization.

I personally think that the literature review is quite complete, and the information reported give the reader a good picture of the topic.

>> Thank you for your positive evaluation, and for the time you have dedicated improving the clarity of our manuscript, we appreciate it.

I have a few suggestions that I hope may help making the paper even clearer and more useful to the reader. For example, I think the structure of the paper should match the structure of the figure, with a clear subdivision in modules and submodules (i.e., chapters and subchapters). While it surely is not the ideal behaviour, we are all aware that many readers will probably skim through the article to the different modules they are interested on. A more defined chapter structure of the article will make it more useful to a wider audience.

>> We think that the limited way we integrated between the figure and text may have created some confusion, and thus we have clarified this aspect in the new version. Please see below the details in the specific comment.

The writing is clear, and the article is well-written. I hope the authors will forgive me if I spent a bit of time making (probably picky) changes to the wording, especially in the conclusion. This is only because I think the paper really has value and the conclusion will be one of the most-read parts of the article once published.

>> We don't think this is picky at all, and appreciate the time you have invested in our work. All the suggestions have been incorporated into the new version.

I have a few main comments and some minor changes (below), but I think the article should be accepted after their corrections.

Please, add continuous line numbers when resubmitting.

>> Done.

Main comments:

Module 1: Sample acquisition.

- At page 7, the authors start with the "Sample acquisition" chapter, which is their "Module 1" in the figure. The title of this chapter should be "Module 1: Sample acquisition". Here the reader, after a first introductory paragraph where a sample is defined (see next comment), should be able to find three subsections: submodule 1.1: malaise traps, submodule 1.2: pitfall traps. This proposed structure could also help readers focus on the part they are interested in. For example, if a researcher is using only pitfall traps, they will go directly to submodule 1.2. What about submodule 1.3? It appears in the figure but not in the text. If the figure is just an example of submodules that can be added, the authors should state that.

>> Thank you for pointing out this potential source of confusion. Please note that the section "Sample acquisition" does not correspond with Module 1 in Figure 1. We have clarified in the text and figure legend that Figure 1 is a schematic representation of the modular structure proposed for building a harmonised framework for the generation of metabarcode data for different fractions of terrestrial animals (modified text, lines 136). Our manuscript proposes this framework, and develops one such module: the terrestrial arthropods module, which focused on harmonisation for this biodiversity fraction.

The rationale for the structure of the terrestrial arthropod module text is that, once the justification of the general need for this module is developed in the text, we (i) review the existing literature pertaining to the five main steps (as subsections) and based on that, (ii) propose one or several submodules per step, providing a summary table for each submodule. We have reworded the text and headings (e.g. modified text, lines 136, 149, 186) to clarify this. We agree with the reviewer that many readers will probably skim through the article to the different submodules they are interested in, so thus we provide a summary table for each proposed submodule. So, for the first step (1. Sample acquisition step) of the terrestrial arthropod module we propose the 1.1 Malaise trapping sample

acquisition submodule (Table 1) and the 1.2 Pitfall trapping sample acquisition submodule (Table 2). Additional submodules can be further developed within this module (e.g. 1.3, 1.4...).

- This module start saying that it's important to have a "sample definition", and I totally agree. However, the authors do not provide one. It is true that a sample definition is strongly linked to the collection technique, but I think that we still require a sample definition, and I think the authors should be able to provide one. In my opinion, all the information necessary for a definition is in the text, it just need to be summarised. For example, a sample is composed by the arthropods, but also by their preservation, and the associated metadata. If any of these factors is missing, the sample is not fit for metabarcoding. It would be useful to know what else is really required for a sample to be defined as such. This sample definition should be after the first sentence and prior to the second one.

>> Please see the previous comment, and note that information regarding the sample definition for each submodule is summarized in the corresponding table for each (i.e. Table 1 for the 1.1 Malaise trapping sample acquisition submodule and Table 2 for the 1.2 Pitfall trapping sample acquisition submodule).

- After the first introductory aspects on definition of a sample, the authors cite the work of Montgomery and colleagues, where seven different collection methods are listed. The authors state that these methods provide "an appropriate platform from which to develop sample acquisition submodules". After reading this, I would have expected the authors to provide a submodule on EACH of these seven methods. Instead, only malaise traps and pitfall traps are presented. By doing this, the authors are either contradicting themselves and the work of Montgomery, or they are not clear on the reason they decide to report only two methods. Are the authors suggesting that, of the seven sampling techniques proposed, only malaise traps and pitfall traps are good for metabarcoding? Or are you suggesting that these two alone can provide good-enough results? Or again that, while all seven techniques are good, the authors are explaining only two? (If so, why?). In any case, this should be explained in detail.

>> We do not suggest that only malaise traps and pitfall traps are good for metabarcoding, rather we suggest that these two provide a useful minimum set for providing broad representation. We are perhaps not clear enough on this in our original text, and we have

now sought to be clearer on this point (new text, lines 261). We discuss that the seven arthropod sampling methods proposed by the review of Montgomery et al. 2021 are a solid basis to develop submodules within the Sample Acquisition step of the terrestrial arthropod module. We then review existing arthropod metabarcoding literature, and identify malaise traps as the most relevant in terms of its (i) dominant use compared to the other sampling methods, and (i) lack of harmonisation. We then identify pitfall trapping as complementary to malaise trapping because it is directed to less dispersive ground active species (modified text, lines 260). Please note that we also further encourage the development of additional submodules within the terrestrial arthropod module (new text, lines 566). However, we consider malaise and pitfall trapping to be an appropriate minimum set.

- In addition to this, I would separate the sampling techniques from the metadata collection, or it could get very repetitive. In fact, independently of the collection method, the metadata information should always accompany the arthropods sample. For example, why in table 1.2 is not reported "Extreme weather events during trapping"? This is very important for pitfall traps, too. Indeed, a major rainfall could dilute the preservative or even make the trap overflow (with relative risk of losing specimens). While a very hot weather is known to cause evaporation, with the risk of drying the trap. The authors mention this in the text, but not in the table.

>> We agree with the reviewer that Sampling Event metadata can be repetitive across sample acquisition submodules. However, we feel strongly that it is so should be considered as an essential part of sample acquisition, and so we prefer to maintain it in each sample acquisition submodule. We agree with the reviewer the 'Extreme weather events during trapping' metadata is a key point also for submodule 1.2 and have incorporated the info in the corresponding Table 2.

- In the same table, since it is reported the solution % for ethanol, also the glycol solution % should be reported. When using glycol in pitfall traps, the percentage should be lower than 95% (ideally between 40%/80% due to the viscosity of this preservative). At a 95% concentration, glycol may be so viscous that insect are not entirely submerged when they fall in the trap.

>> We have clarified the concentration of the propylene glycol in Table 2.

Module 2: Sample processing.



- As for the previous module, submodule paragraphs would be very helpful.

>> [Please see our previous comment on this.](#)

- I think the authors make an interesting point on the fact that size-sorting is not as necessary as one would think when deeper sequencing depth is an option. However, I have some issues with the explanations for this statement. The authors state that "increasing sequencing depth by 3-4 fold" to a "sufficient sequencing depth", together with "reasonable size ranges" make size-sorting superfluous. All these terms, unfortunately, are extremely subjective and do not enable the reader to understand when a sufficient sequencing depth is reached. Telling the reader that they need a "sufficient sequencing depth" to be able to ignore size-sorting is a tautology: it is obvious that if the sequencing depth is sufficient your work is good. In my opinion, the question readers would ask themselves is: what is a good sequencing depth in order for me to avoid size-sorting as the authors suggest? It is mentioned an increase of 3-4 fold, but that is relative to the whatever number of reads you had to start with. It would probably be useful for the reader to understand what platform the authors are referring to at this stage, but that would also require the authors to explain how many samples they would process per run. Depending on the work conducted, an increase of 3-4 folds in sequencing depth may mean the operator has to move from a MiSeq to a NovaSeq, for example. Or reduce the number of samples processed on each run (or their replicates). These factors should be considered, or at least mentioned, when suggesting that a higher sequencing depth is better than size-sorting. If the reader makes it to the end of the modules, they will notice this topic is mentioned at page 21. I think, however, that the correlation between sample processing and sequencing depth is extremely important and should be explained in this module.

>> [The reviewer makes a good point, and we think the simplest way to deal with it is to remove the explicit mention of 3-4 fold. Indeed, 3-4 fold is specifically relevant to the reference being cited. We agree with the reviewer that the increase in sequencing depth will depend on project specific parameters, and thus there is no magic number. We thus make the general point that increased sequencing depth is an alternative to size sorting \(modified text, lines 311\). We also have reworded the text to direct the reader to the discussion of step 4 \(Amplification, library preparation and sequencing step section\) on the sequencing depth \(new text, lines 315\).](#)

I agree that size-sorting is terribly time-consuming and therefore expensive; however, having to run your samples on two runs instead of one to get a better sequencing depth would be probably more expensive. I am not sure if it can be useful to the authors, but Piper and colleagues (GigaScience, 8, 2019, 1-22, doi: 10.1093/gigascience/giz092, which is cited as reference number 7) provide a table with the costs and Gb output for each platform. This may be useful to give a reader an idea of what a good sequencing depth can be. Or link the readers to the page 21 explanation of the average reads-per-specimen expected in each sample. Otherwise, a possibly simpler solution could be to provide the reader with a method to determine what a good sequencing depth looks like. For example, a taxa recovery graph that reaches plateau has been considered a valid and easy test to determine this (Hajibabaei et al. 2019 - PLoS One. 2019; 14(9): e0220953. doi: 10.1371/journal.pone.0220953).

>> Thank you for these relevant references. We have included them in the corresponding section (new text, lines 505).

Minor changes:

Page 5, line 4: remove "are". It should read: "by placing different fractions of terrestrial diversity at the core of each "module".

>> Done.

Page 6, first 8 lines of the "Harmonisation for the metabarcoding of terrestrial arthropods" paragraph: Compared to the rest of the introduction, this paragraph could be improved both in form and in content. It seems a few different topics have just been put together, with an isolated sentence for each, without going in depth enough and without linking the sentences to each other. I suggest the authors either rewrite this paragraph or simply list the reasons why arthropods assessment is useful (e.g., biodiversity assessment, conservation of declining species, monitoring of invasives). As per the form, the use of terms such as "overwhelming" and "tremendous" could be avoided (a bit too subjective), as it should be the repetition of the word "present" at line 2.

>> We have reworded this paragraph according to reviewer suggestions (modified text, lines 151).

Page 6, last line: remove "in". It should read: "comparable to standard methods of arthropod monitoring".

>> Done.

Page 7, line 5: Close parenthesis after the references and remove the comma.

>> Done.

Page 7, first line of "Sample acquisition": "Starting point" instead of "departure point".

>> Done.

Page 15, "DNA extraction" Chapter, line 10: The authors mention the "taxonomic content of samples" and in bracket give the definition of OTUs. This can be confusing for the reader. The taxonomic content of a sample is not necessarily defined by OTUs, but could be extrapolated using ASVs (amplicon sequence variants). Since the authors are referring to a specific paper they are referencing, I suggest to change the sentence to: "When assessing the recovered taxonomic content of samples using operational taxonomic units (OTUs), intact samples performed at least comparable.

>> Changed.

Page 16: The authors suggest that 100-200 µl of DNA extraction buffer can be considered appropriate for harmonisation. This gives the impression the authors are suggesting to use only 200 units of buffer when performing the DNA extraction. In my experience, an average pitfall trap that has been in the field for a week and contains even just 2 bees and 2 beetles (very unlikely) can easily require almost 1 ml of buffer when using a non-destructive DNA extraction method. As the authors stated a few sentences earlier, this is a large volume of buffer. Then why suggesting that 100-200 µl is enough? Was this referring to the use of just 100-200 µl as a subsample to purify from the overall volume used? If so, the sentence should read something like:

"Given this consideration, typical commercial kit extraction volumes of 100-200 µl can be considered an appropriate sub-sampling volume for subsequent purification."

>> Yes, that was our point. Changed (modified text, lines 387).

Page 17, Chapter 4: gene names should be italicised. Correct to: "Cytochrome c oxidase subunit I barcode region". Please, note that "subunit I" is not part of the name and should not be italicised.

>> Done.

Page 18, Line 3: I would break the sentence in two: "The BF3 fragment (418 bp) provides better taxonomic resolution than other overlapping fragments. Furthermore, primers within this region are also unaffected by slippage, and provide maximum overlap across already published studies."

>> Done.

Page 18, Line 18: Reference is missing, check "ref".

>> Included.

Page 18, Line 20: My understanding is that the proofreading activity of a polymerase is the 3'→5' exonuclease activity. I am not sure what the "non" refers to. I think it should read: "their proofreading activity (3'→5' exonuclease activity)"

>> Corrected.

Page 23, "Conclusion" Line 1: No need to give both the full name and the abbreviation for wocDNA, since this was done previously. The authors can pick one.

>> Done.

Page 23, "Conclusion" Line 7: "address this issue".

>> Done.

Page 23, "Conclusion" Line 8 and 11: the use of the term "canalization", while technically correct, seems a bit odd and adds unnecessary jargon, especially considering the conclusion will be read by most readers. I would suggest changing this term.

>> Changed.

Page 23, "Conclusion" Line 13 and 14: "submodule", "modular" and "modules" in the same sentence makes it very hard to read.. A possible solution could be:

"the flexible structure we presented here seeks to broaden the applicability of a modular framework within the wocDNA metabarcoding community."

>> Replaced.

Page 23, "Conclusion" Line 18: Again, it is a bit repetitive to mention the submodule structure of the module. If it is a submodule, then it is already given that is part of the module. I would rephrase by removing "module".

>> Removed.

**Reviewer #2:** The manuscript makes a well-argued case for the adoption of consistent metabarcoding data generation workflows (harmonisation) for inventorying macrobiodiversity, within a modular framework, to enable larger-scale analyses that incorporate multiple datasets - and this is clearly a good idea. To do this, the authors review the relevant literature, and based on this, provide sets of workflow recommendations, at five key data generation steps, within a proposed terrestrial arthropod metabarcoding module.

The paper is largely well written and easy to follow (apart from some parts detailed in the line-by-line comments below). The authors have done an excellent job of reviewing the relevant literature, and the manuscript is packed with useful workflow recommendations for metabarcoding of terrestrial invertebrates. A particularly helpful aspect is the consideration of all data generation steps, from initial sampling through to the storage of sequence data and metadata.

One possible omission is that almost no mention is made of arthropods living below ground, which is an important component of terrestrial arthropod biodiversity, with another set of sampling methods and considerations. Given that the manuscript focuses on workflows for "terrestrial arthropods", I think it should at least be mentioned that that sampling for soil arthropod metabarcoding would be another submodule, but is not considered in this manuscript. Similarly, it might be helpful to suggest other modules that could or should be developed, within the conclusion?

>> Thank you for your assessment, and for the general point you raise in your last paragraph. We fully agree on the importance of considering soil arthropods. In this manuscript, we reviewed the literature and focused on developing two submodules that we find to have more immediate relevance, in terms of their already popular implementation (i.e. malaise traps), complementarity (i.e. pitfall trapping) and lack of harmonisation. Soil arthropods are an obvious candidate for further submodule development. We agree that it is worth suggesting different submodules within the conclusions that could or should be developed within the terrestrial arthropod module, and we explicitly mention soil arthropods as an important candidate group (new text, lines 566).

Are these modules going to exist anywhere apart from within this manuscript and subsequent manuscripts? It might be helpful to have a website that collects all these modules into one place for easy access, somewhat like the Earth microbiome project website.

>> We plan to place submodules in the iBioGen project webpage (<https://www.ibiogen.eu/deliverables.html>), together with this and subsequent manuscripts on this topic. Additionally, we have prepared a video explaining the details of the submodules proposed in this manuscript. This video is already available via the iBioGen webpage (see <https://www.ibiogen.eu/dissemination.html>). Please note, it still requires final editions to accommodate modifications resulting from this review process. Once updates have been implemented and our manuscript accepted, it will be disseminated through the social media of the iBioGen project, and the authors.

L 34: For inventorying biodiversity? For compiling biodiversity inventories?

>> Changed.

L 79: It is unclear whether "metabarcoding inventory data" means the data resulting from metabarcoding analyses, or the data about metabarcoding methods/workflows?

>> Clarified.

L 89: I think "global microbial initiatives" is missing something. Global microbial diversity assessment initiatives? Also, I'm not sure "(even if data generation has been centralised)" is needed.

>> Reworded.

L 94: What are eDNA initiatives, as opposed to metabarcoding initiatives?

>> Clarified.

L 98: "one of the most heterogeneous groups in terms of body size"?

>> Done.

L 99: I think it would be clearer to use "inventorying of" (i.e. compiling an inventory), rather than "inventory". (Inventorying is used elsewhere, e.g. L 108, 166).

>> Reworded.

L 110: "calibration and so" seems unnecessary.

>> Removed.

L 111: It's unclear to me why catalysis of a GO network is the key challenge. Perhaps consistent workflows are implicit in a GO network? But consistent workflows could exist without a GO network too. Can you clarify how a GO network helps?

>> We agree with the reviewer and have reworded to clarify (modified text, lines 112).

L 119-122: Arguably, bioinformatic processing of raw sequence data into processed data is another key step (depending on whether "data" is the raw sequence data, or processed OTU/ASV data). Evidently, this is not within the scope of the manuscript, but it might be worth mentioning somewhere that post-sequencing aspects of metabarcoding workflows can also vary a lot, resulting in incomparable datasets. However, this is less problematic because one can theoretically re-process the sequence data from different studies in a consistent manner.

>> We fully agree with the reviewer on the importance of harmonisation for the bioinformatic processing of raw sequence data, and we have recently published specifically on this topic (Creedy et al. 2022 (our reference 34). We have now mentioned this aspect in the manuscript, as suggested by the reviewer (new text, lines 87).

L 140-142: This sentence is very confusing. "long-view" should probably be "long-term goal"; "synthetic analyses" sounds like analyses of synthetic (artificial or man-made) data; and I'm not sure what "a function of any collateral costs" means. Please rephrase.

>> Reworded.

L 144: minimal compromise, if any?

>> Reworded.

L 150: The declines of insects (plural) are now a very real and serious threat?

>> Corrected.

L 161: inventorying arthropod biodiversity?

>> Reworded.

L 162: Remove "in".

>> Done.

L 183-184: panacea? Might be better to say "no one method detecting the entire arthropod diversity within a site"

>> Done.

L 273: I'm not sure "for harmonisation" is needed here.

>> Removed.

L 321: Photographing of invertebrate samples is an excellent idea!

>> Thanks.

L 330: Would there be a benefit to trying to orient all the specimens in the same way, for potential future visual-based identifications? (probably time-consuming though).

>> This is ideal but very time-consuming in most types of arthropod bulk samples, that is why we did not include it.

L 307: "4mm sieve pooled 1:10 to 2:10" is unclear. Does it mean, the < 4mm and > 4mm fractions are pooled together at a ratio of 1:10 to 2:10? Which fraction is the higher ratio? Please clarify.

>> Clarified.

L 337: What is a SuperGO?

>> Within the spatially led terrestrial GO network that we propose in Arribas et al. 2021, SuperGOs are sites where molecular community data is more intensively generated at both the temporal and the genomic axes, consistent with the idea of "model ecosystems" (Davies et al., 2012, 2014). This has now been clarified in the text (new text, lines 351).

L 398-405: "COI-bcr" is unnecessary, only used in this paragraph. "COI barcode" is used on line 408 to mean the same thing, and is clearer. I suggest replacing "COI-bcr" on lines 401 and 405 with "COI barcode" and "COI barcode region", respectively.

>> Done.

L 405-406: This sentence should be rephrased. Multiple COI-targeted primer sets ... demonstrated to efficiently characterise arthropods ... particularly those with certain degenerate positions?



>> Reworded.

L 407: see Figure 2 in Elbrecht et al.? Should "second half" be 3' (prime)?

>> Done.

L 408-412: Can you provide citation for claims about BF3, and for primers BF2, III\_B\_F, Fol-degen-rev? I think the "primers within this region..." statement should be qualified with a word such as "published" or "tested". Maximum overlap of what among already published studies? (COI regions?) Do these primers have any limitations in terms of taxonomic coverage?

>> We have now provided references, and specifically cite Figure 2 in Elbrecht et al., [37] for a summary of the sequence, original citation and efficiency of each primer set (modified text, lines 424).

L 412: Why "eDNA metabarcoding" here, but just "metabarcoding" everywhere else?

>> Removed.

L 424: Citation missing?

>> Included.

L 471: Why would that be so? (Lower cost?)

>> Yes, clarified.

Table 5: What is BC3 fragment? I'm not sure how useful it is to recommend "degenerate primers" here - presumably it is certain specific COI-targeted degenerate primers that are recommended, not degenerate primers in general, in which case should they be listed here?

>> We have added additional details to Table 5 to clarify these aspects already included in the text.

L 533: I'm not sure what canalisation means. Replace with harmonisation?

>> Replaced.

L 539-540: "of modules" seems repetitive (of submodules) and unnecessary.

>> Removed.
